# Supplementary material for: Solvent interception, heterocyclization and desilylation upon NBS-induced sulfamidation of trimethyl(vinyl)silane
Source: Royal Society of Chemistry journal article supplement (doi:10.1039/c9ob01689a), 2019-01-01

**Solvent Interception, Heterocyclization and Desilylation upon NBS-induced Sulfamidation of  
Trimethyl(vinyl)silane**

**Vera V. Astakhova, Mikhail Yu. Moskalik, Bagrat A. Shainyan**

A.E. Favorsky Irkutsk Institute of Chemistry, Siberian Division of the Russian Academy of Sciences, 1  
Favorsky Street, 664033 Irkutsk, Russian Federation

\*Corresponding Author: Prof. Dr. Bagrat A. Shainyan,

A.E. Favorsky Irkutsk Institute of Chemistry,  
Siberian Division of the Russian Academy of Sciences, 1 Favorsky Street, 664033 Irkutsk, Russian  
Federation, [bagrat@irioch.irk.ru](mailto:bagrat@irioch.irk.ru).

**Electronic supplementary information**

Copies of  $^1\text{H}$  and  $^{13}\text{C}$  NMR spectra of all compounds

# Copies of $^1\text{H}$ and $^{13}\text{C}$ NMR spectra of all compounds

## $^1\text{H}$ NMR spectrum of compound **2**

(1,2-Dibromoethyl)trimethylsilane, **2**

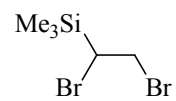

3.9995  
3.9882  
3.9720  
3.9604  
3.7438  
3.7178  
3.6903  
3.5115  
3.5002  
3.4859  
3.4743

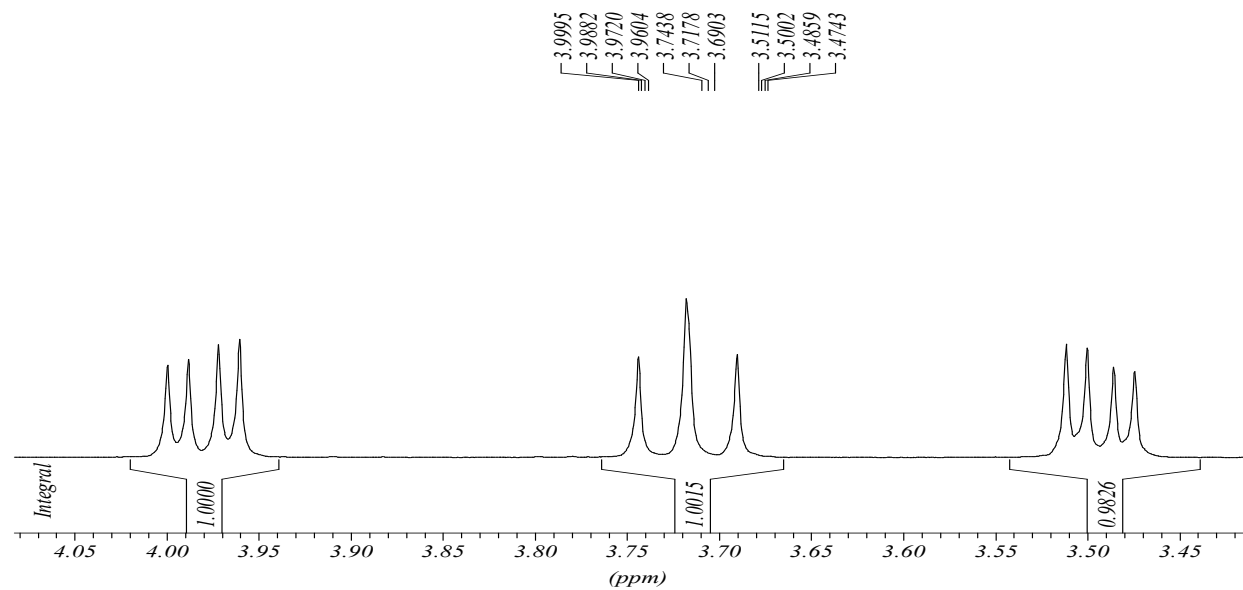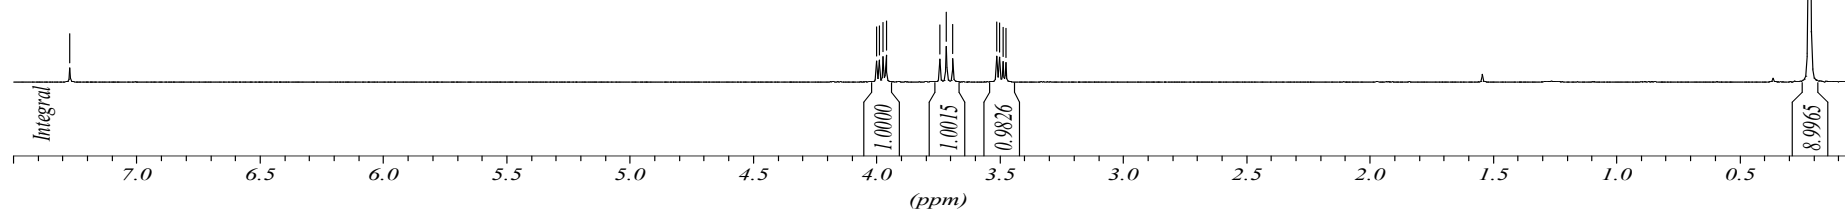

$^{13}\text{C}$  NMR spectrum of compound **2**

*(1,2-Dibromoethyl)trimethylsilane, 2.*

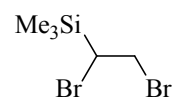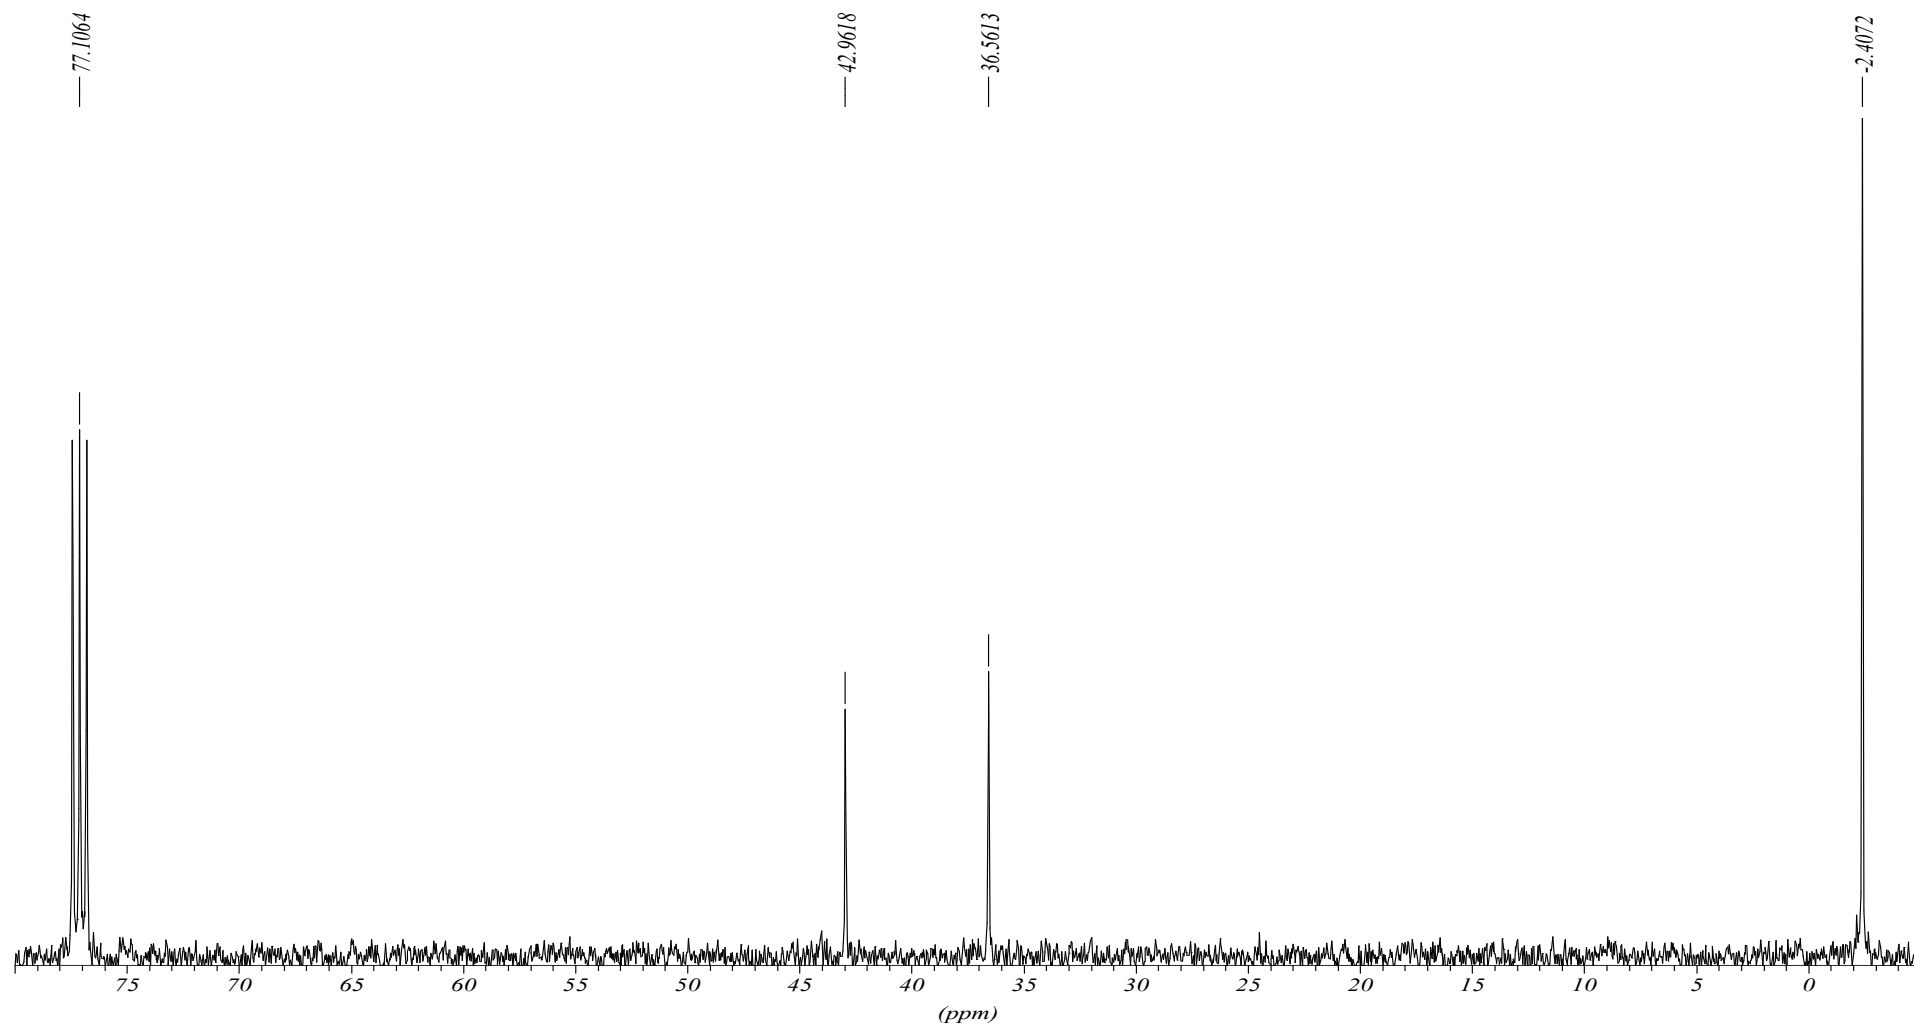

# $^1\text{H}$ NMR spectrum of compound **3a**

*N*-(2-bromo-2-(trimethylsilyl)ethyl)-1,1,1-trifluoromethanesulfonamide, **3a**.

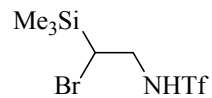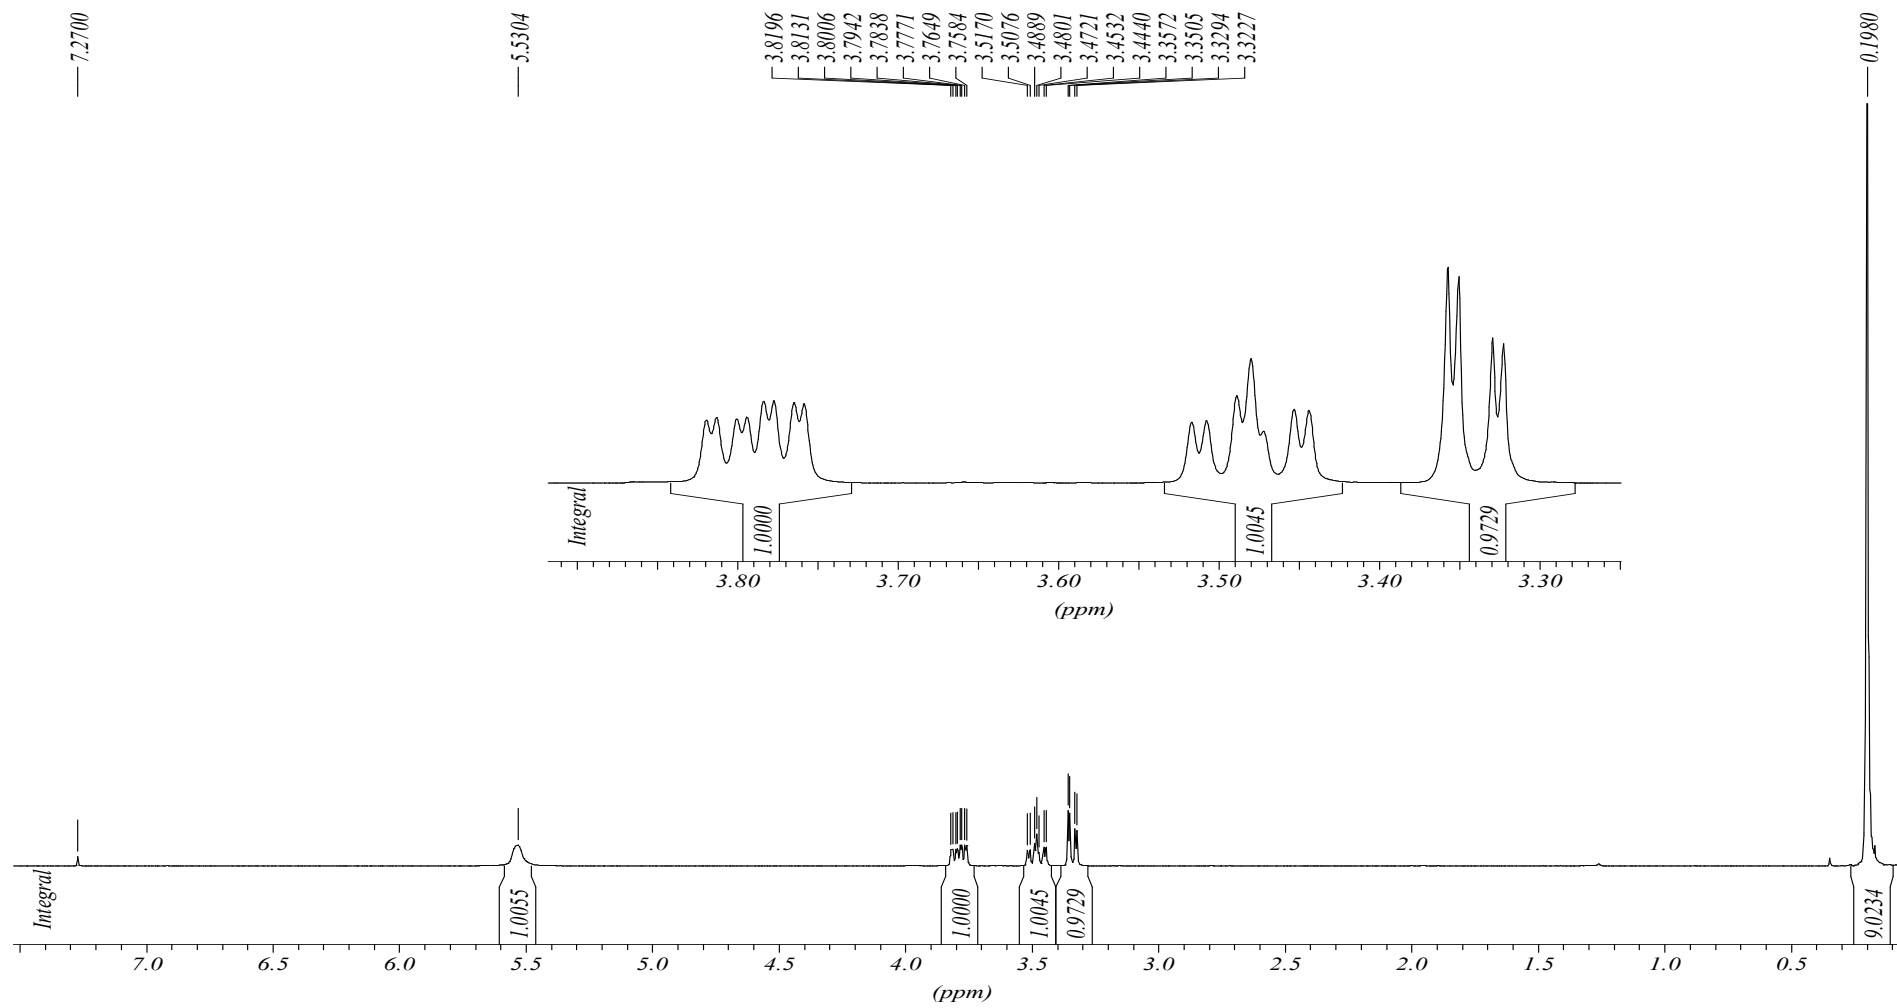

<sup>13</sup>C NMR spectrum of compound, **3a**

*N*-(2-bromo-2-(trimethylsilyl)ethyl)-1,1,1-trifluoromethanesulfonamide, **3a**.

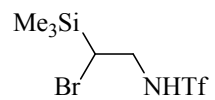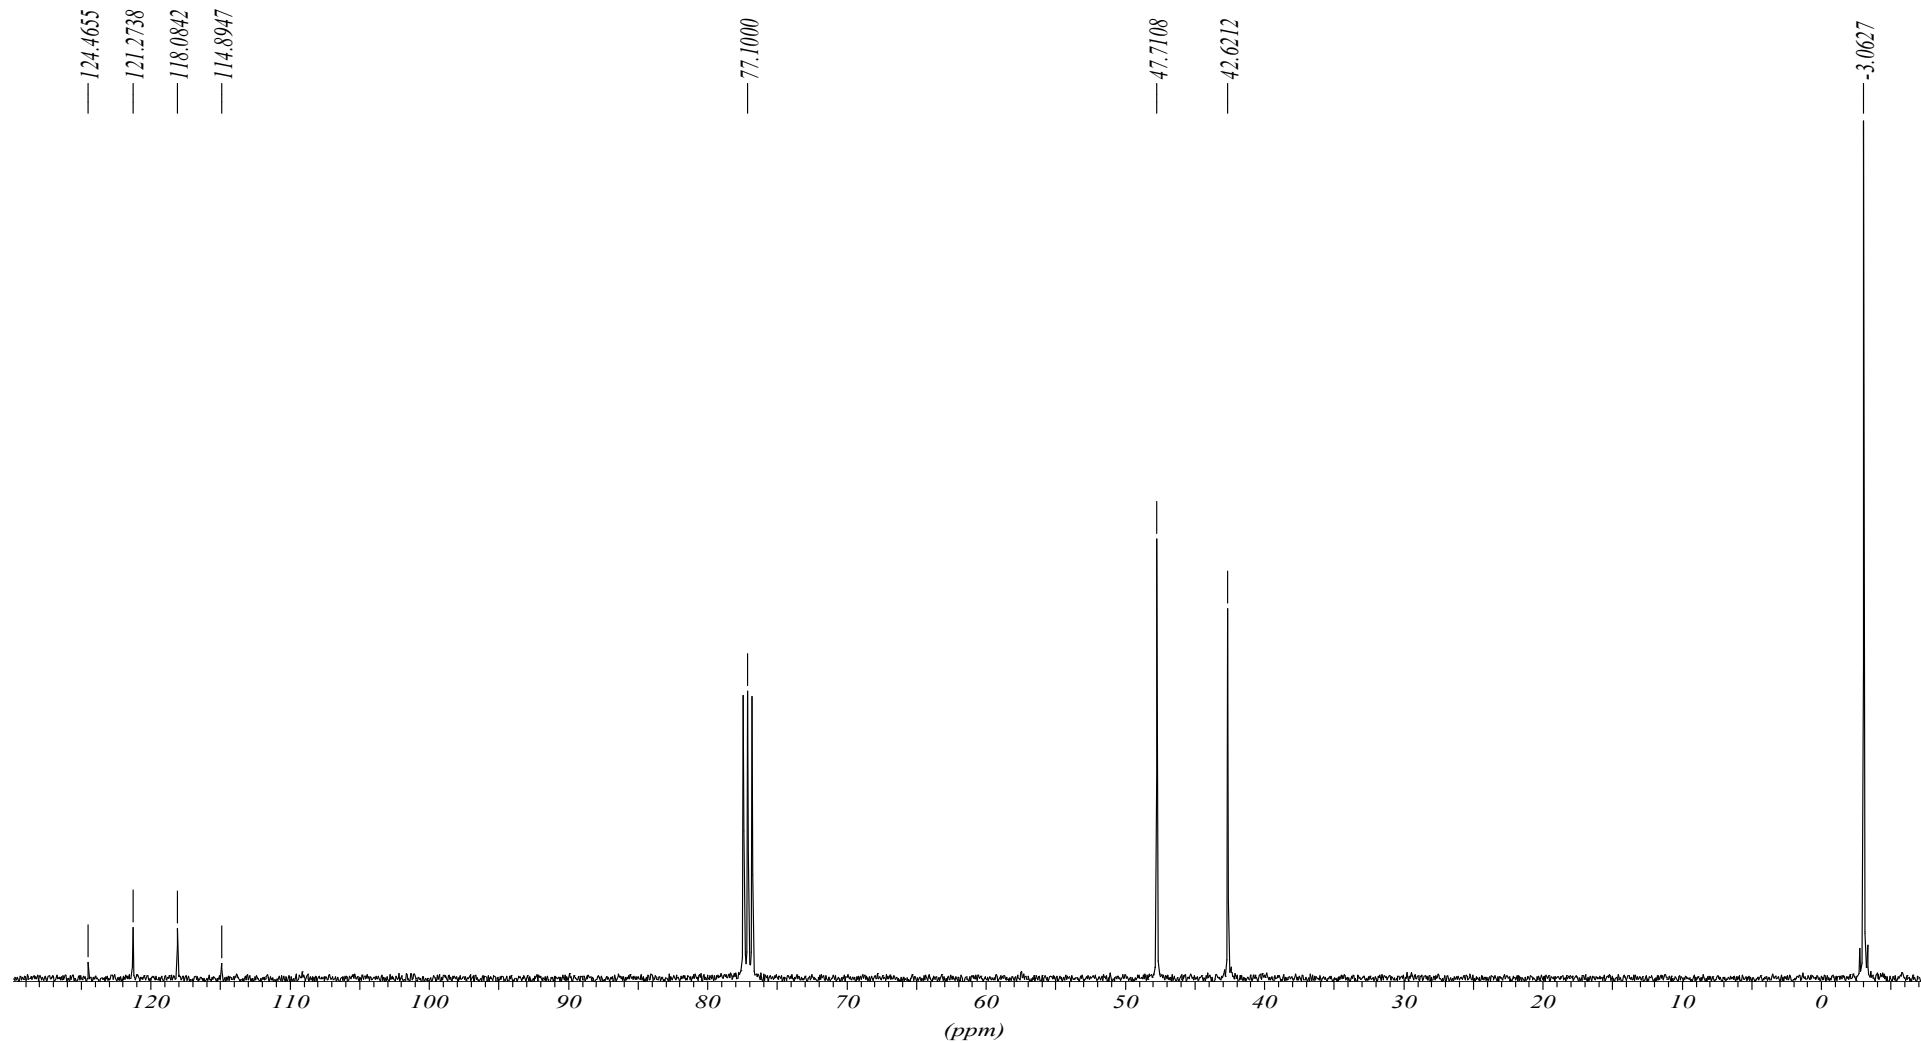

# <sup>1</sup>H NMR spectrum of compound **3b**

*N*-(2-bromo-2-(trimethylsilyl)ethyl)methanesulfonamide, **3b**.

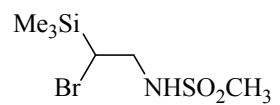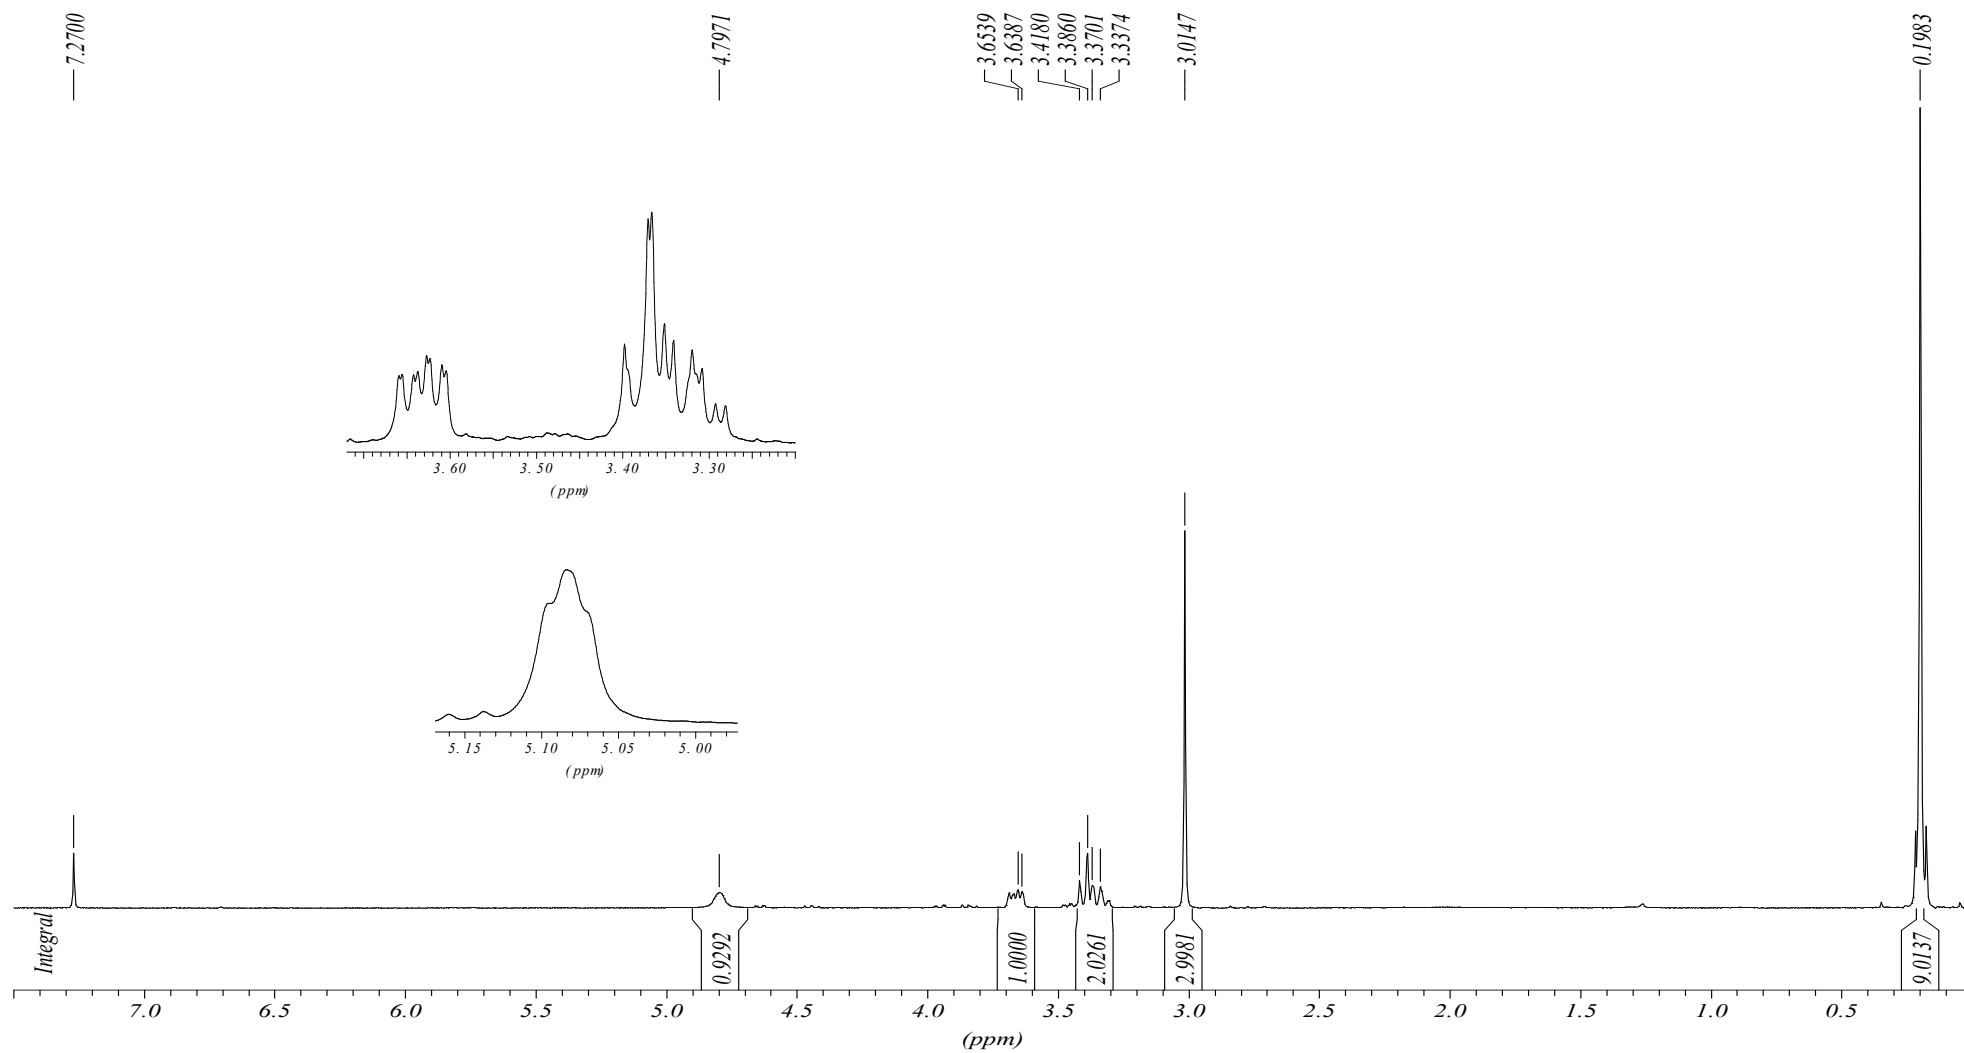

$^{13}\text{C}$  NMR spectrum of compound, **3b**

*N*-(2-bromo-2-(trimethylsilyl)ethyl)methanesulfonamide, **3b**.

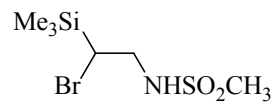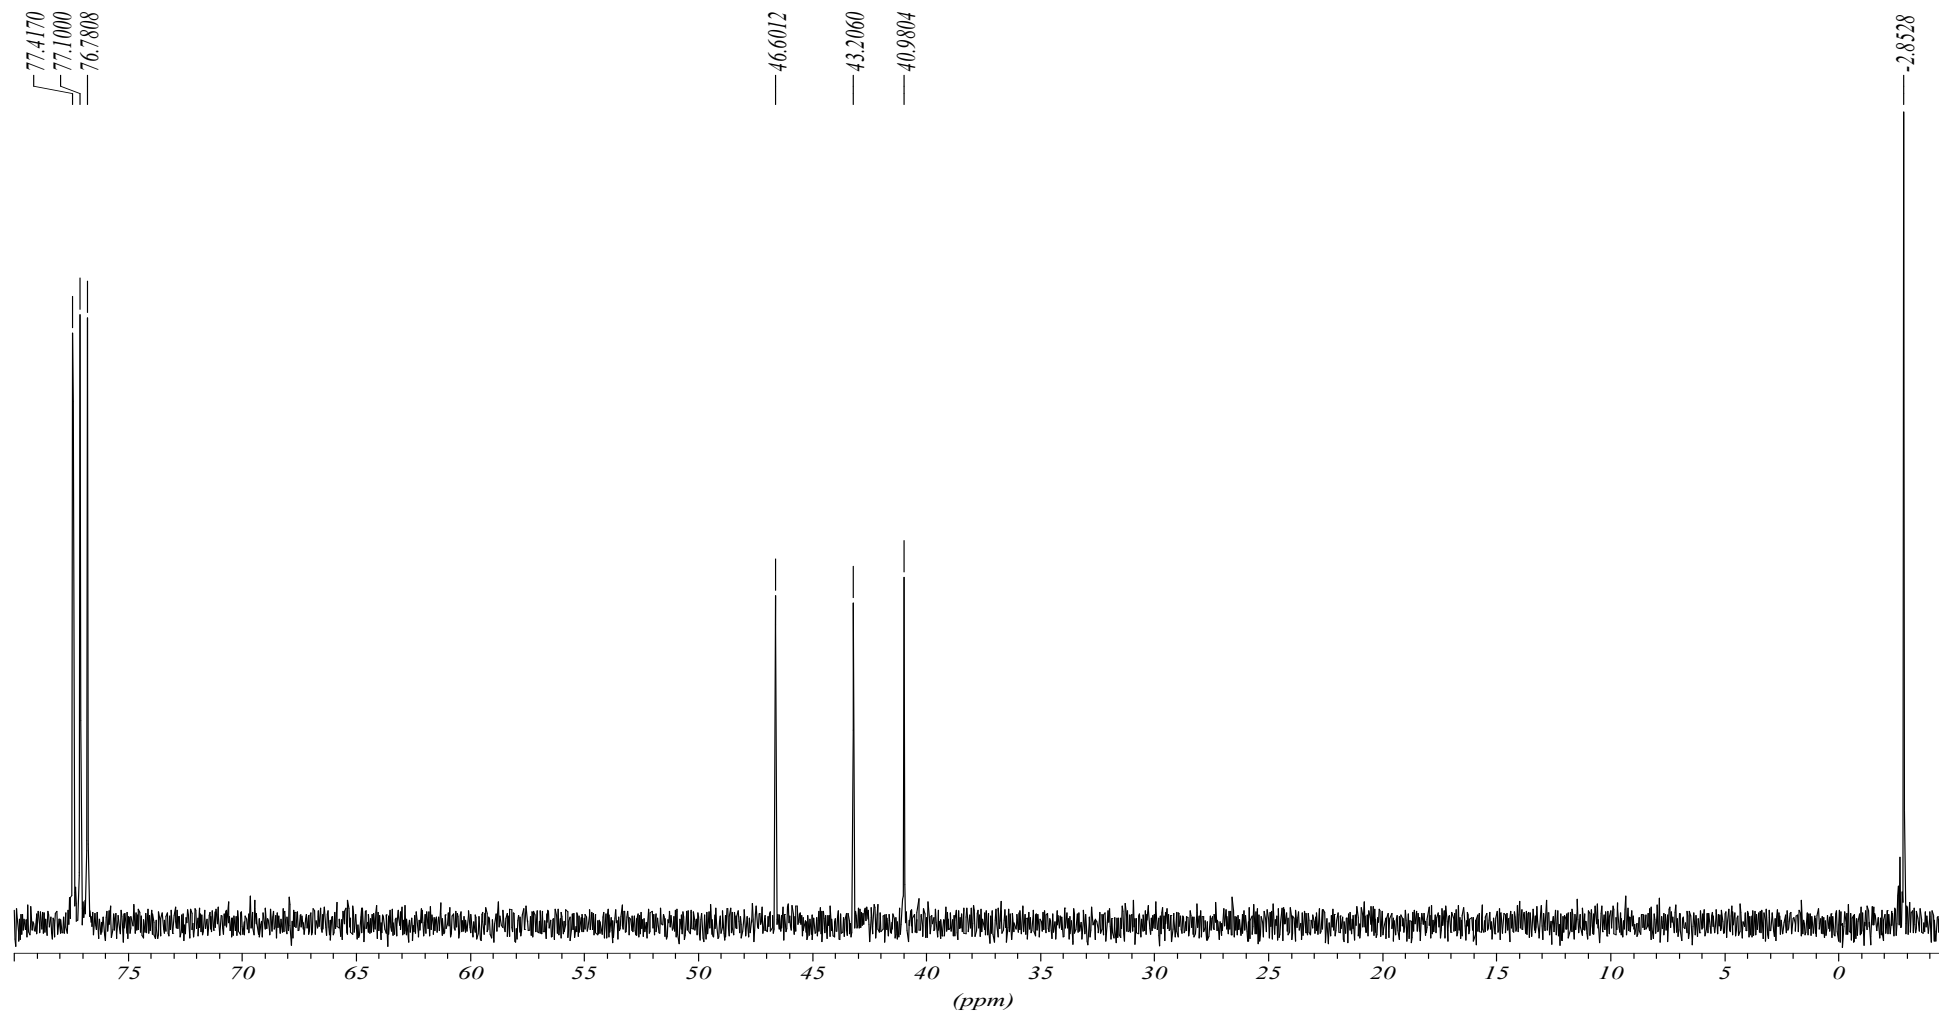

<sup>1</sup>H NMR spectrum of compound **3c**  
*N*-(2-bromo-2-(trimethylsilyl)ethyl)benzenesulfonamide, **3c**

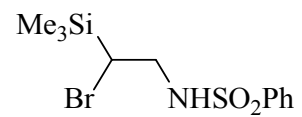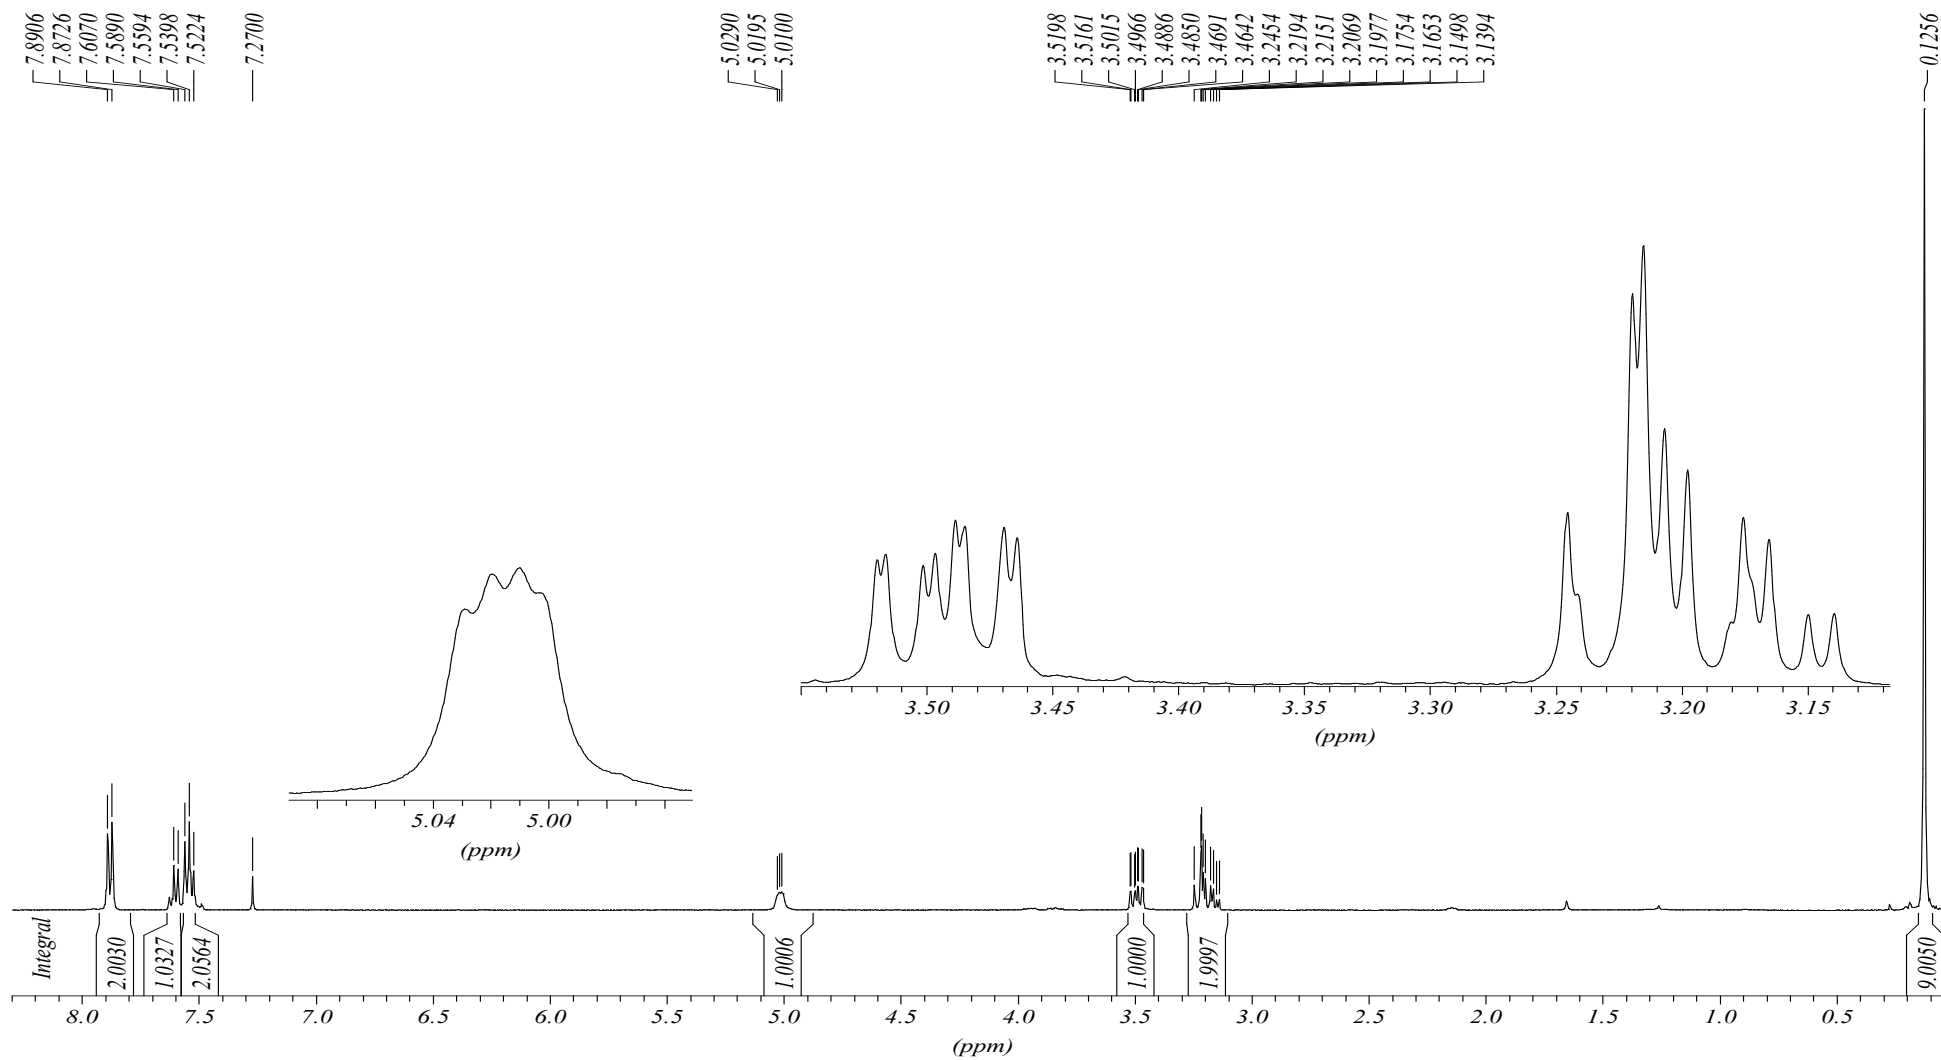



<sup>13</sup>C NMR spectrum of compound, **3c**

*N*-(2-bromo-2-(trimethylsilyl)ethyl)benzenesulfonamide, **3c**

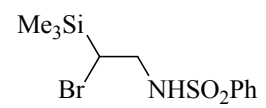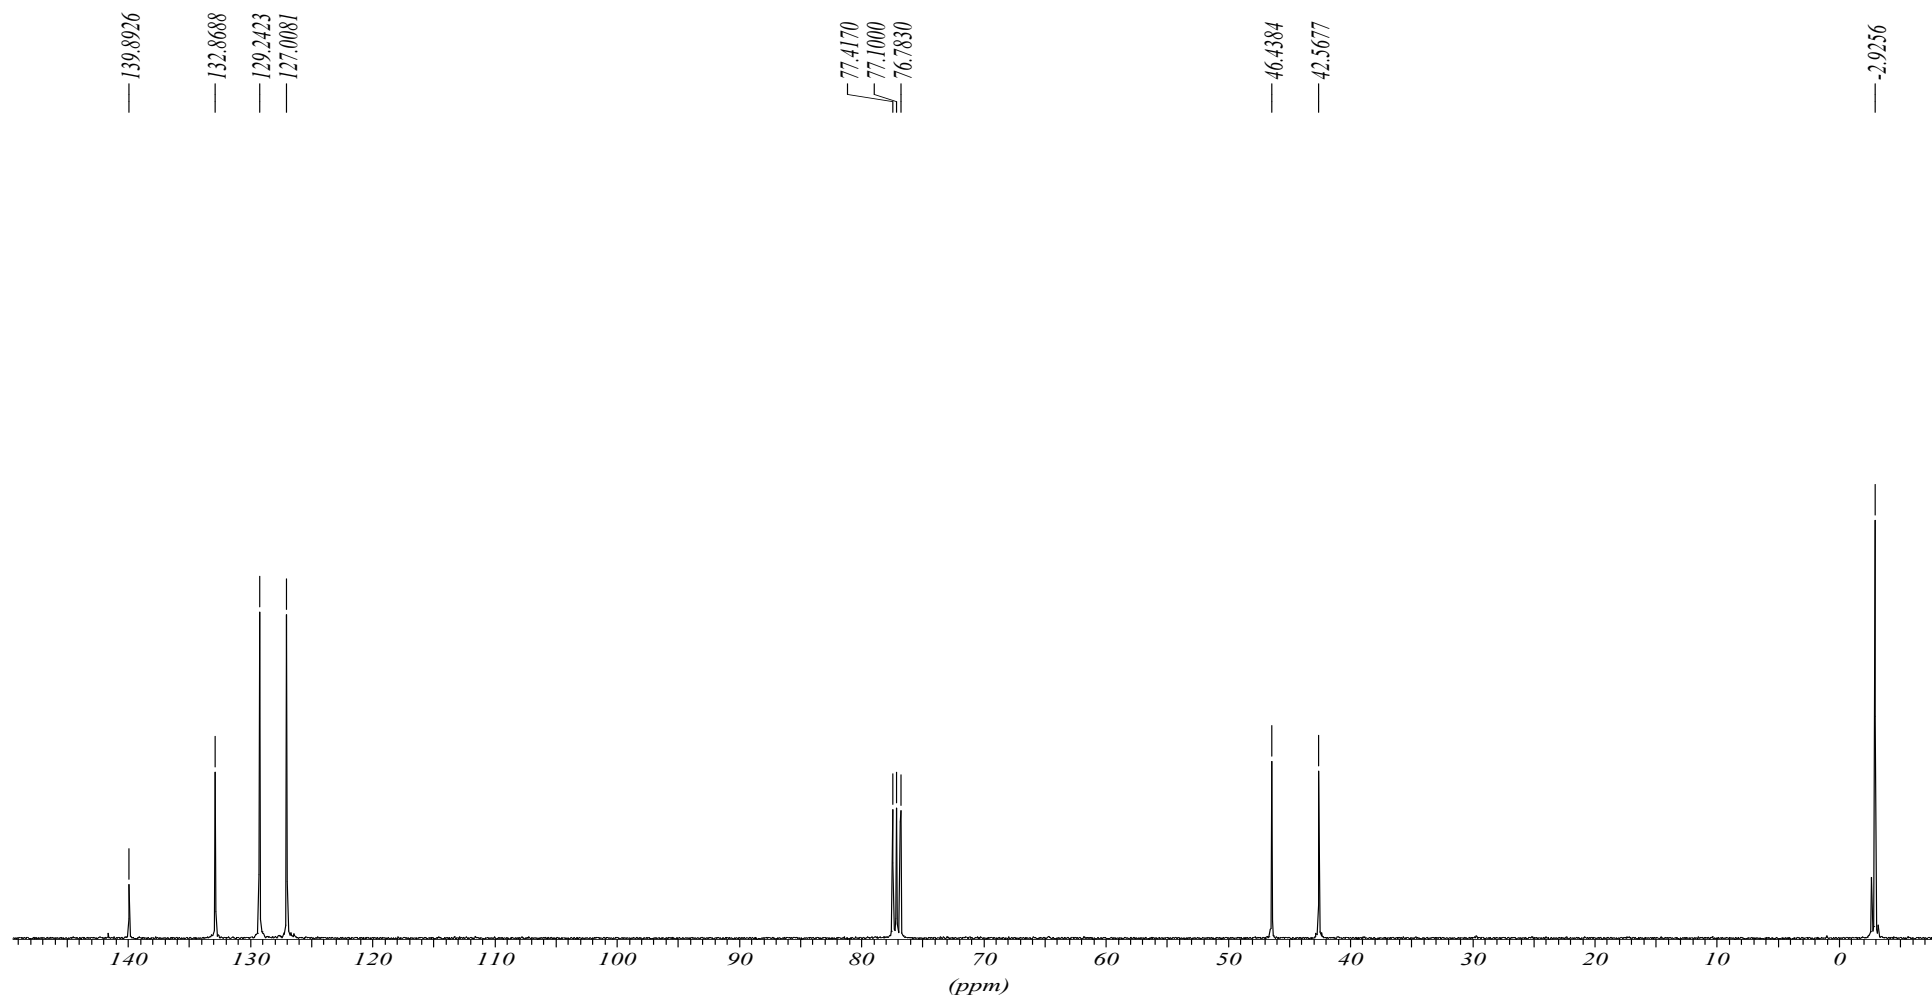

# <sup>1</sup>H NMR spectrum of compound **3d**

*N*-(2-Bromo-2-(trimethylsilyl)ethyl)-4-methylbenzenesulfonamide, **3d**

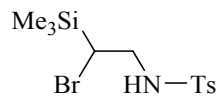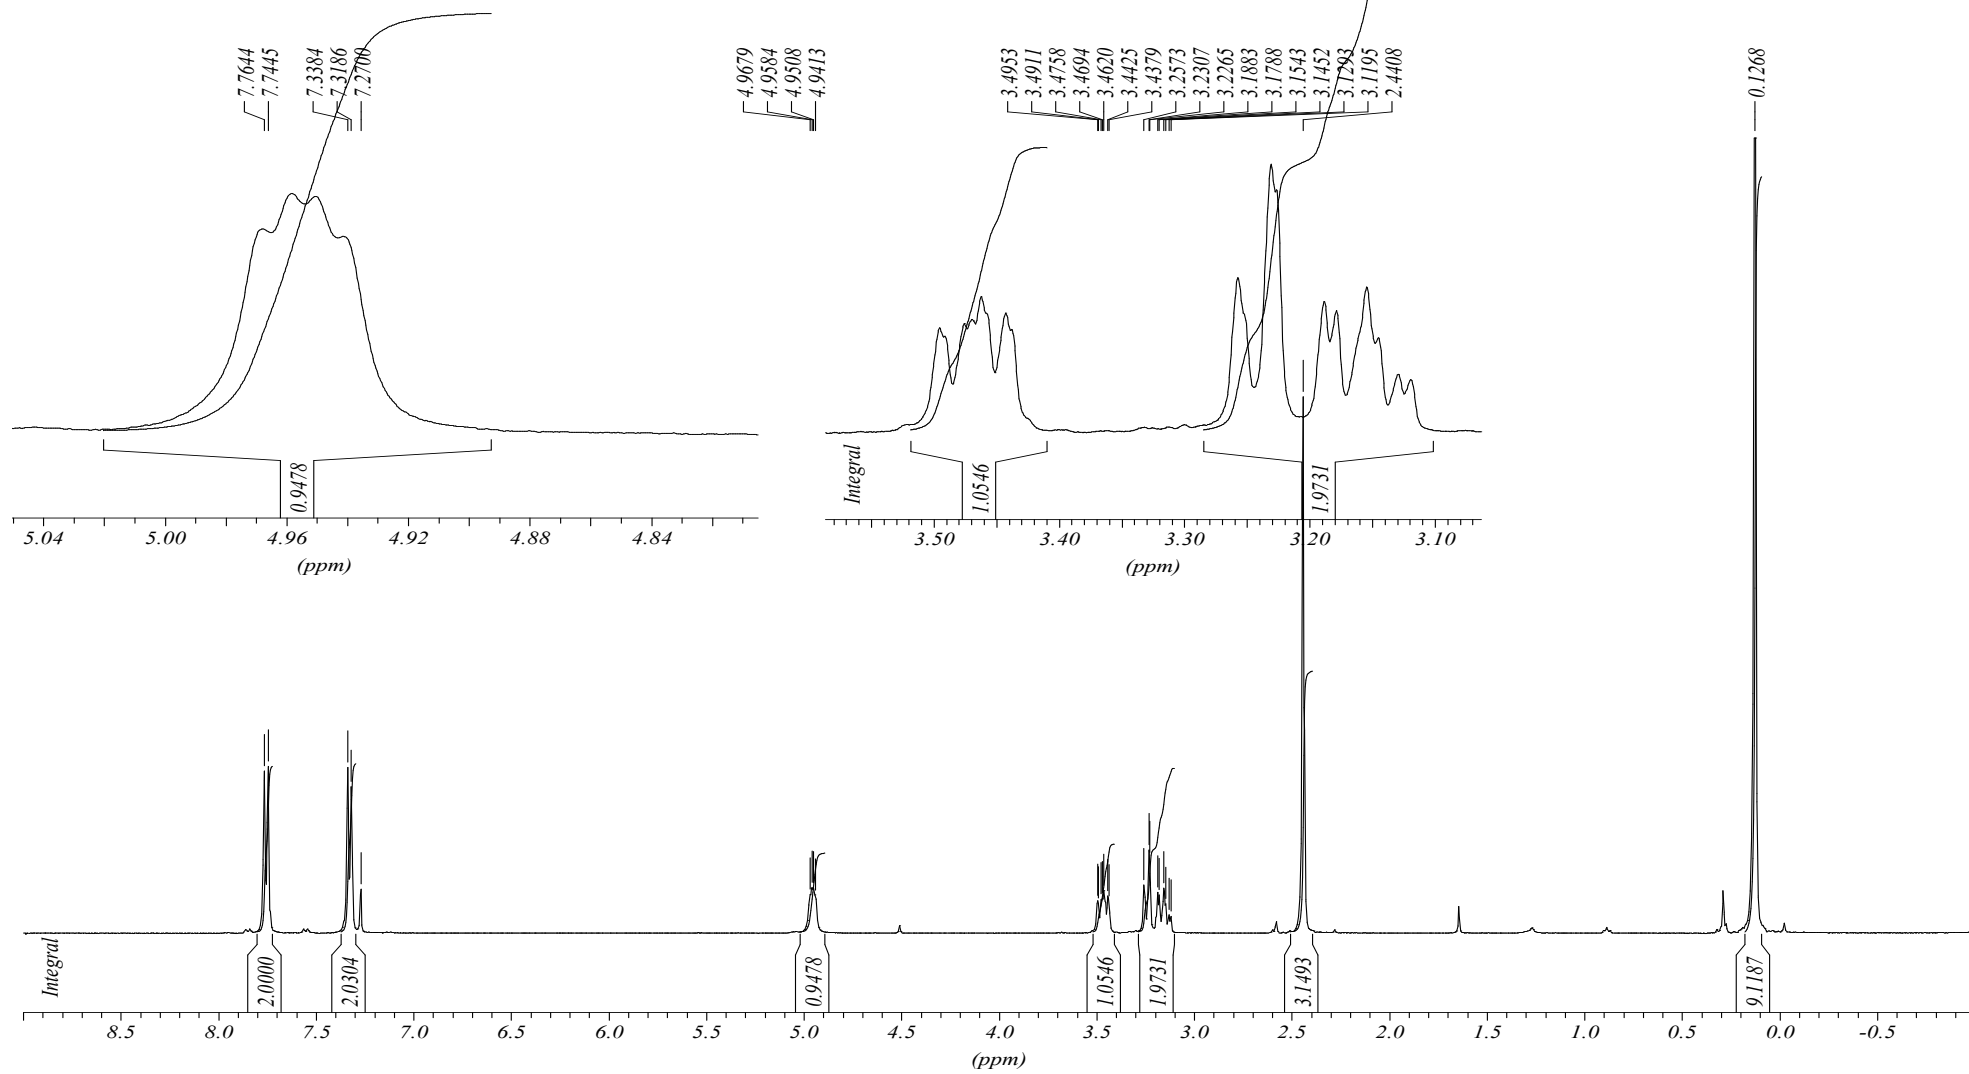

<sup>13</sup>C NMR spectrum of compound, **3d**

*N*-(2-Bromo-2-(trimethylsilyl)ethyl)-4-methylbenzenesulfonamide, **3d**

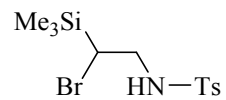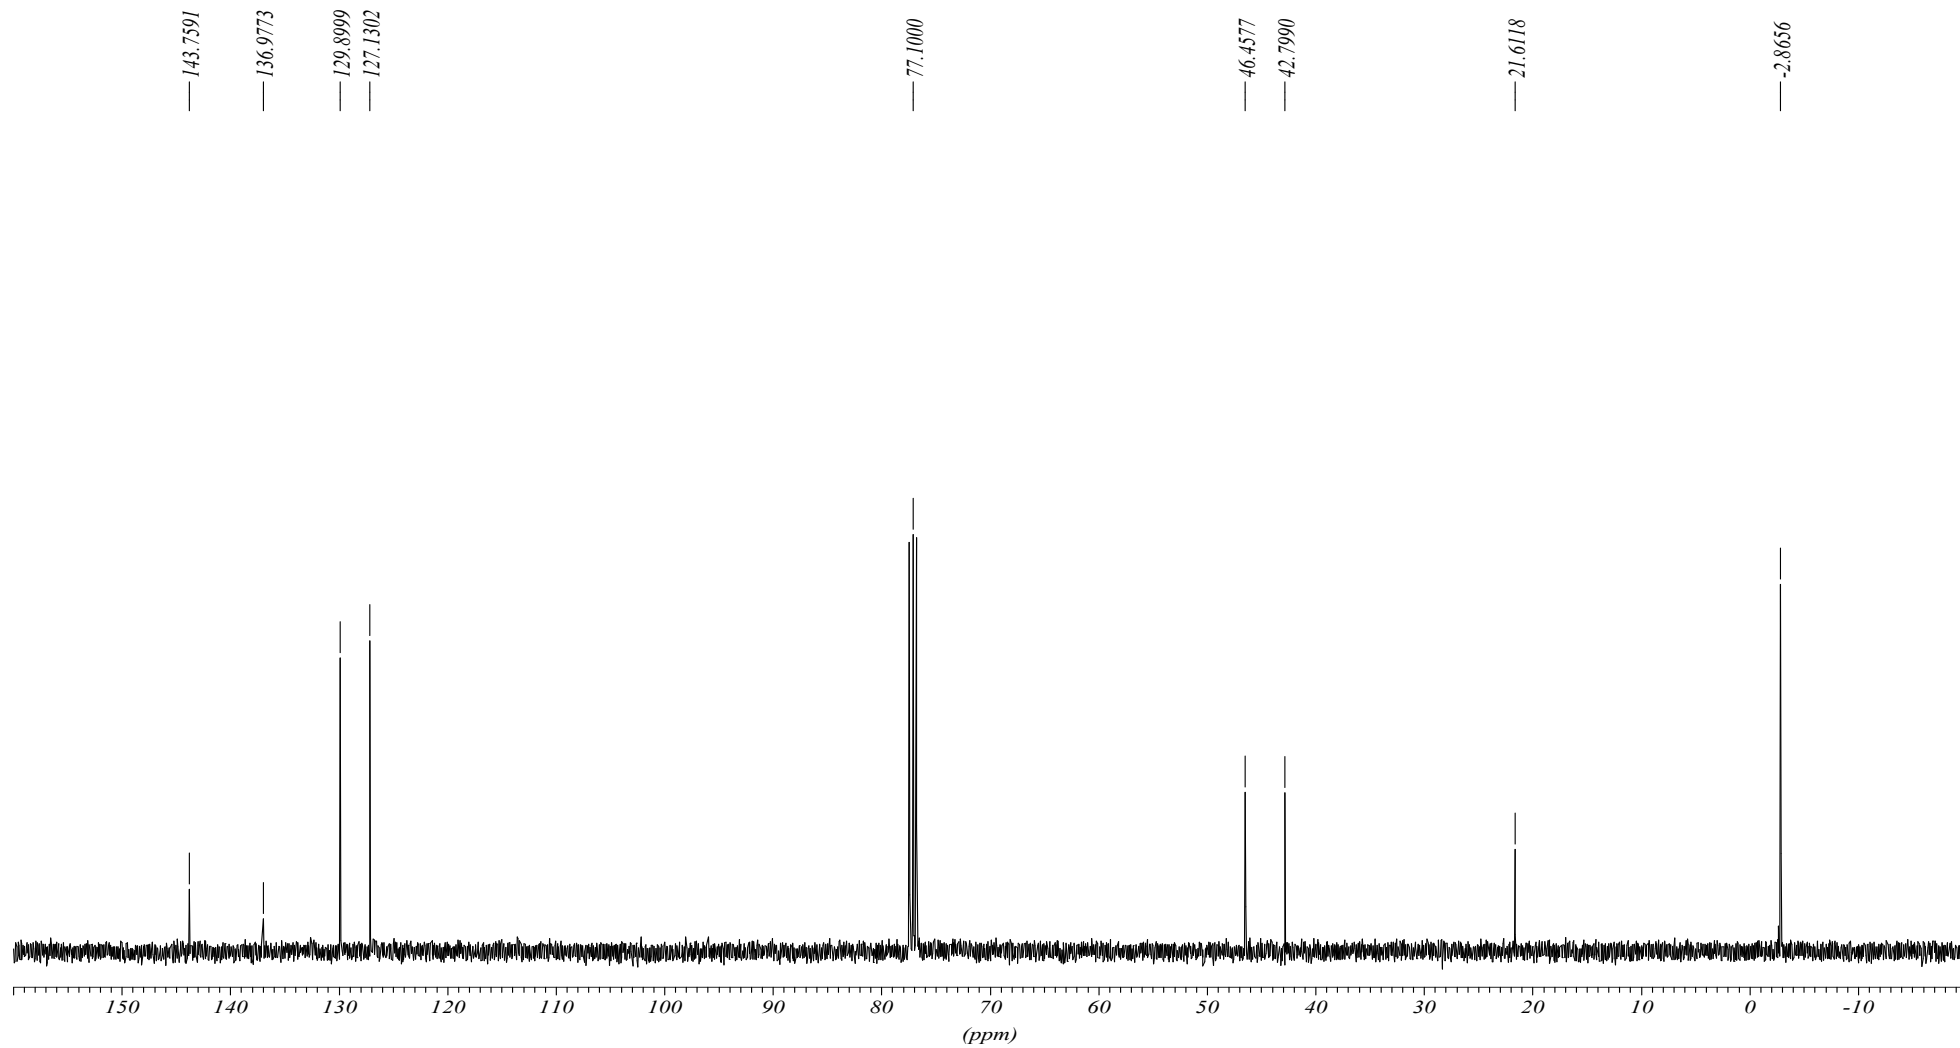

<sup>1</sup>H NMR spectrum of compound **3e**

*N*-(2-bromo-2-(trimethylsilyl)ethyl)-4-methoxybenzenesulfonamide, **3e**

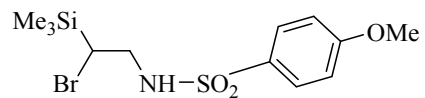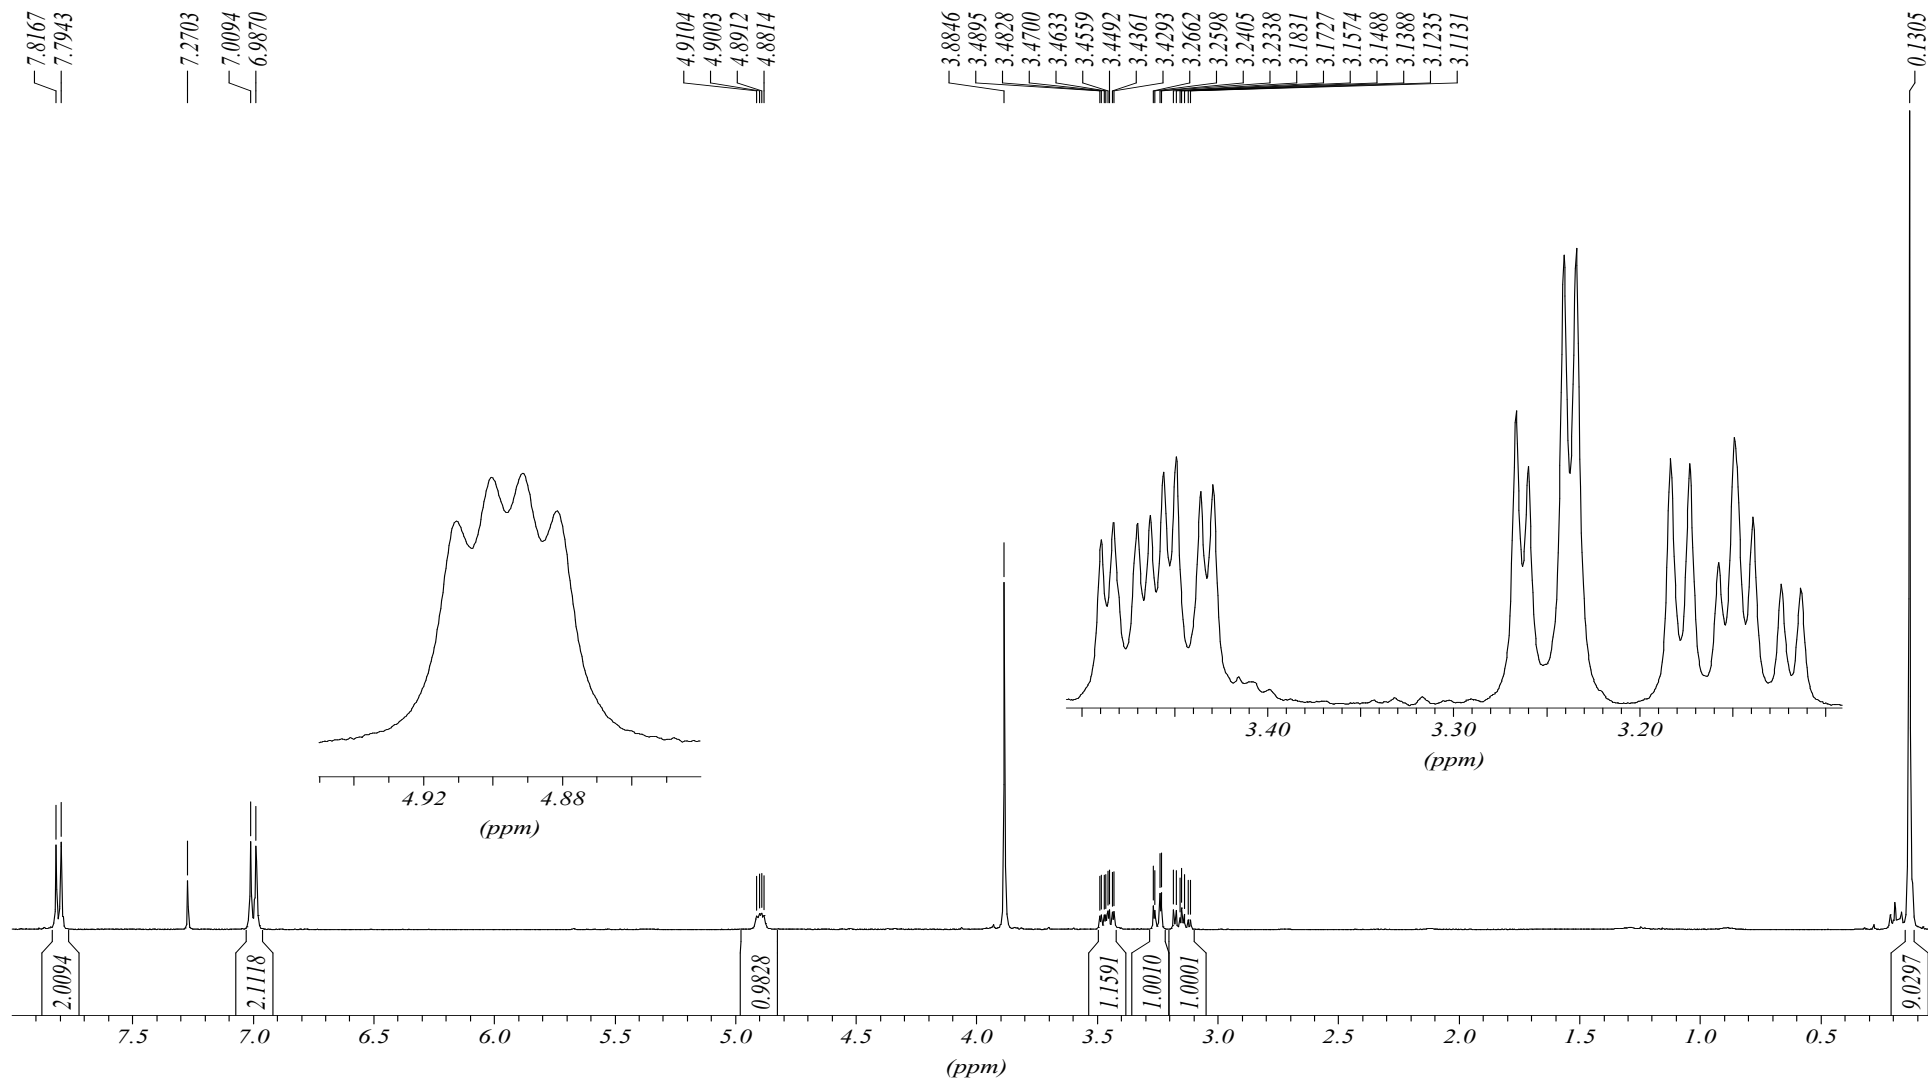

<sup>13</sup>C NMR spectrum of compound, **3e**

*N*-(2-bromo-2-(trimethylsilyl)ethyl)-4-methoxybenzenesulfonamide, **3e**

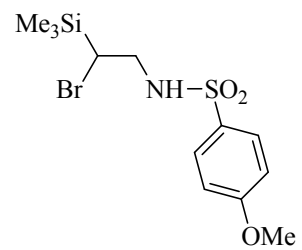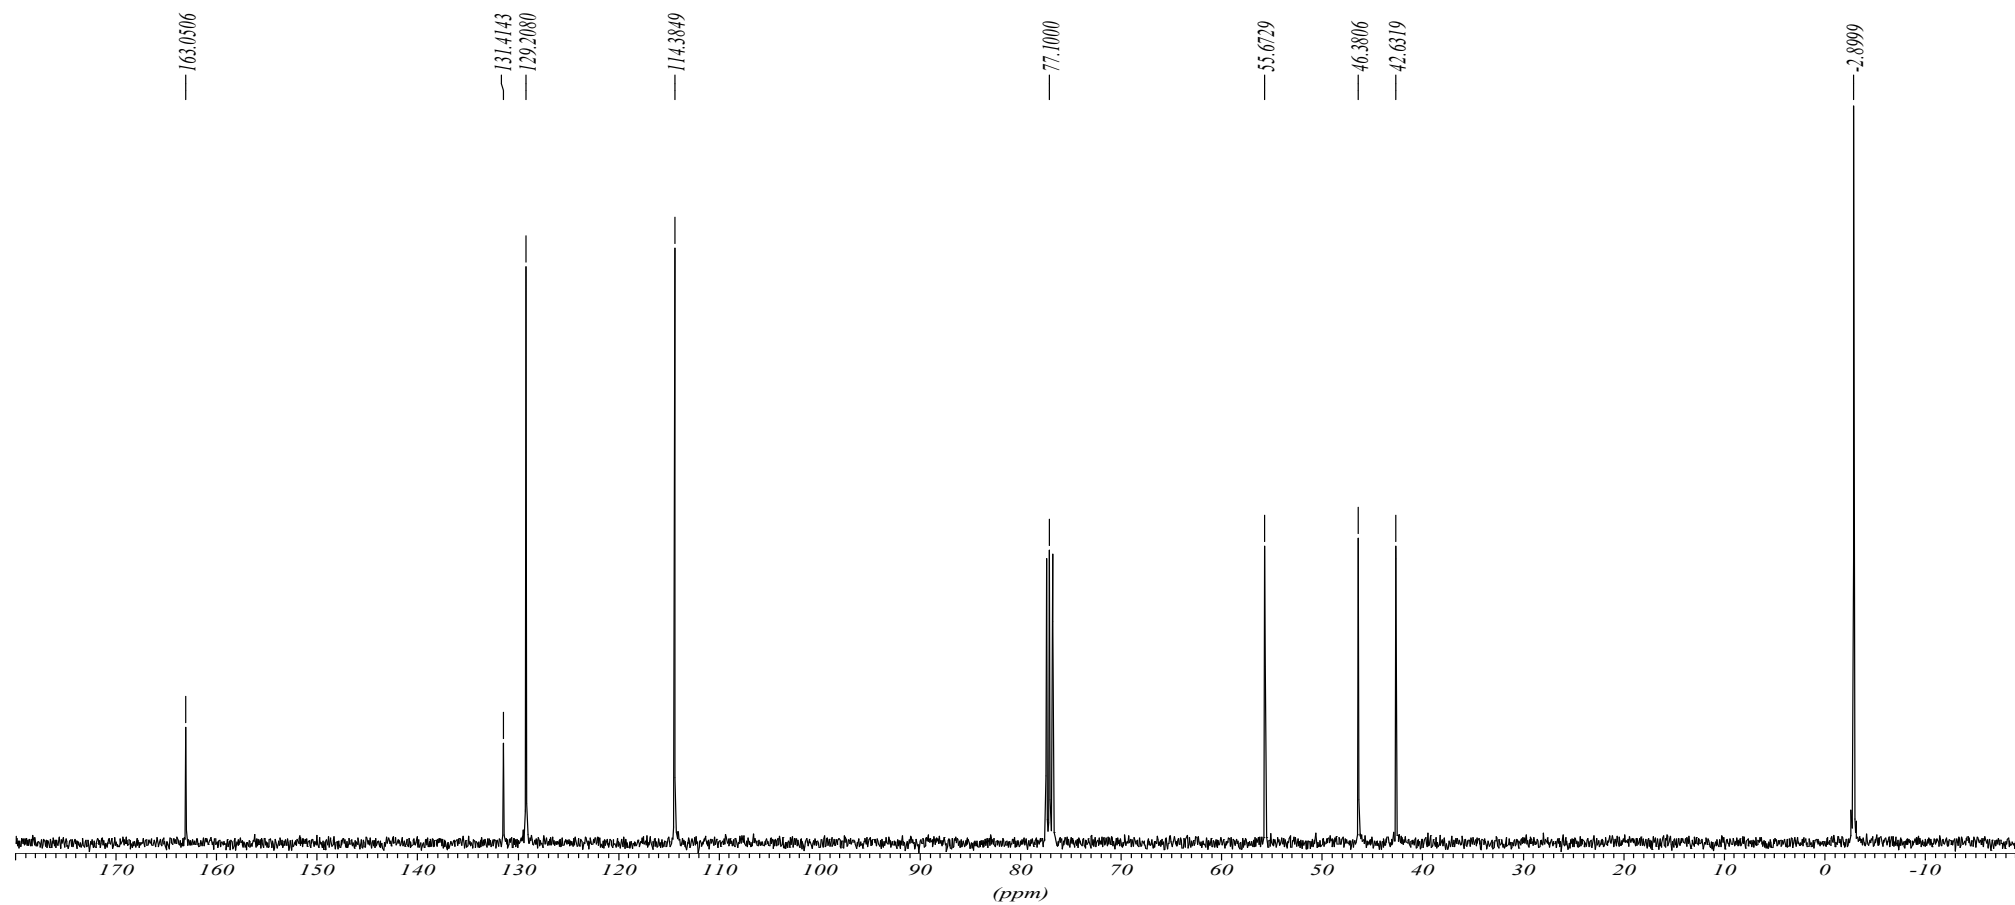

<sup>1</sup>H NMR spectrum of compound **3f**  
*N*-(2-bromo-2-(trimethylsilyl)ethyl)-4-chlorobenzenesulfonamide, **3f**

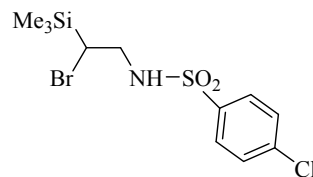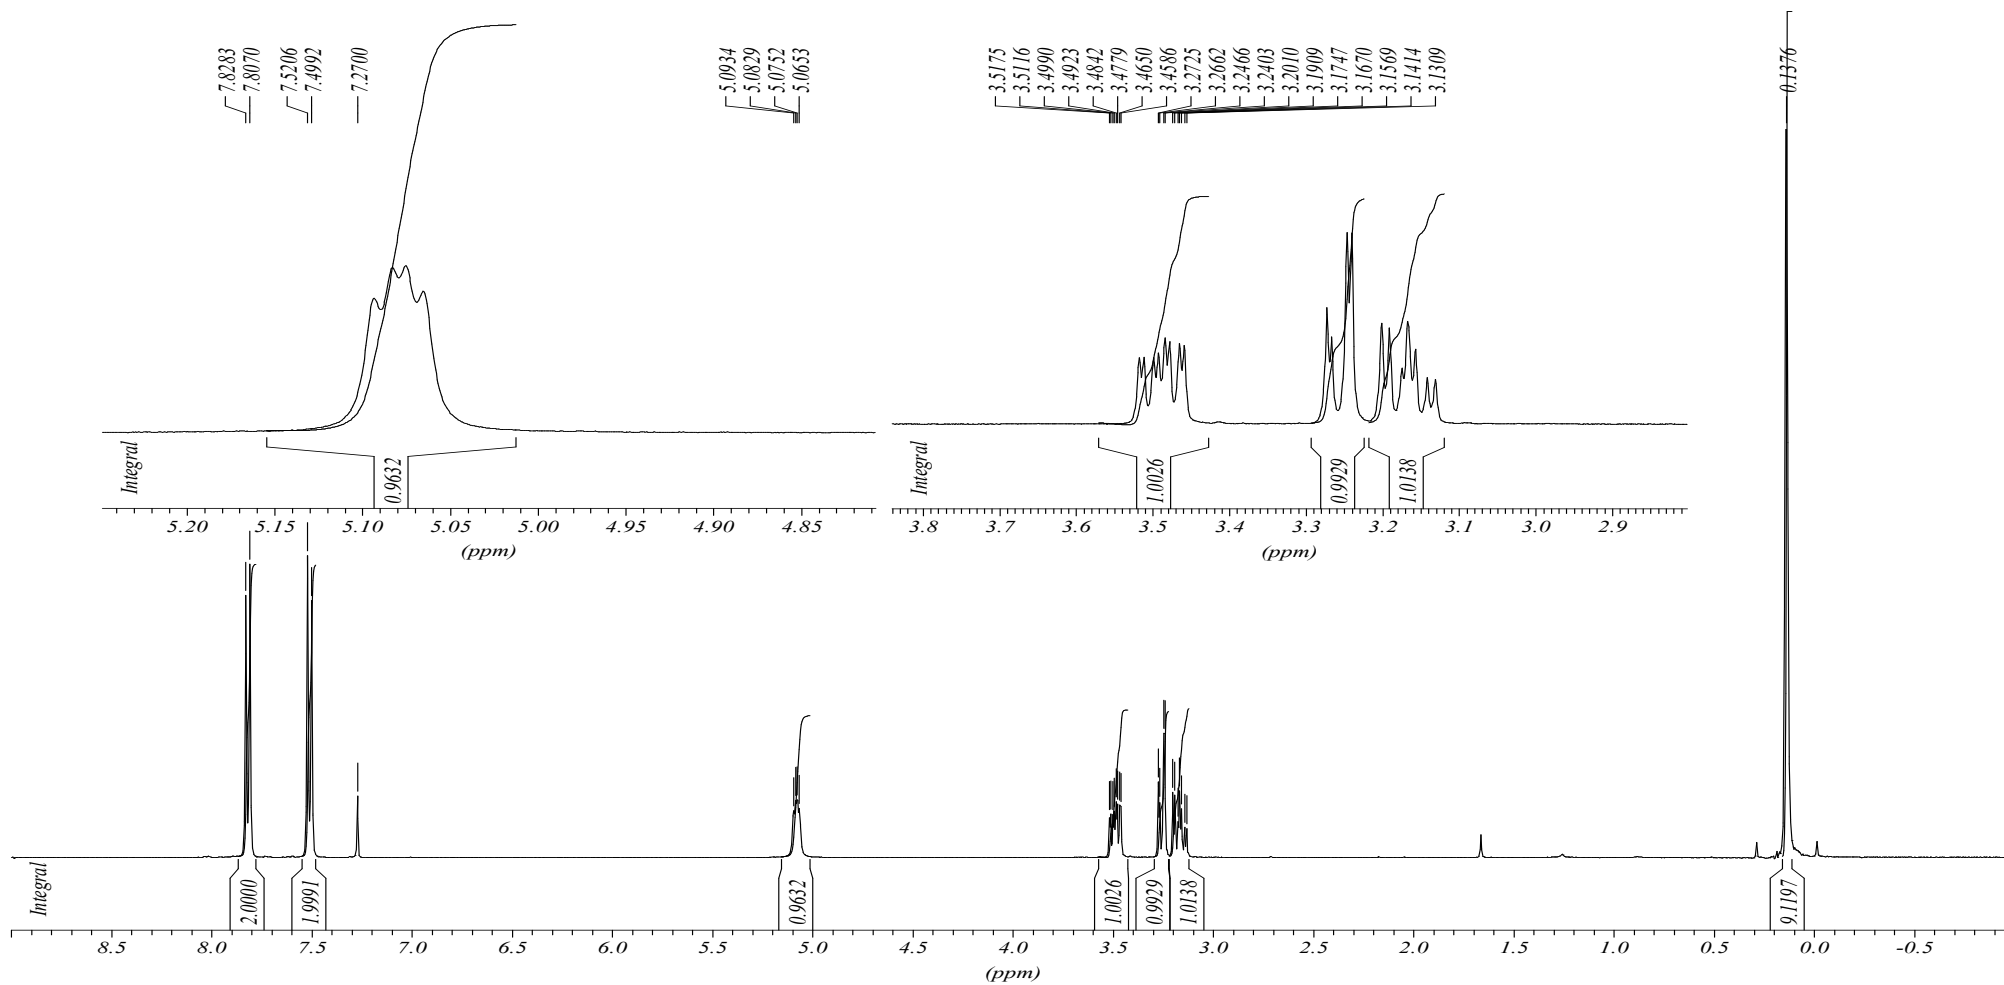

$^{13}\text{C}$  NMR spectrum of compound, **3f**

*N*-(2-bromo-2-(trimethylsilyl)ethyl)-4-chlorobenzenesulfonamide, **3f**

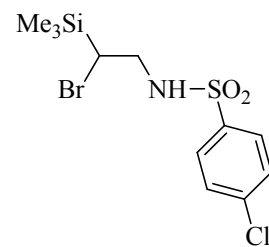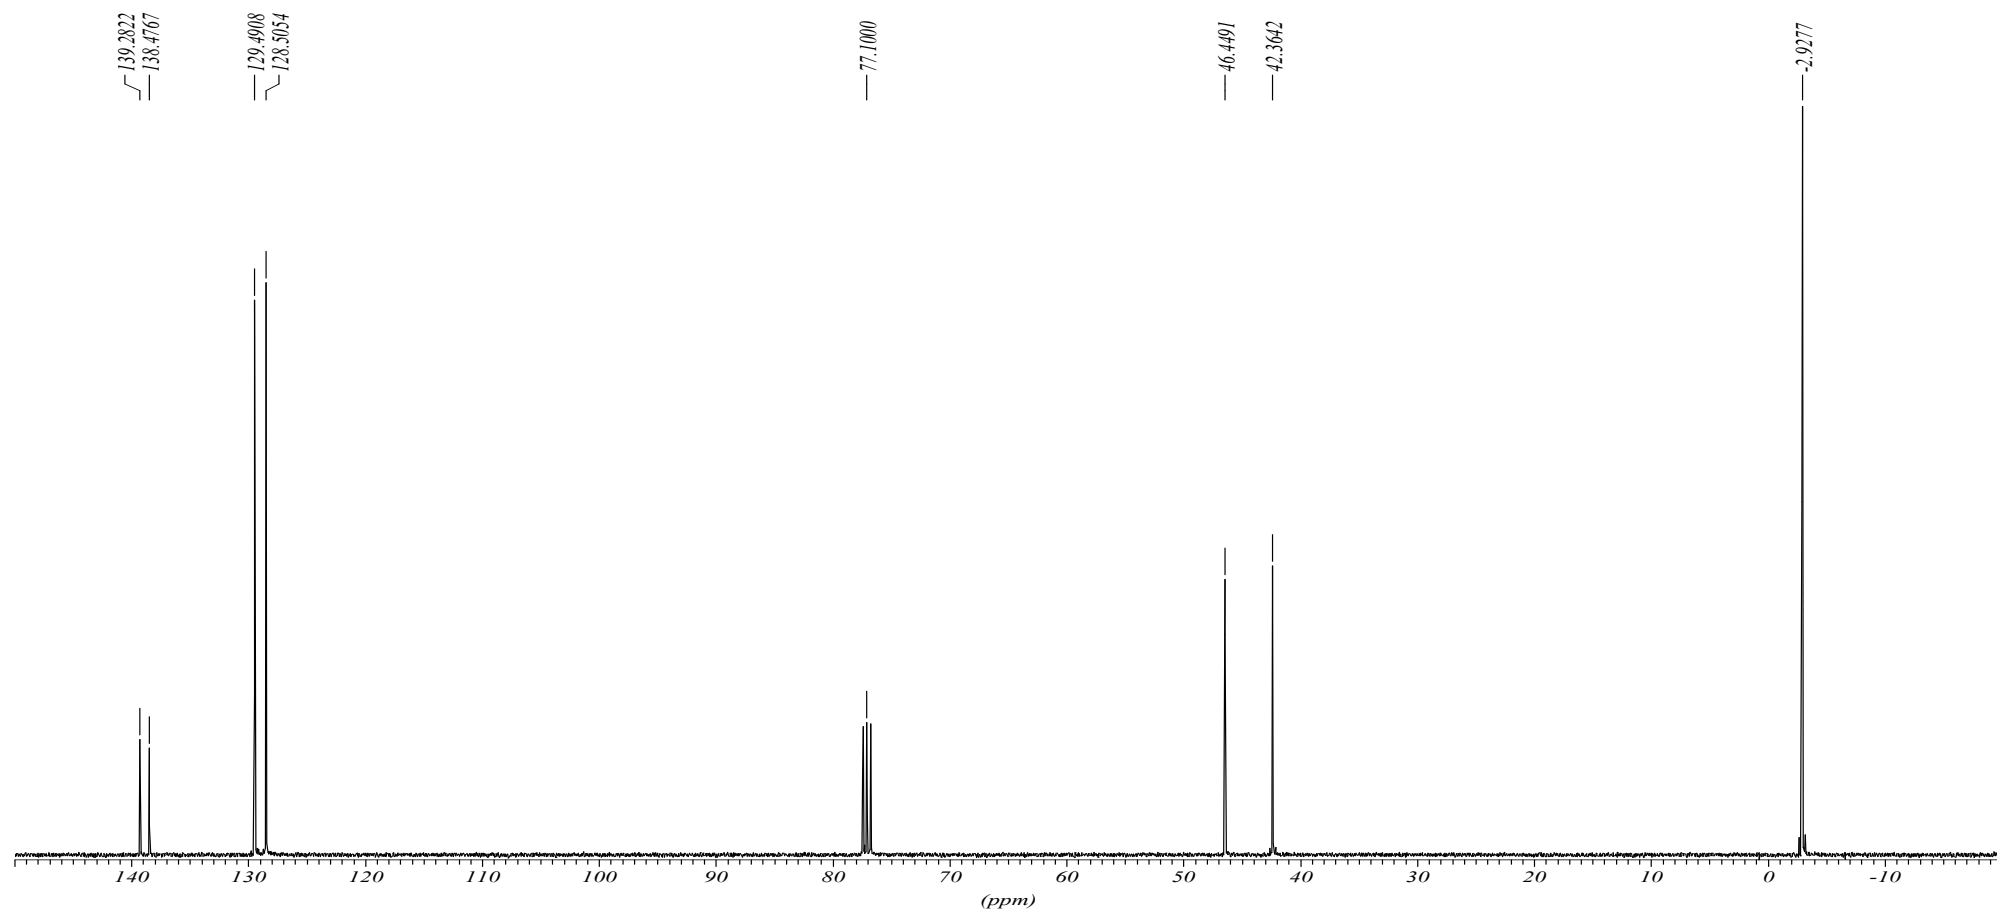

# <sup>1</sup>H NMR spectrum of compound **3g**

4-bromo-N-(2-bromo-2-(trimethylsilyl)ethyl)benzenesulfonamide, **3g**

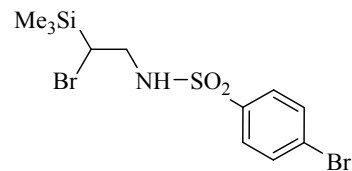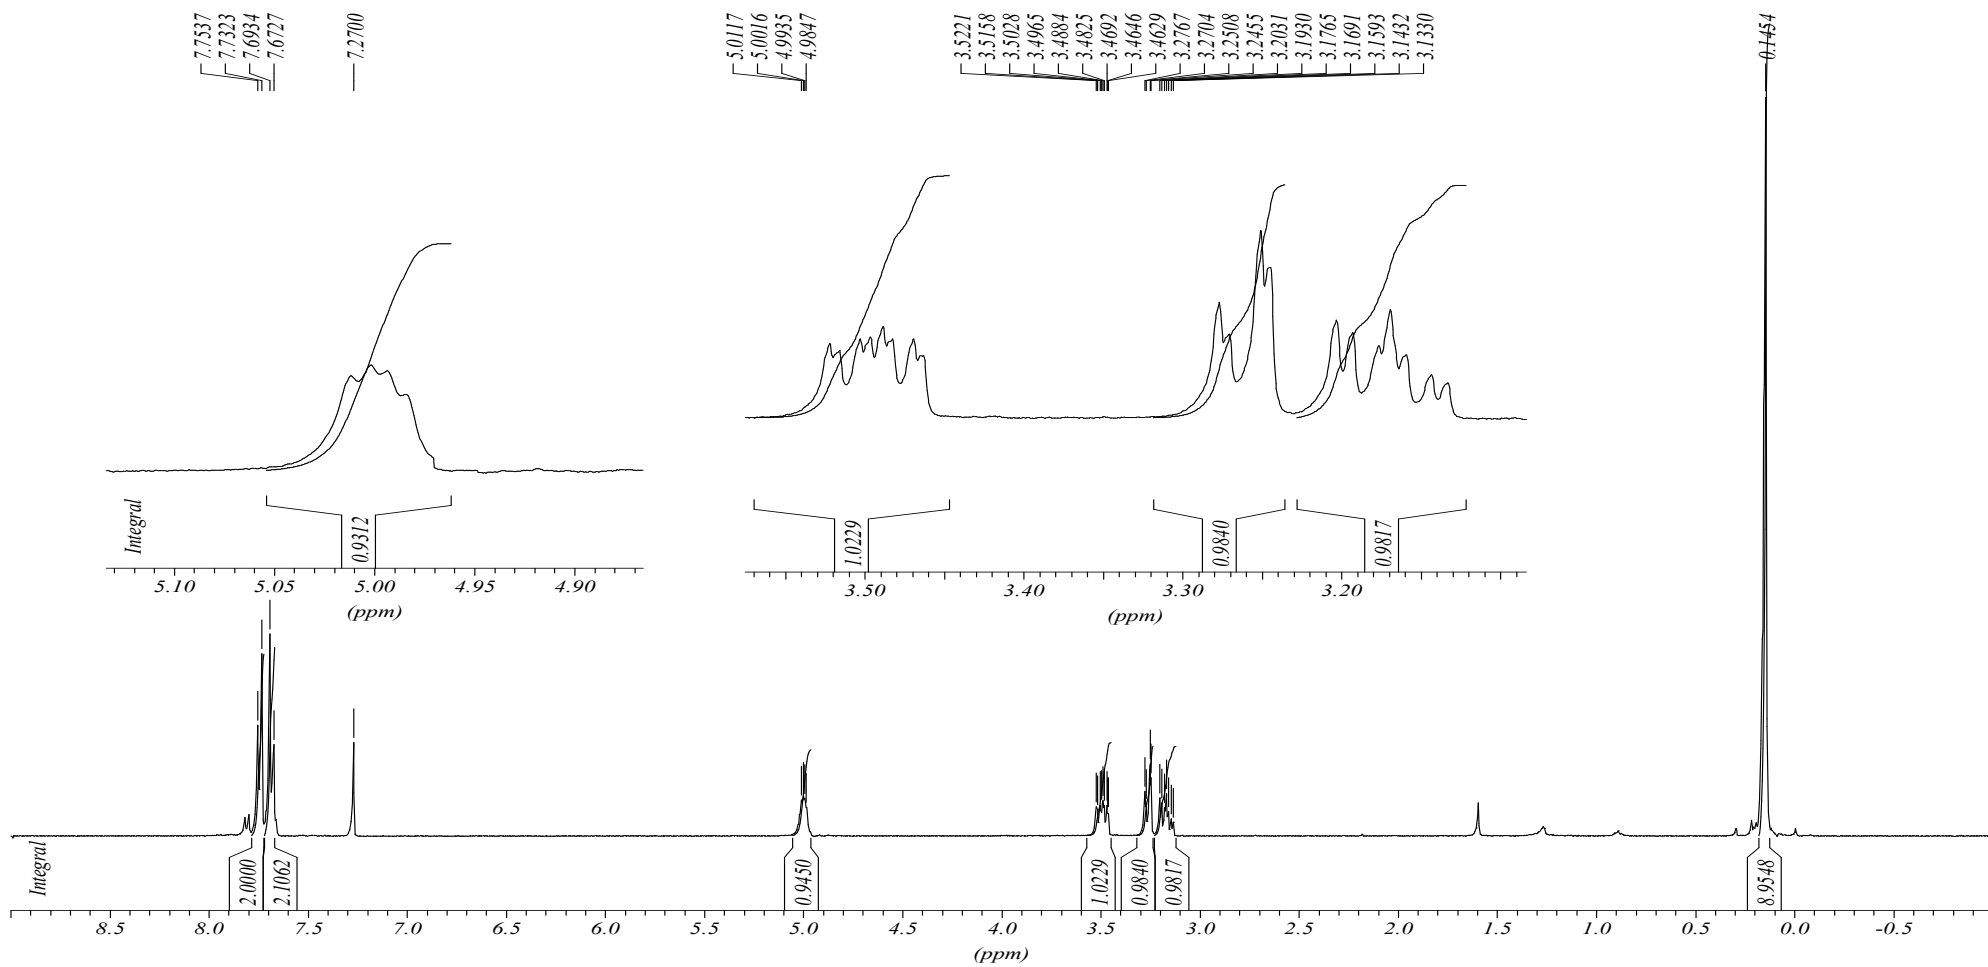



<sup>13</sup>C NMR spectrum of compound, **3g**

*4-bromo-N-(2-bromo-2-(trimethylsilyl)ethyl)benzenesulfonamide, 3g*

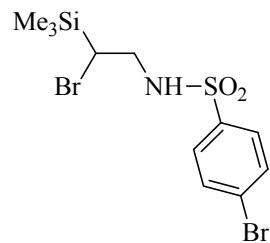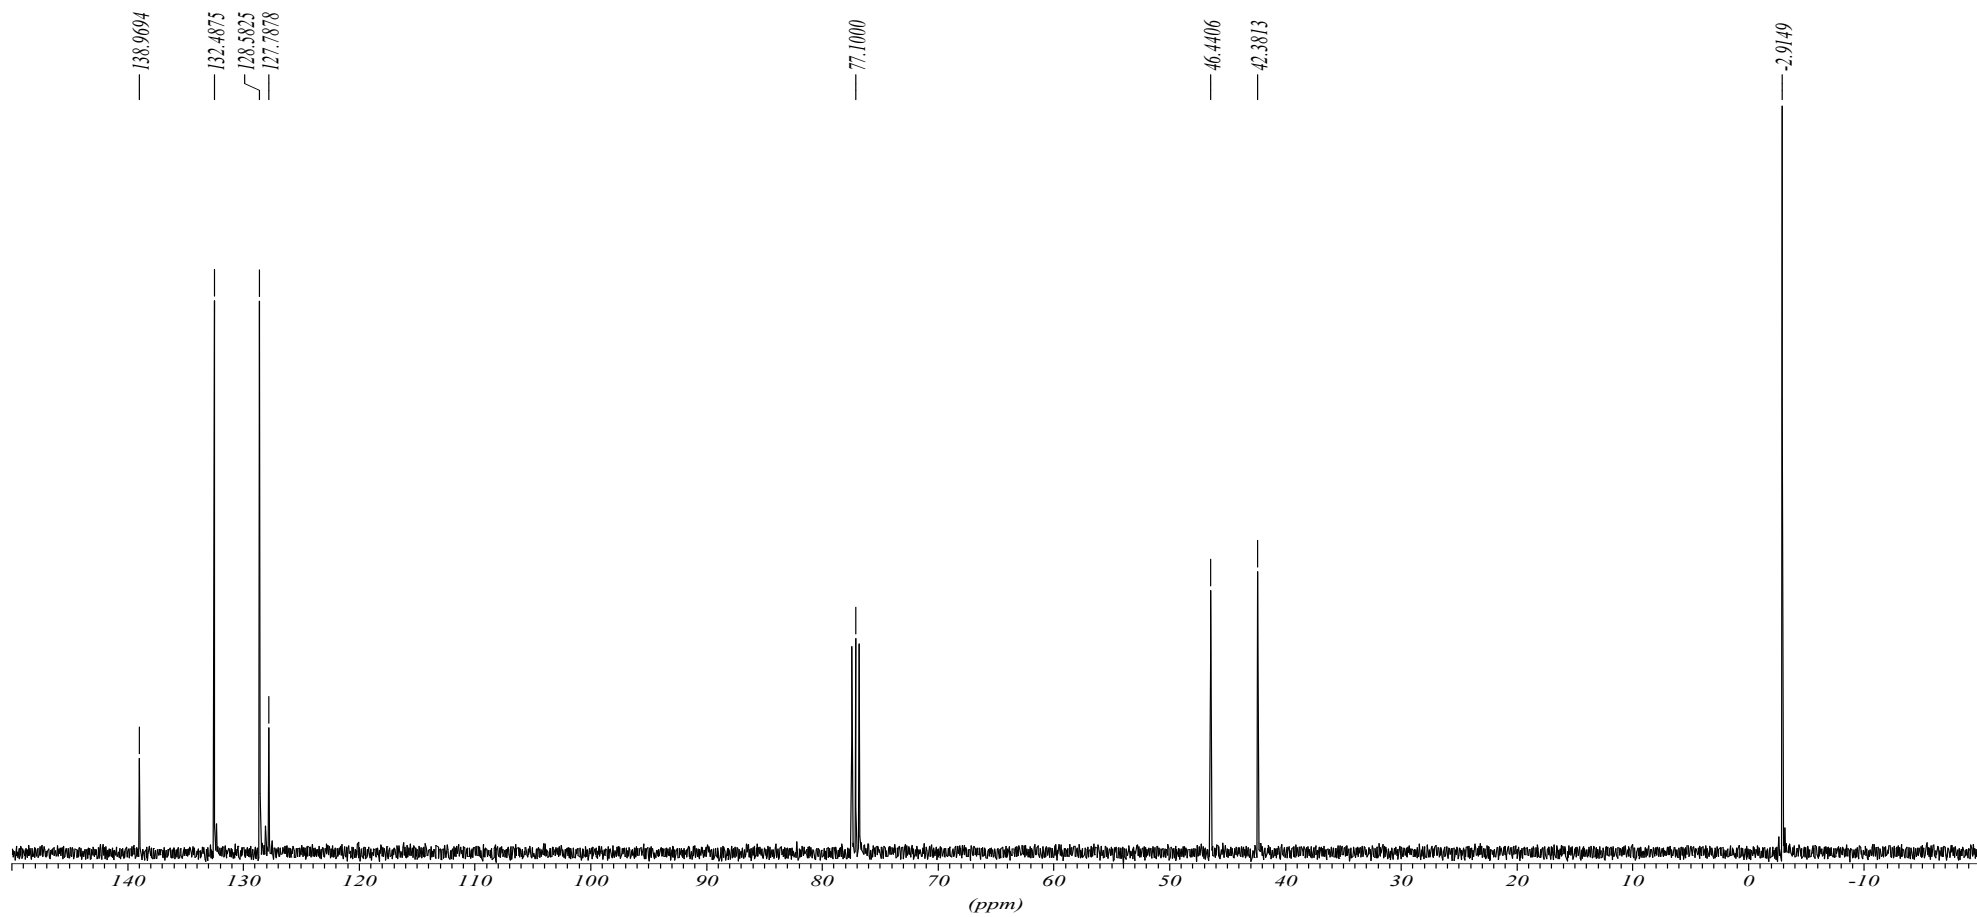

# <sup>1</sup>H NMR spectrum of compound **3h**

*N*-(2-bromo-2-(trimethylsilyl)ethyl)-4-nitrobenzenesulfonamide, **3h**

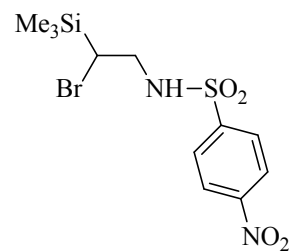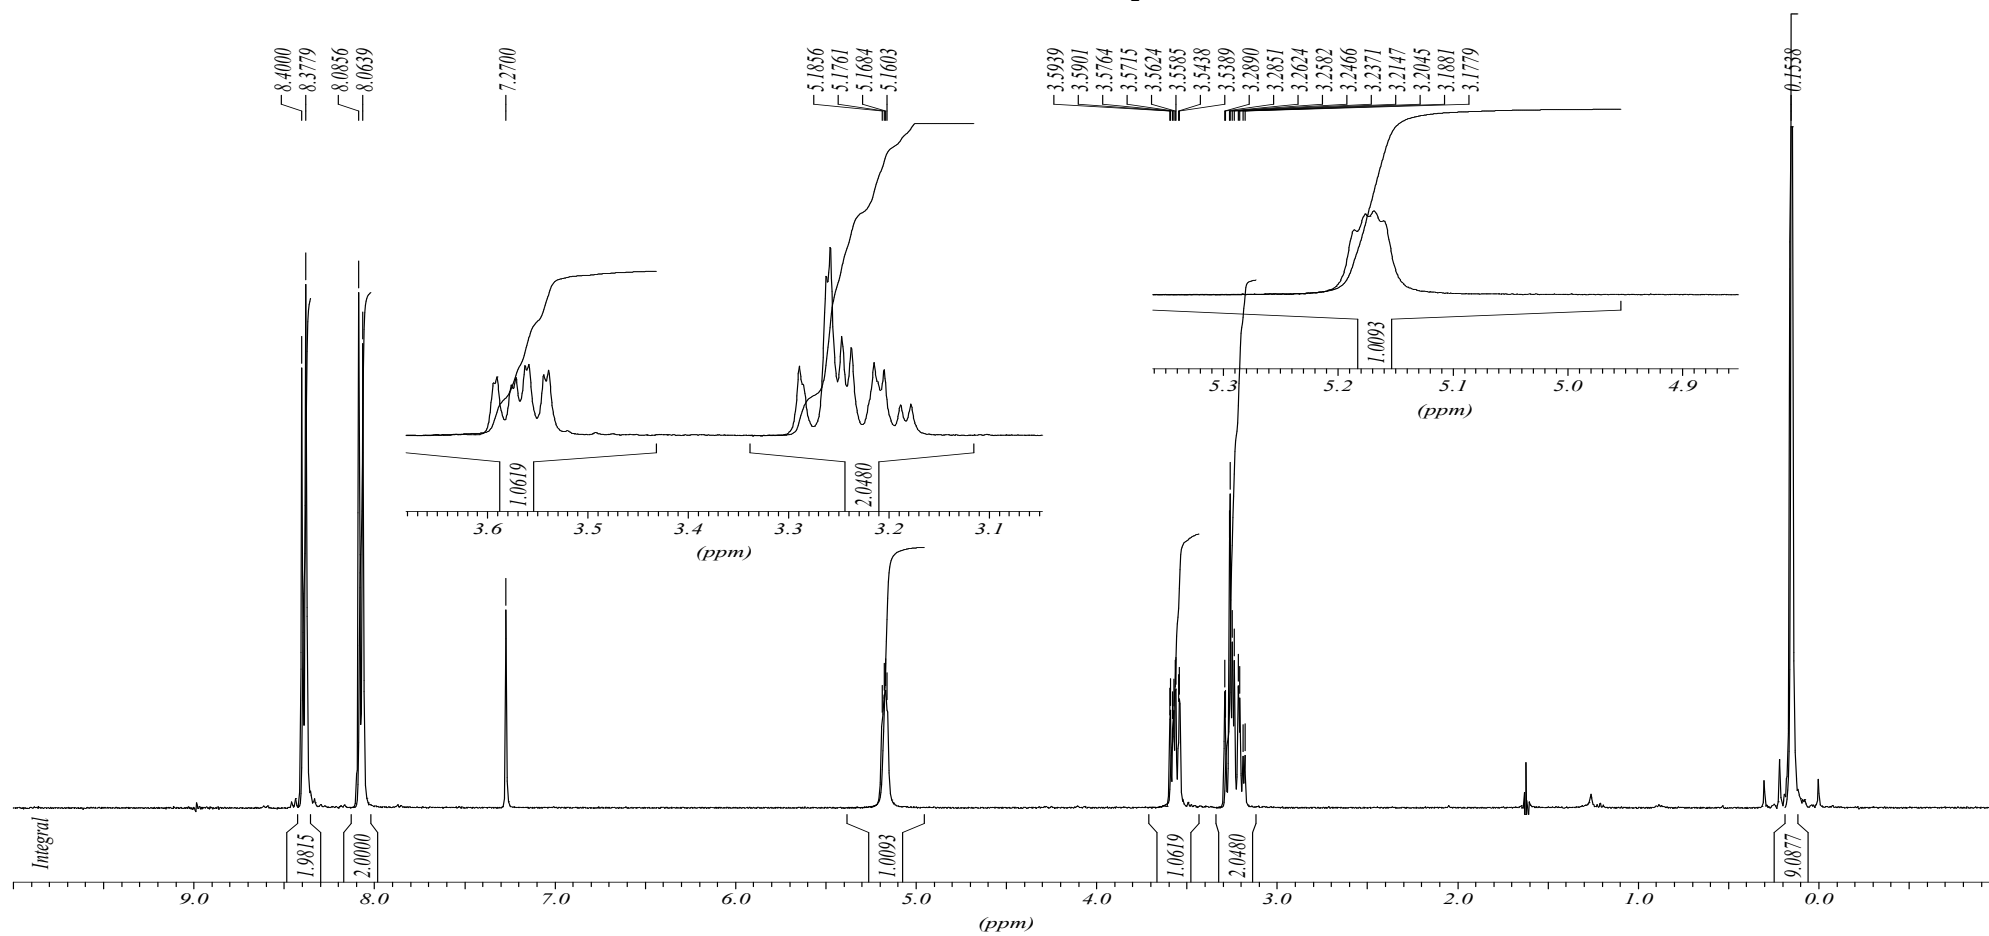

$^{13}\text{C}$  NMR spectrum of compound, **3h**

*N*-(2-bromo-2-(trimethylsilyl)ethyl)-4-nitrobenzenesulfonamide, **3h**

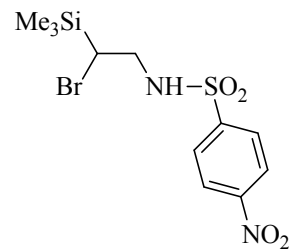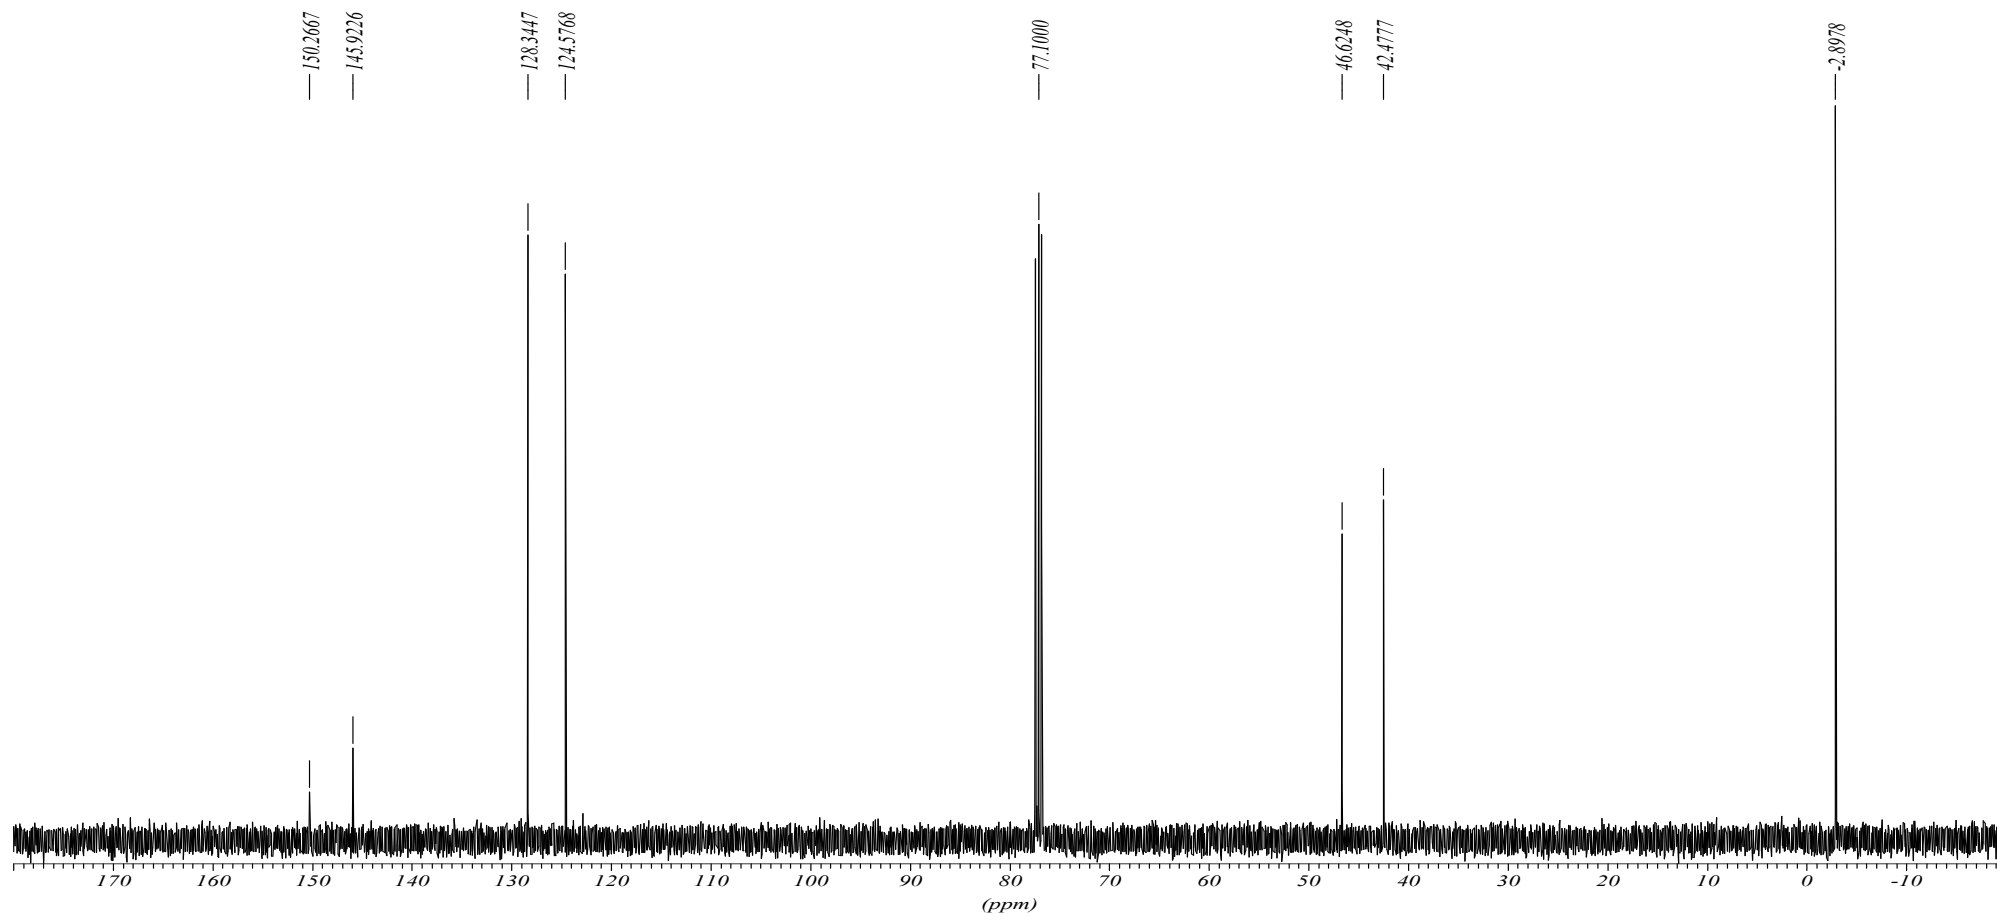

<sup>1</sup>H NMR spectrum of compound **7a**

*N*-(2-bromo-2-(trimethylsilyl)ethyl)-*N'*-((trifluoromethyl)sulfonyl)acetimidamide, **7a**

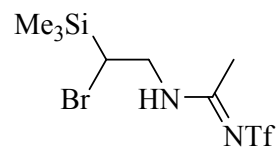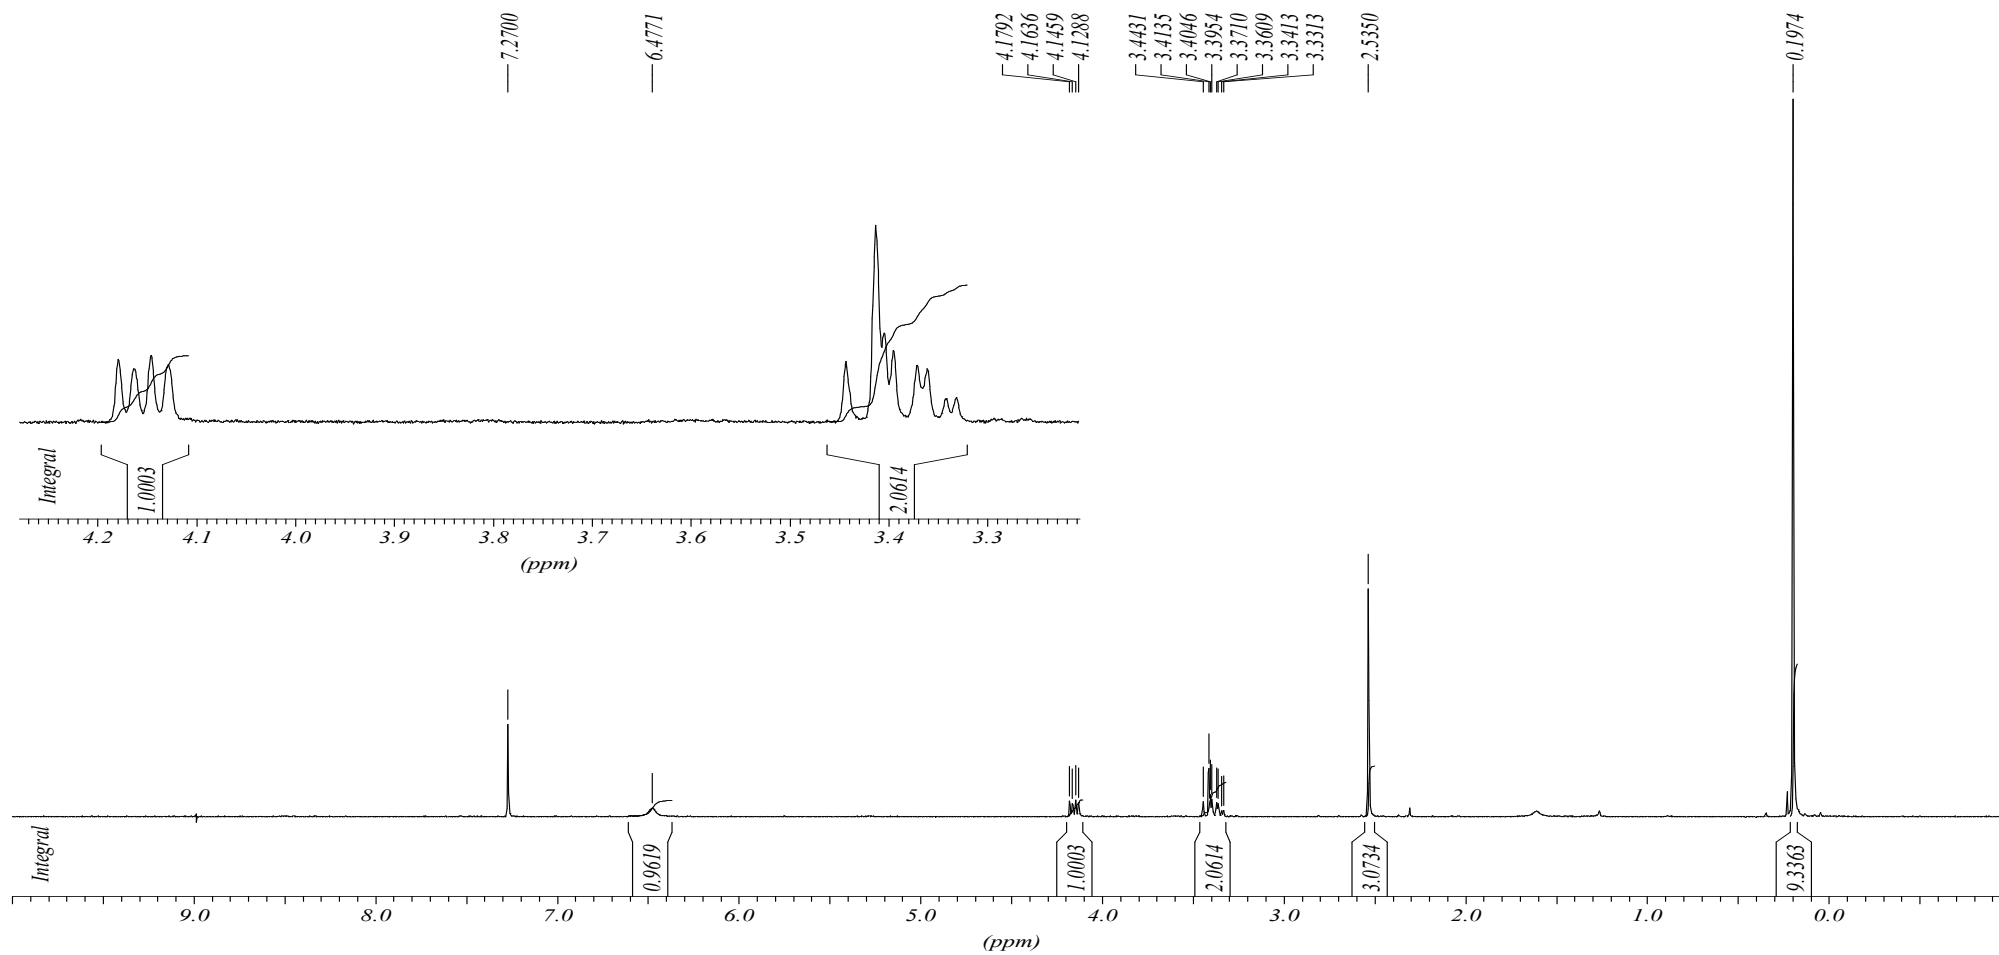

<sup>13</sup>C NMR spectrum of compound **7a**

*N*-(2-bromo-2-(trimethylsilyl)ethyl)-*N'*-((trifluoromethyl)sulfonyl)acetimidamide, **7a**

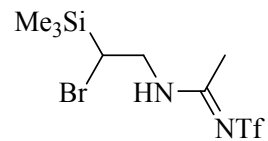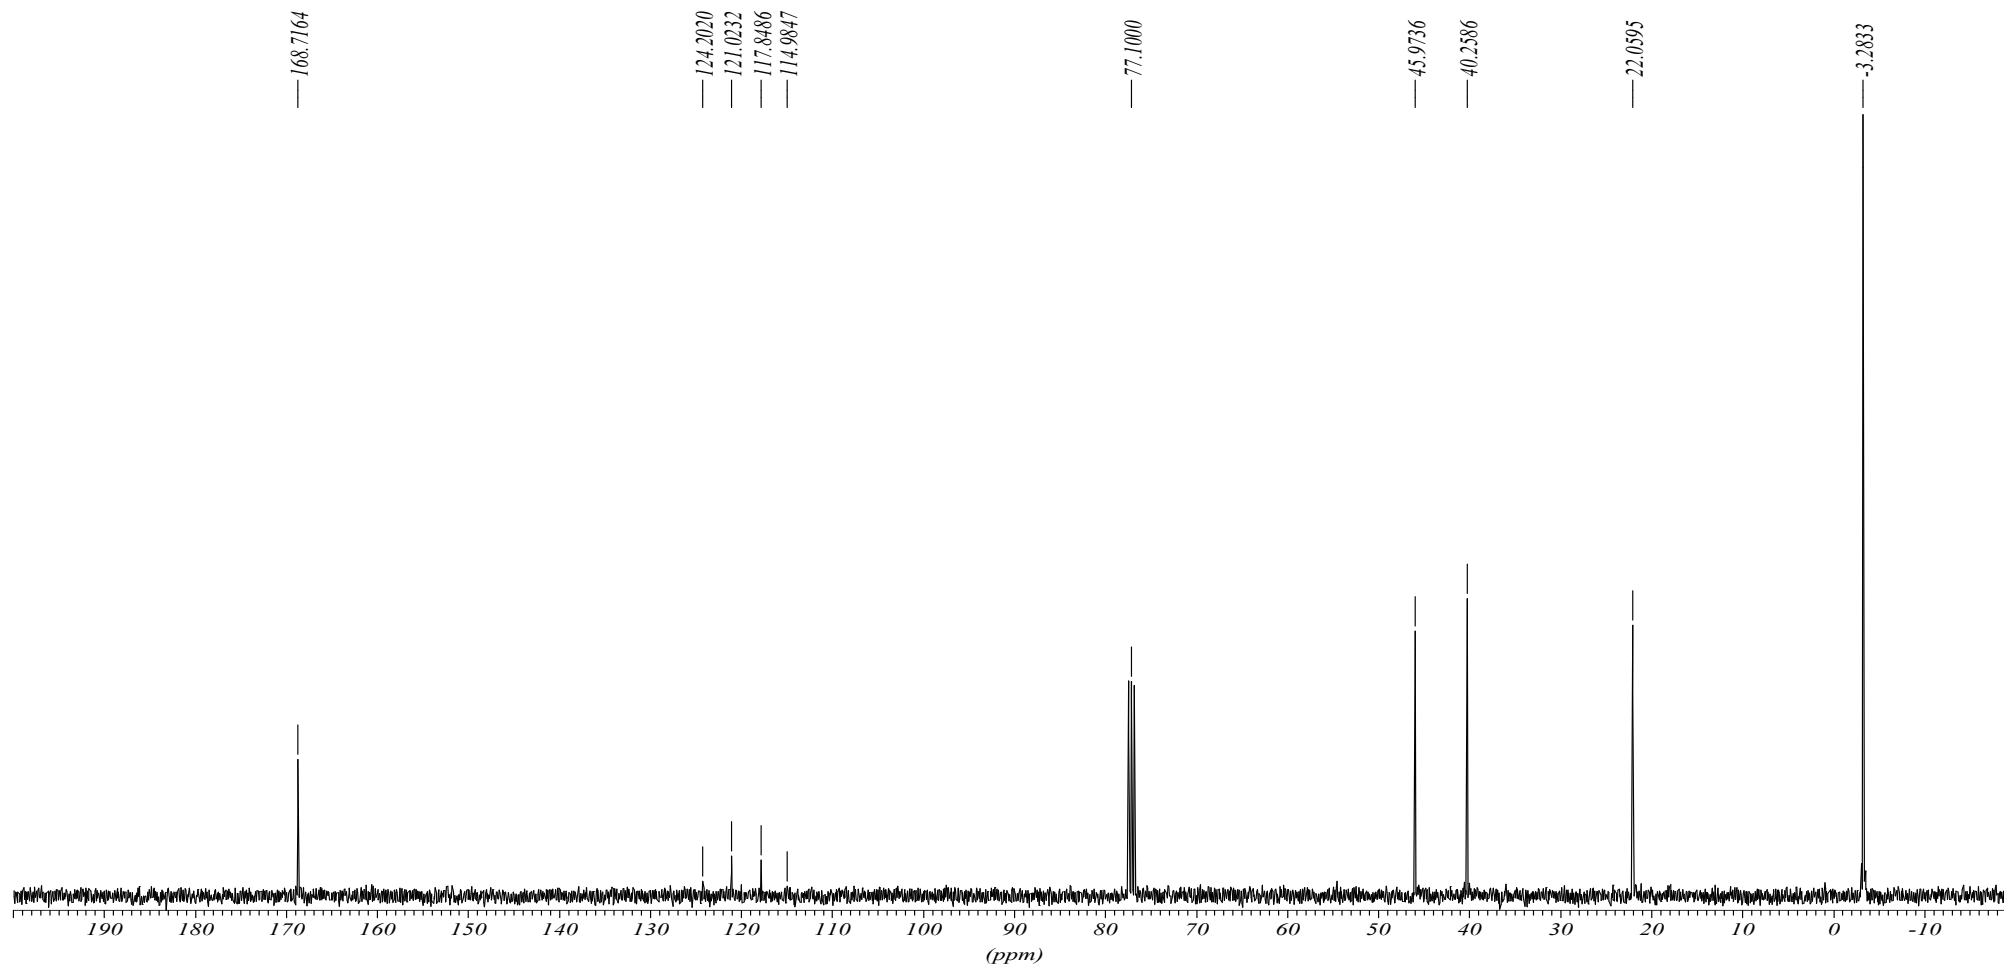

# <sup>1</sup>H NMR spectrum of compound **8a**

*N*-(4-(2-bromo-2-(trimethylsilyl)ethoxy)butyl)-1,1,1-trifluoromethanesulfonamide, **8a**

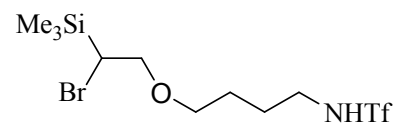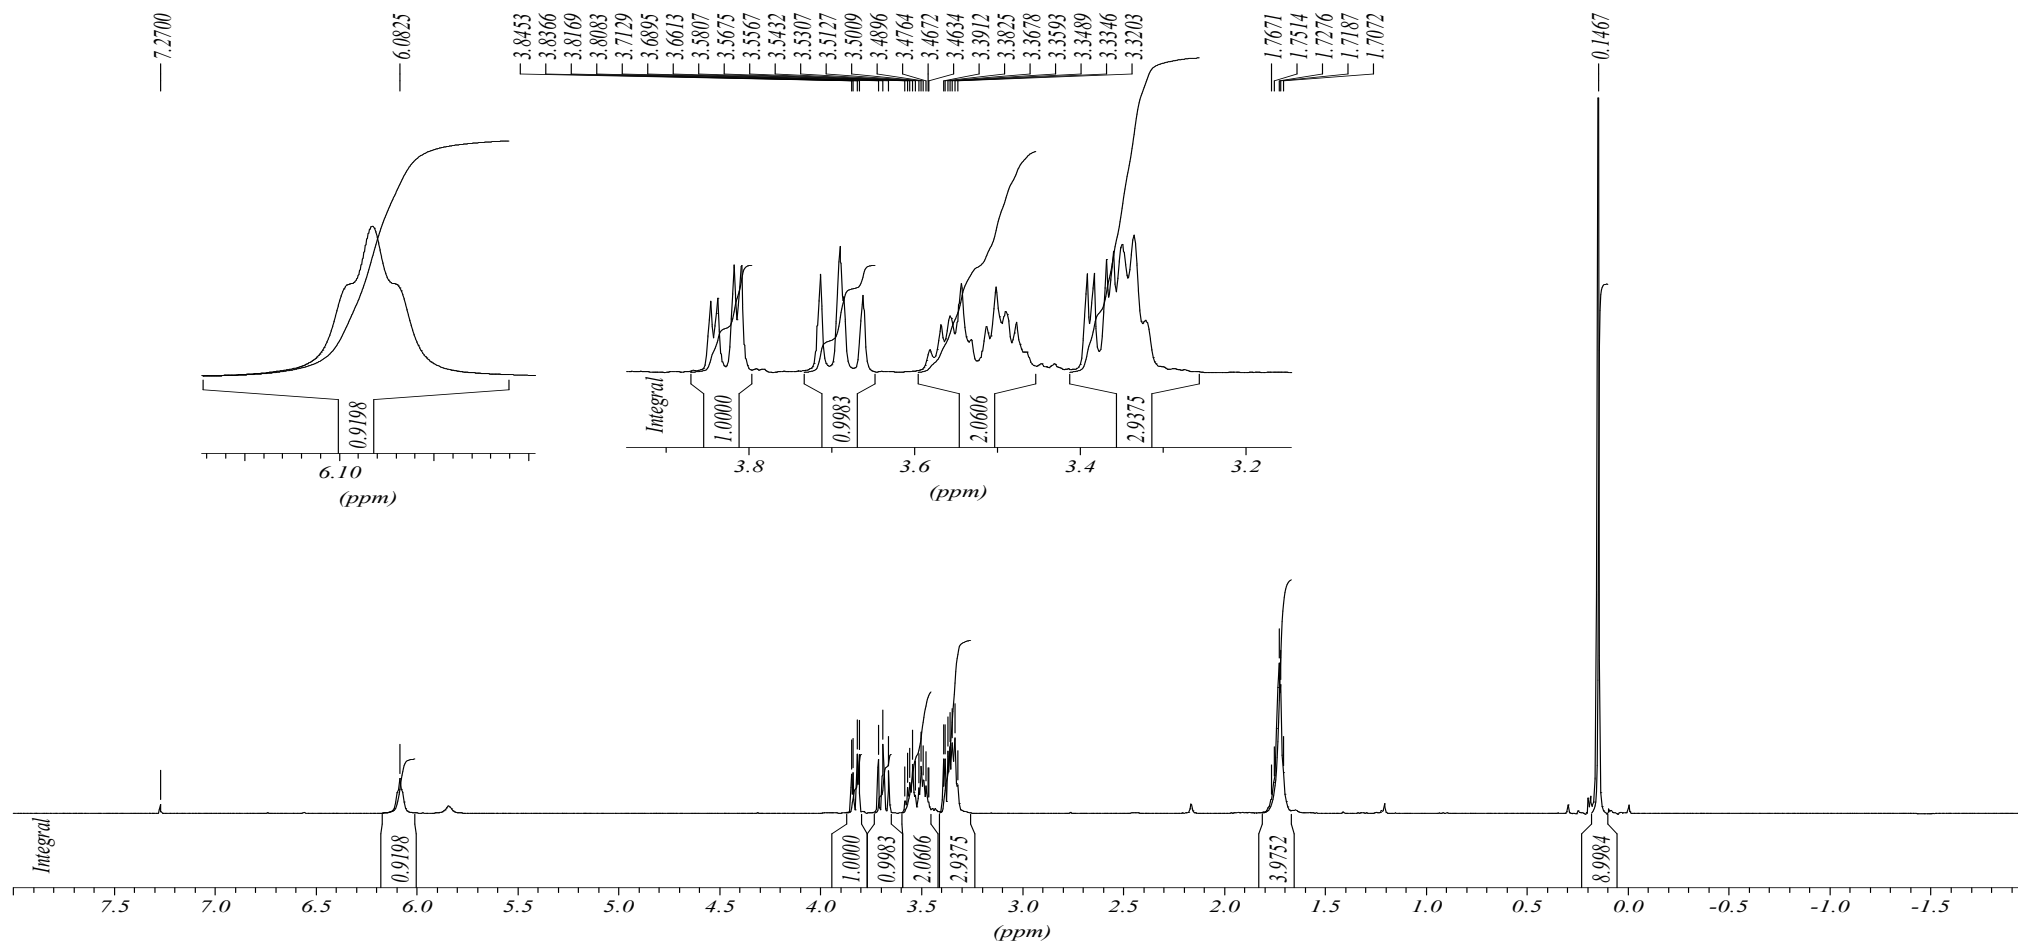

<sup>13</sup>C NMR spectrum of compound **8a**

*N*-(4-(2-bromo-2-(trimethylsilyl)ethoxy)butyl)-1,1,1-trifluoromethanesulfonamide, **8a**

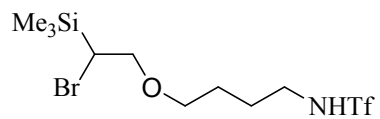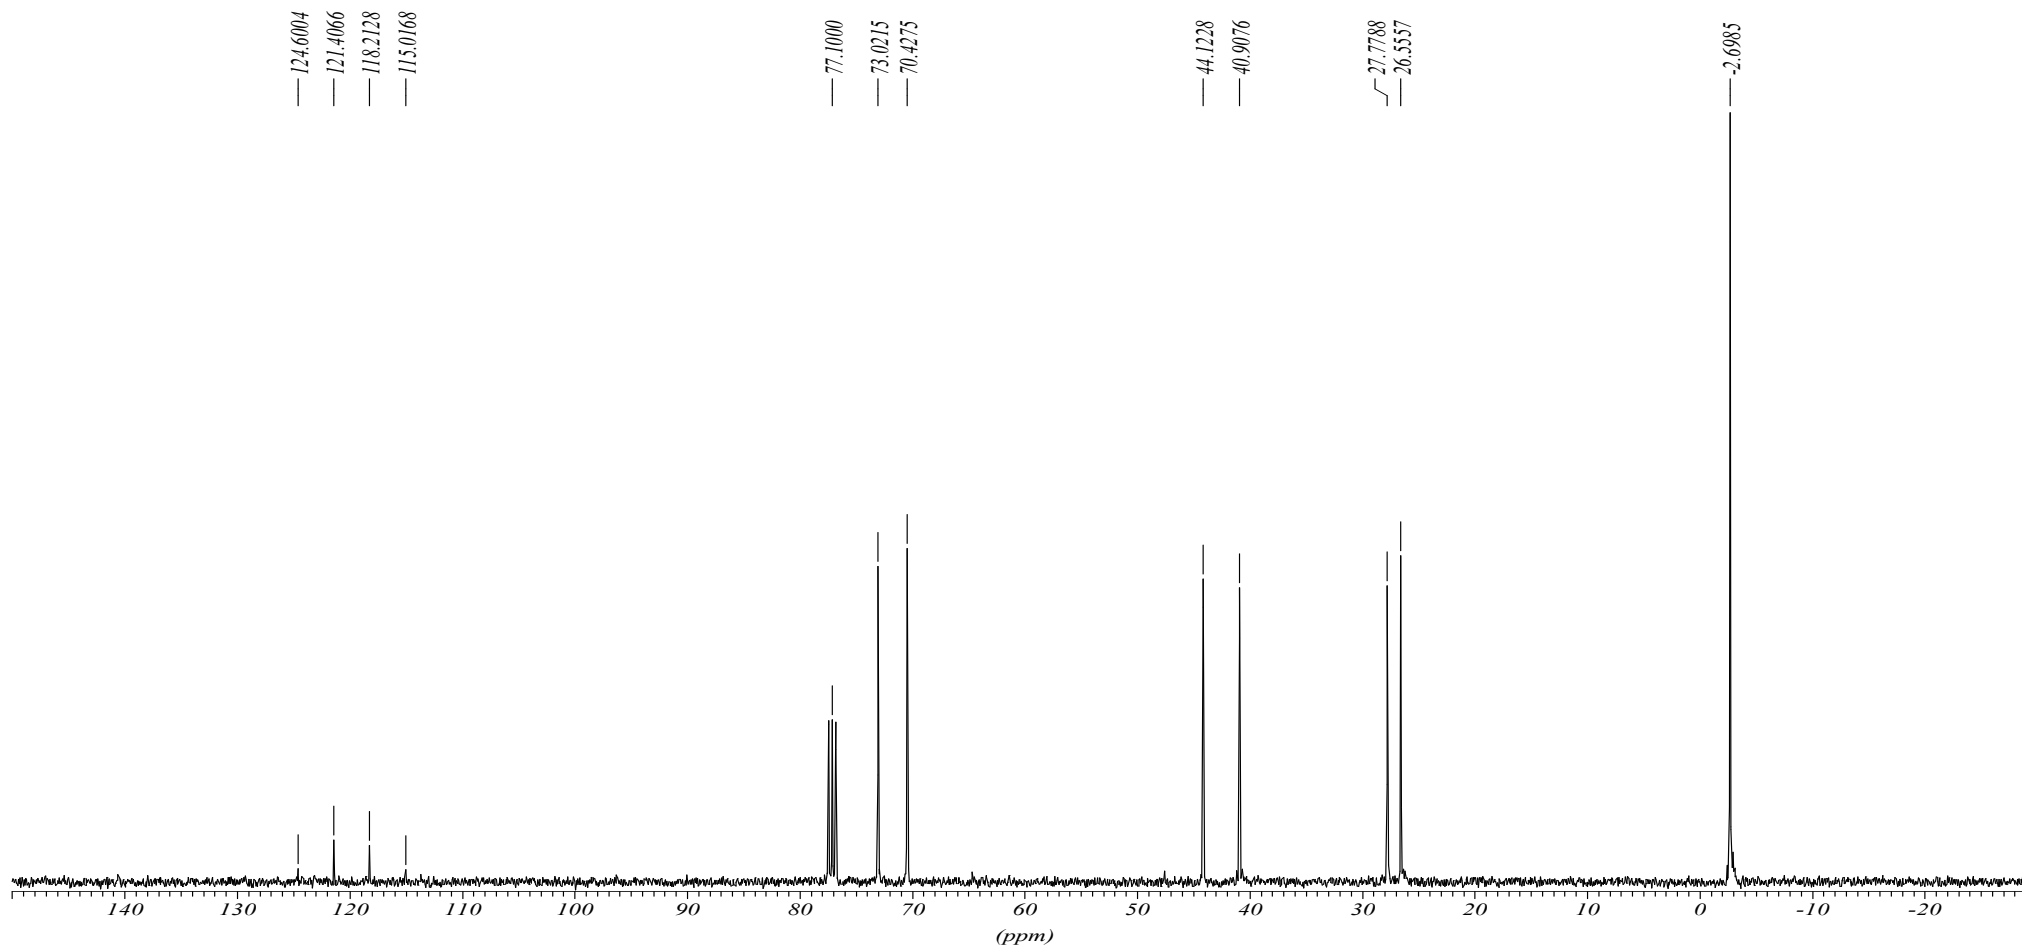

# <sup>1</sup>H NMR spectrum of compound **8d**

*N*-(4-(2-bromo-2-(trimethylsilyl)ethoxy)butyl)-4-methylbenzenesulfonamide, **8d**

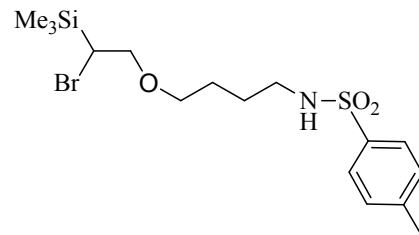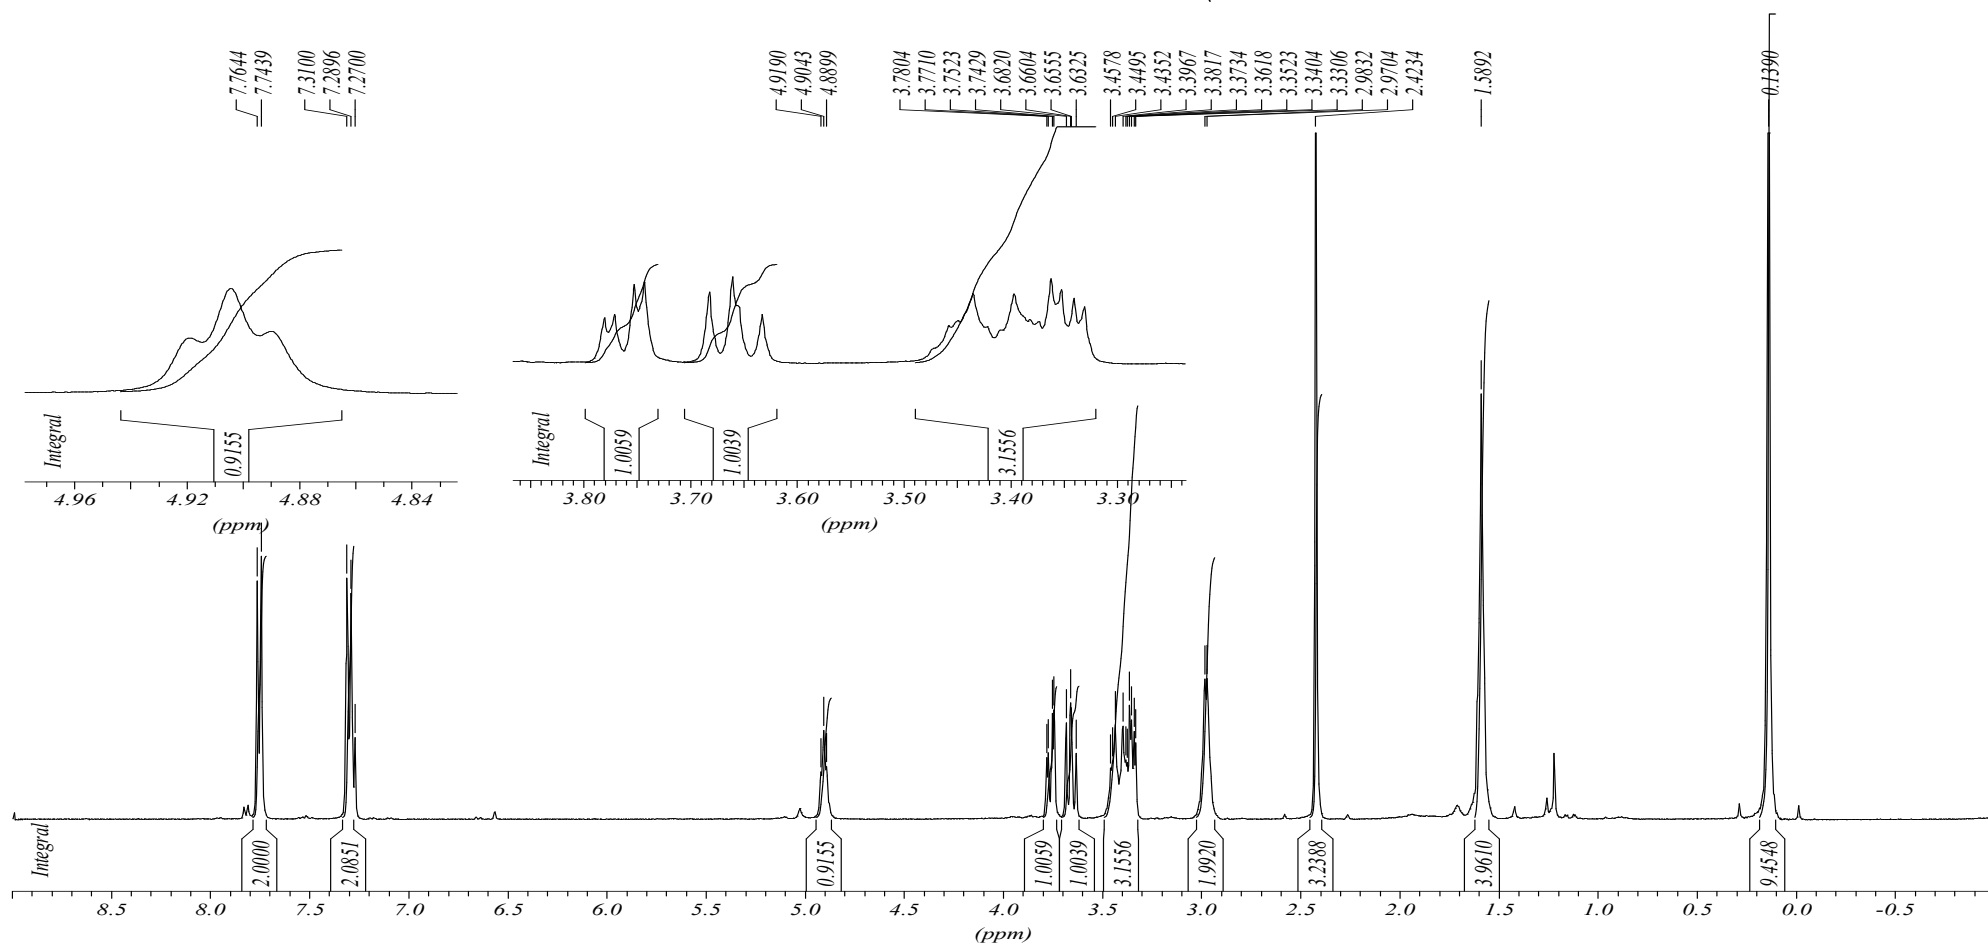



<sup>13</sup>C NMR spectrum of compound **8d**

*N*-(4-(2-bromo-2-(trimethylsilyl)ethoxy)butyl)-4-methylbenzenesulfonamide, **8d**

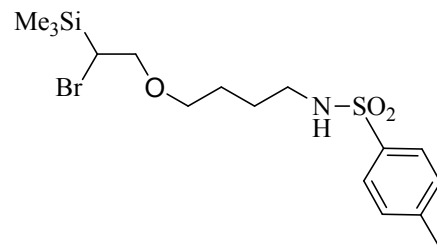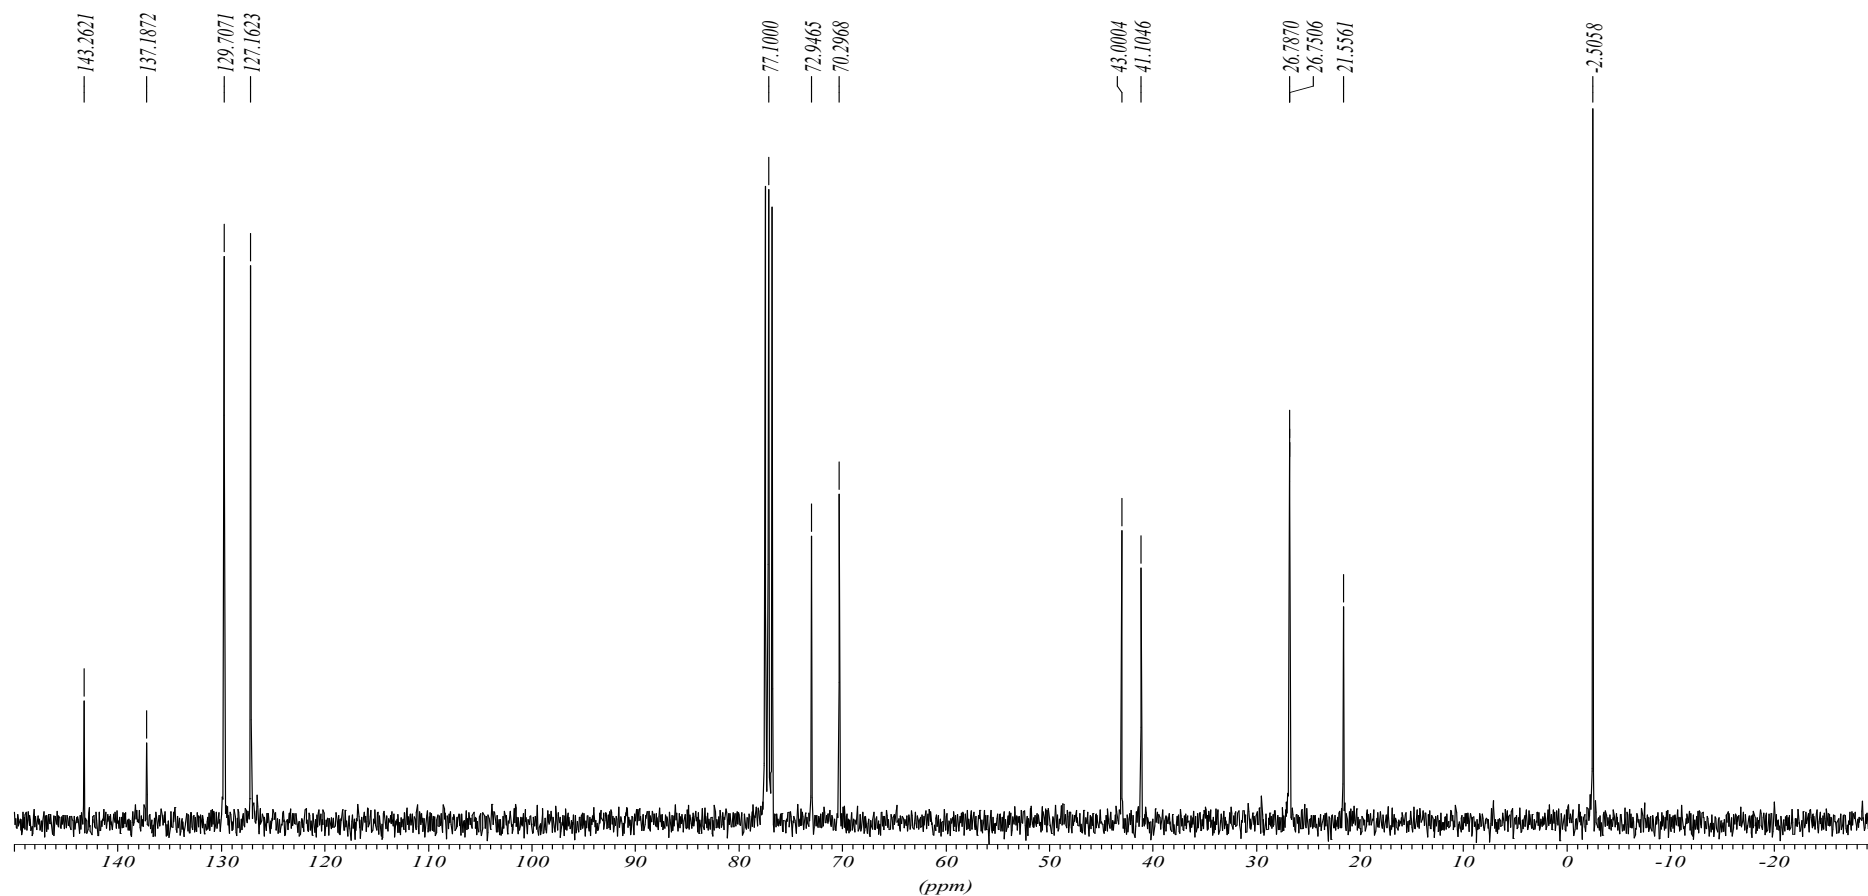

# $^1\text{H}$ NMR spectrum of compound **8h**

*N*-(4-(2-Bromo-2-(trimethylsilyl)ethoxy)butyl)-4-nitrobenzenesulfonamide, **8h**

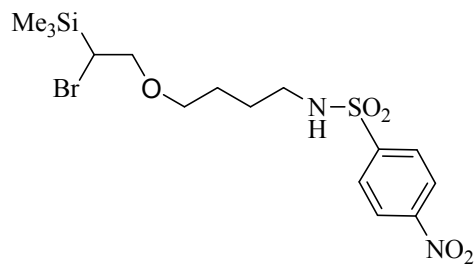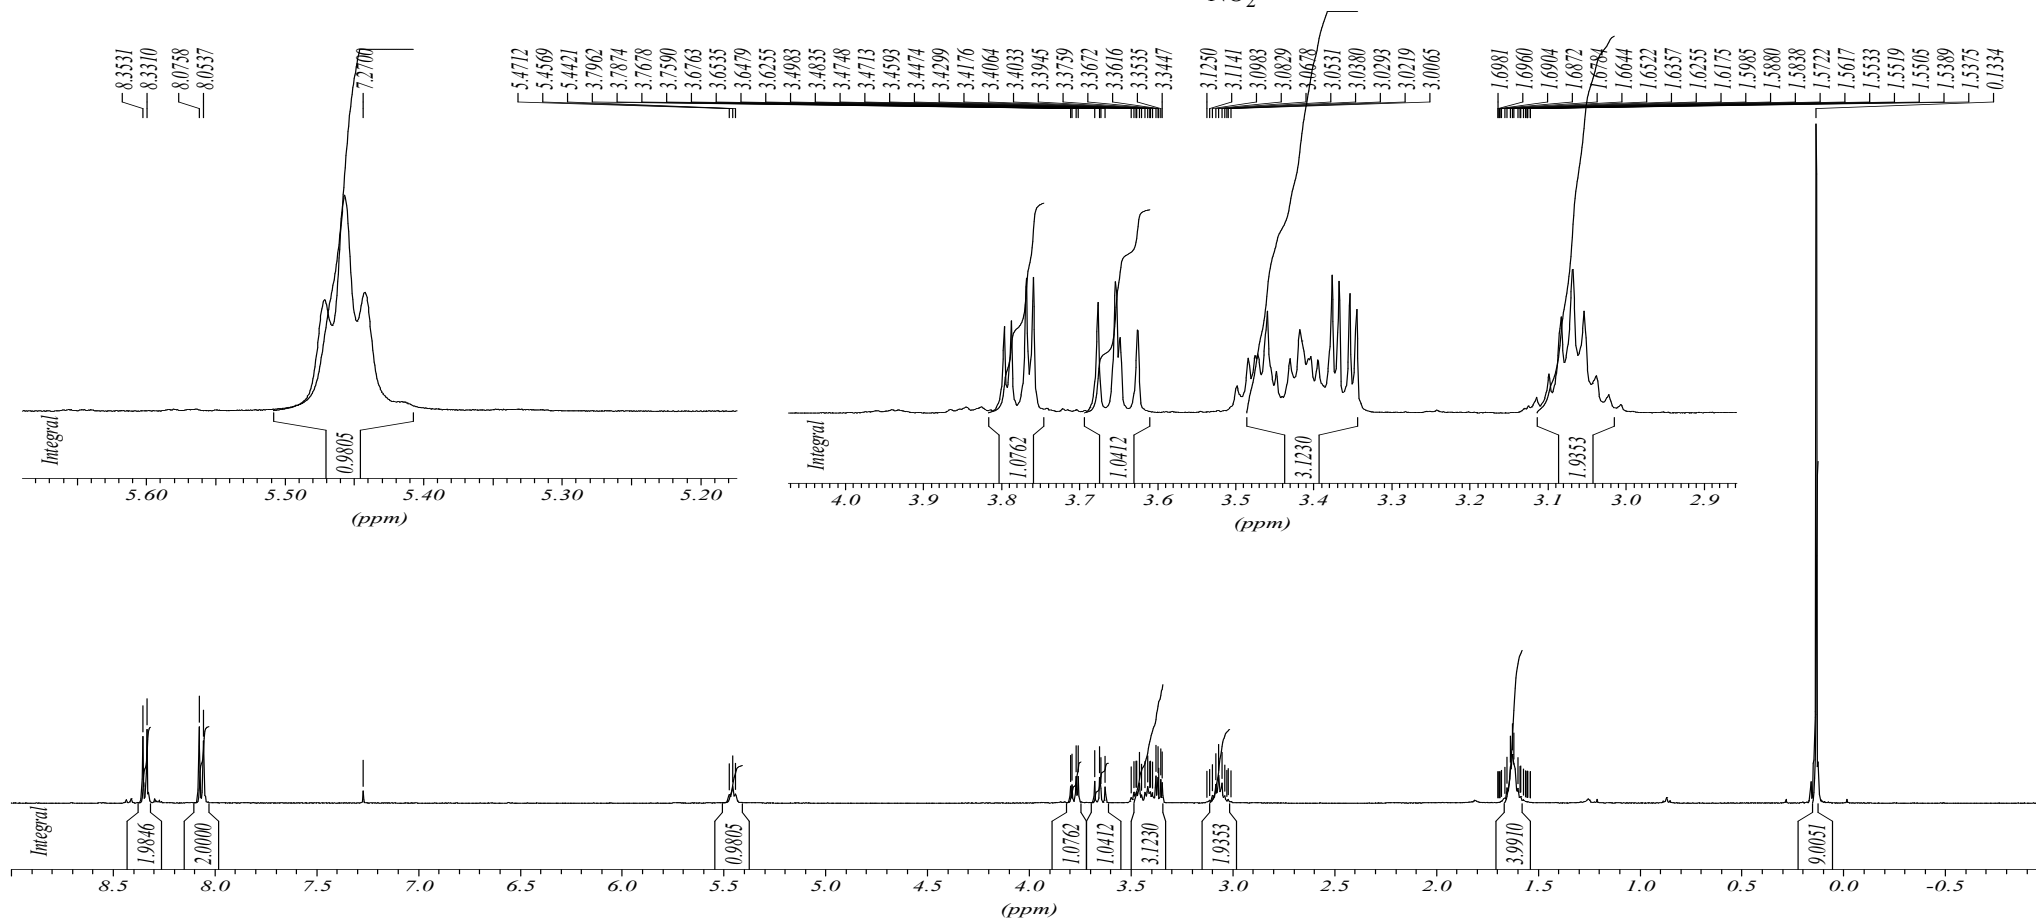

$^{13}\text{C}$  NMR spectrum of compound **8h**

*N*-(4-(2-Bromo-2-(trimethylsilyl)ethoxy)butyl)-4-nitrobenzenesulfonamide, **8h**

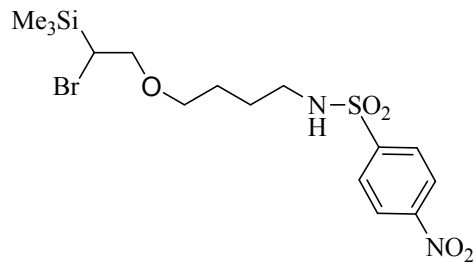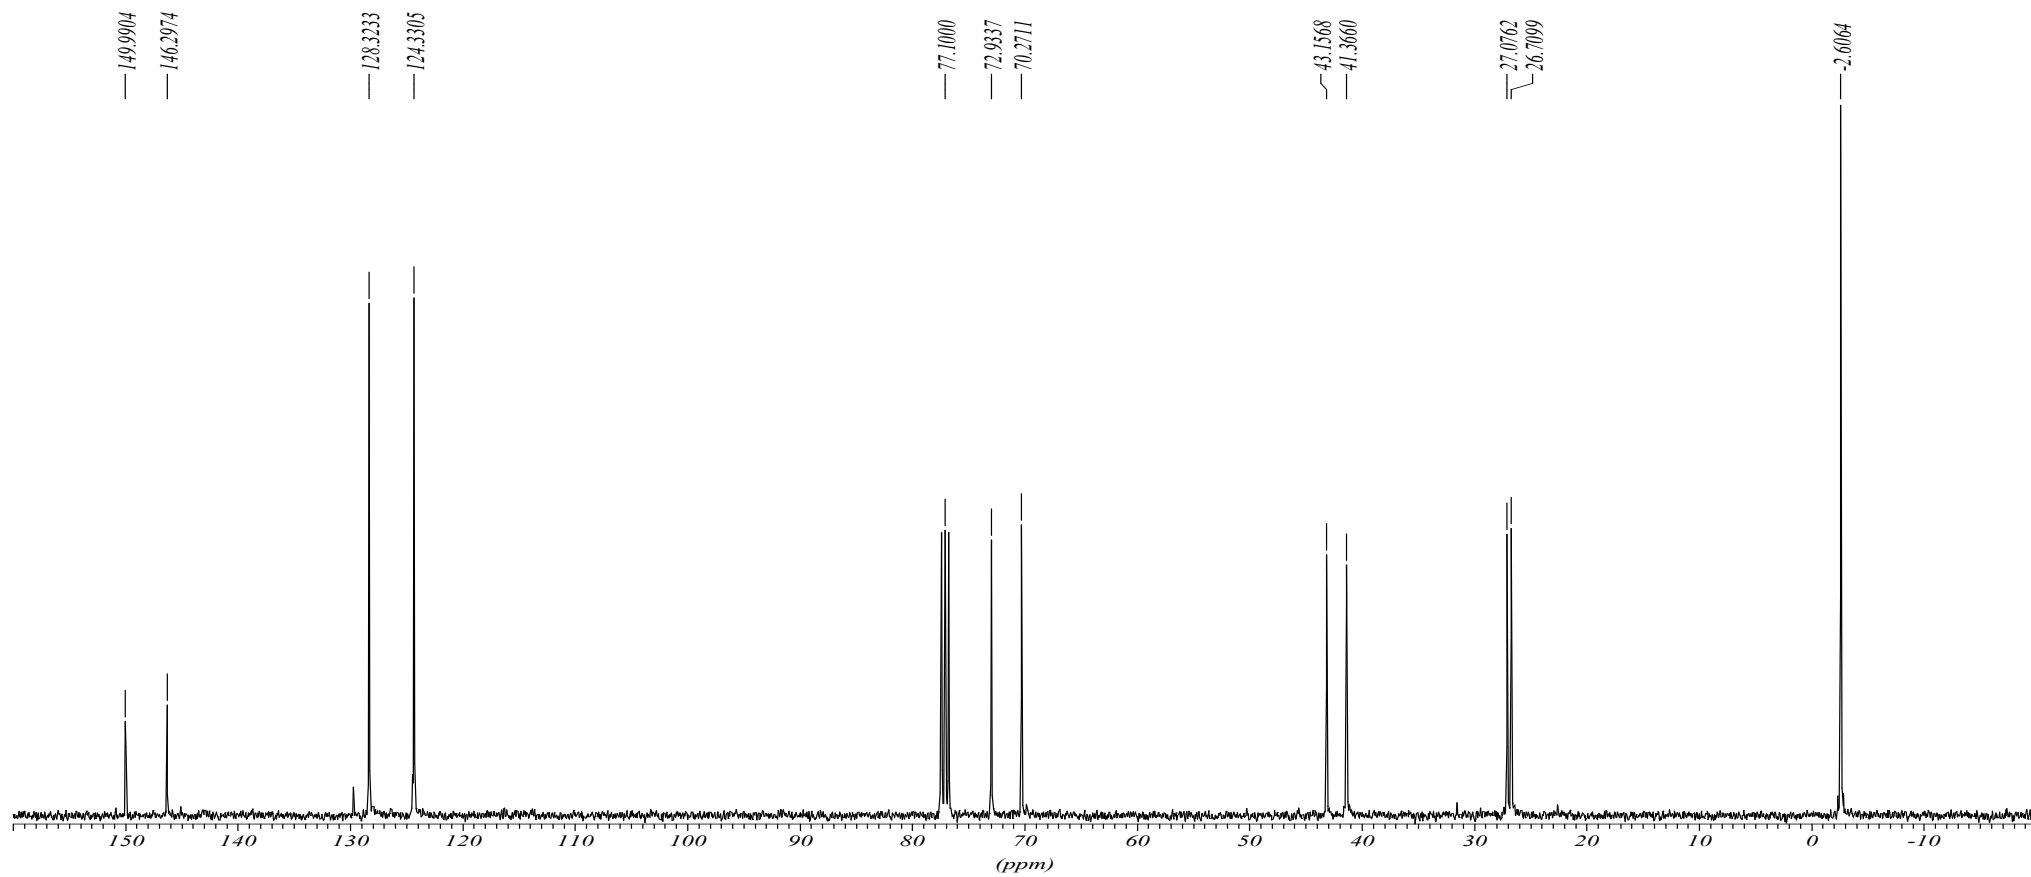

# <sup>1</sup>H NMR spectrum of compound **9**

(1-bromo-2-(4-bromobutoxy)ethyl)trimethylsilane, **9**

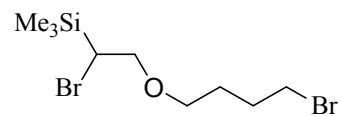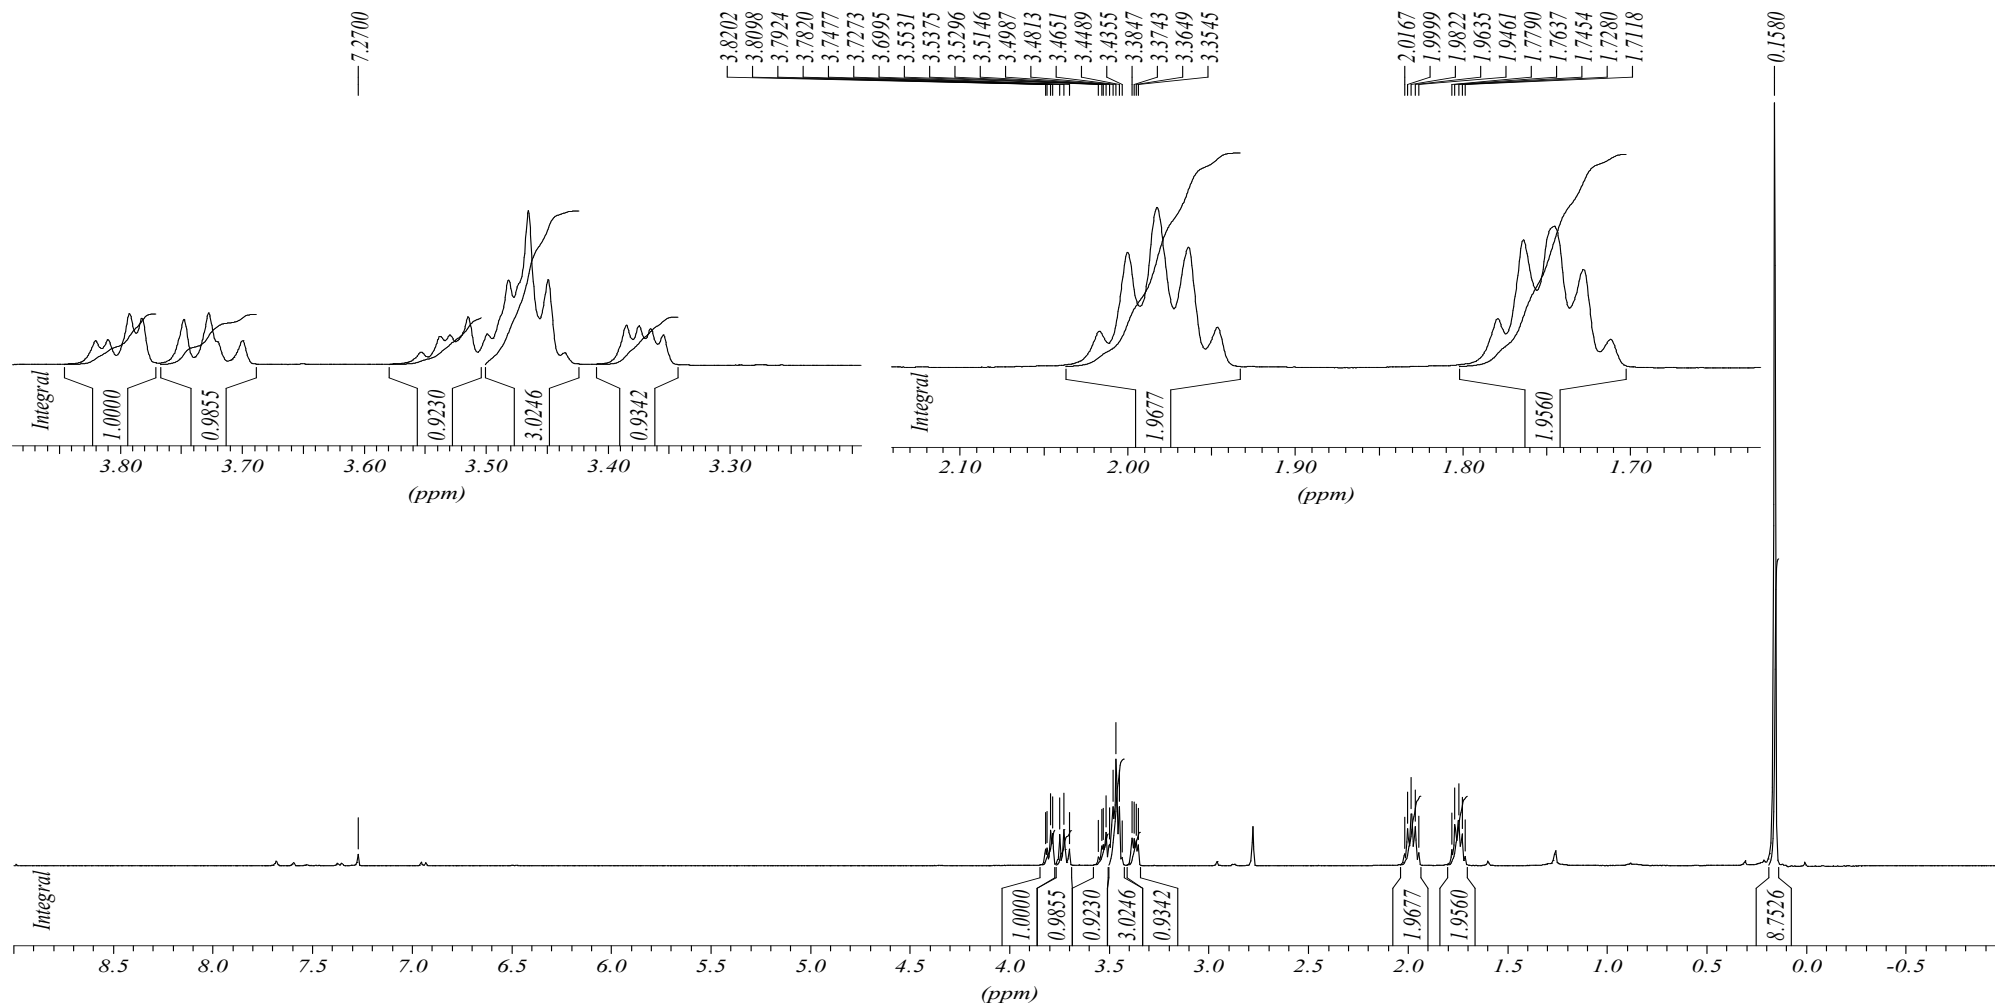

<sup>13</sup>C NMR spectrum of compound **9**

*1-bromo-2-(4-bromobutoxy)ethyl*trimethylsilane, **9**

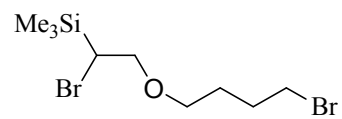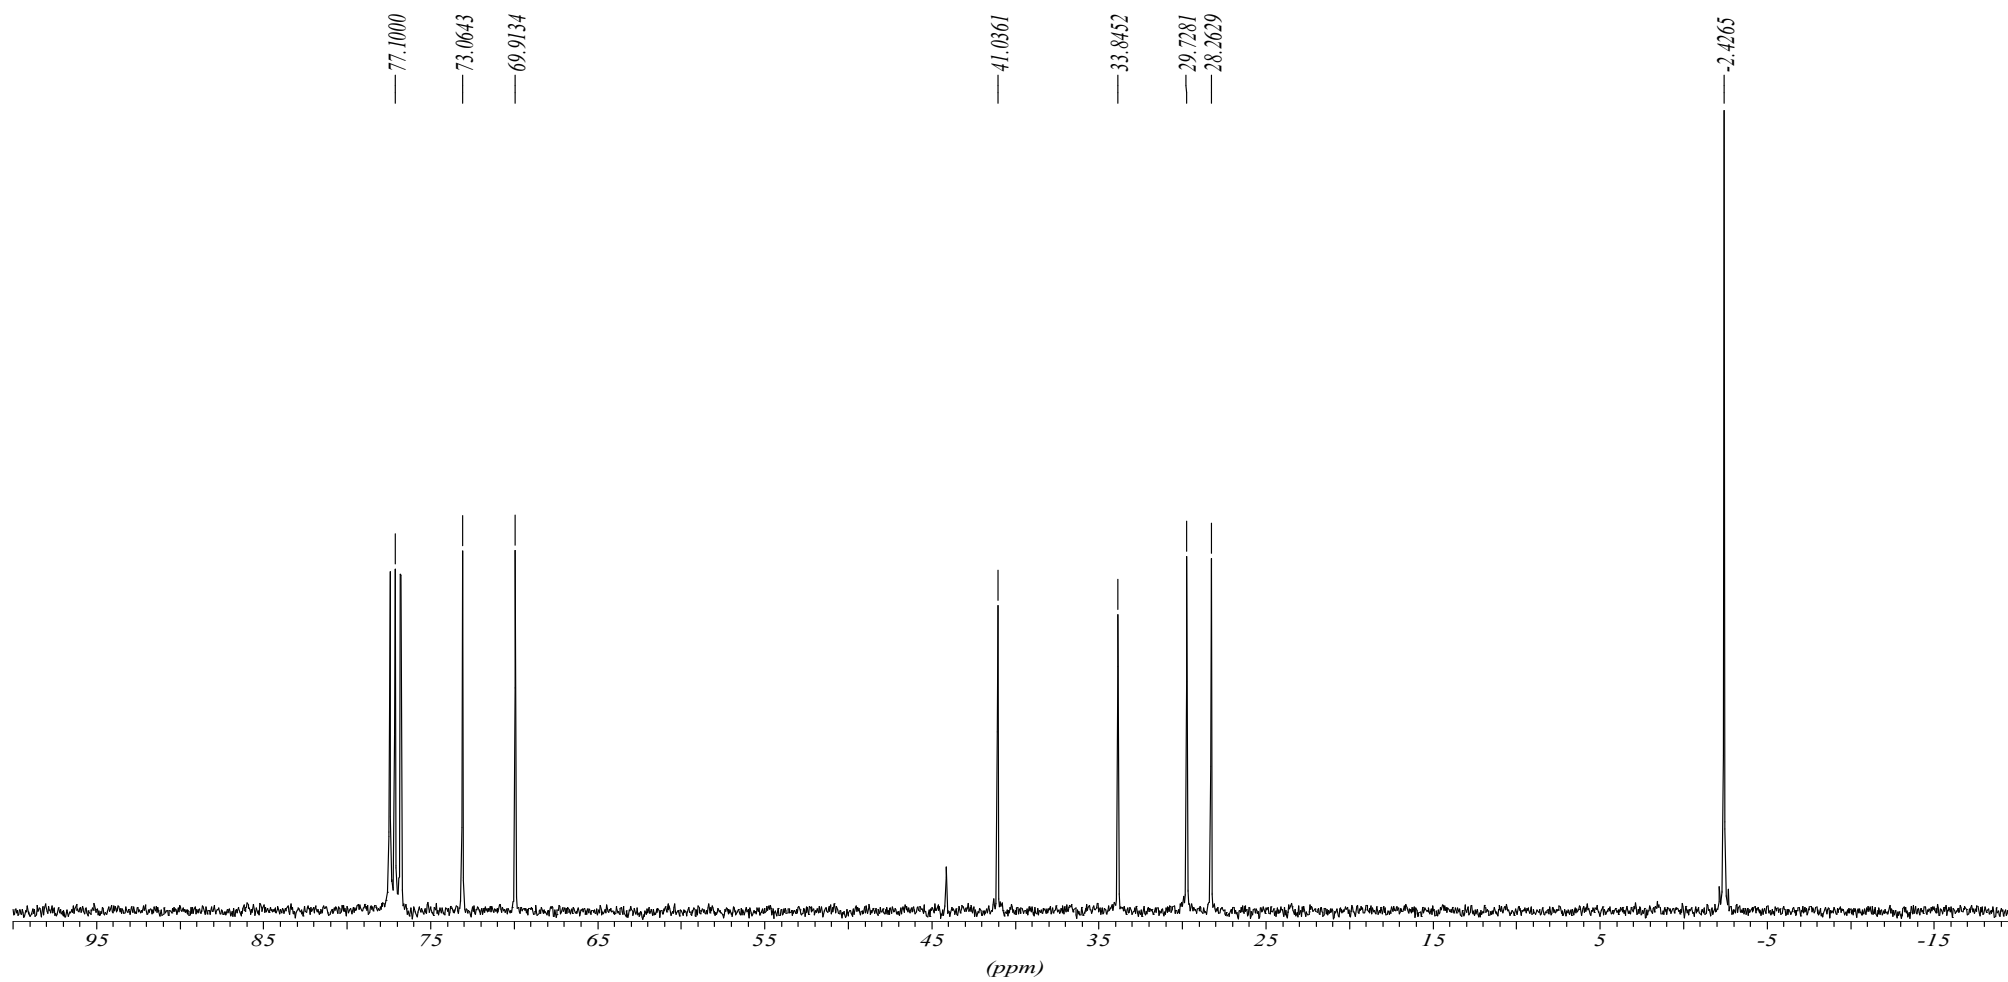

<sup>1</sup>H NMR spectrum of compound **10b**

*1*-(Methylsulfonyl)-2-(trimethylsilyl)aziridine, **10b**

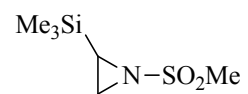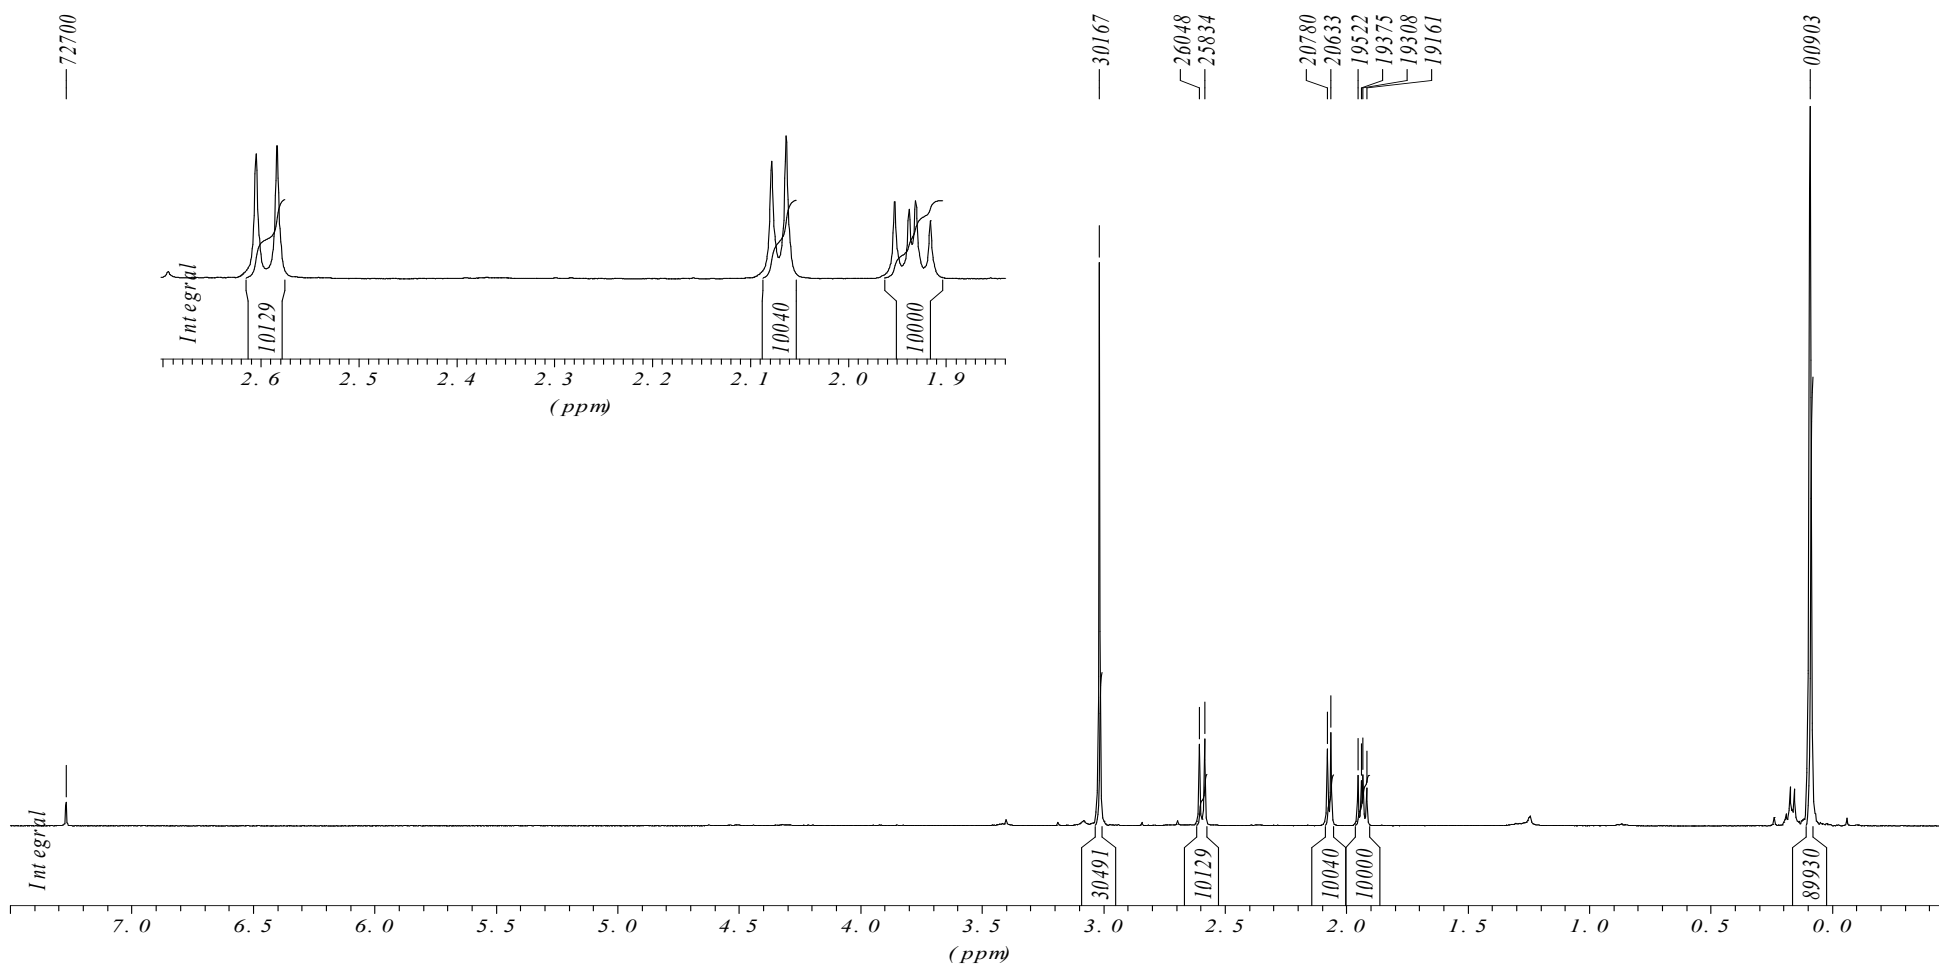

$^{13}\text{C}$  NMR spectrum of compound **10b**

*1-(Methylsulfonyl)-2-(trimethylsilyl)aziridine, 10b*

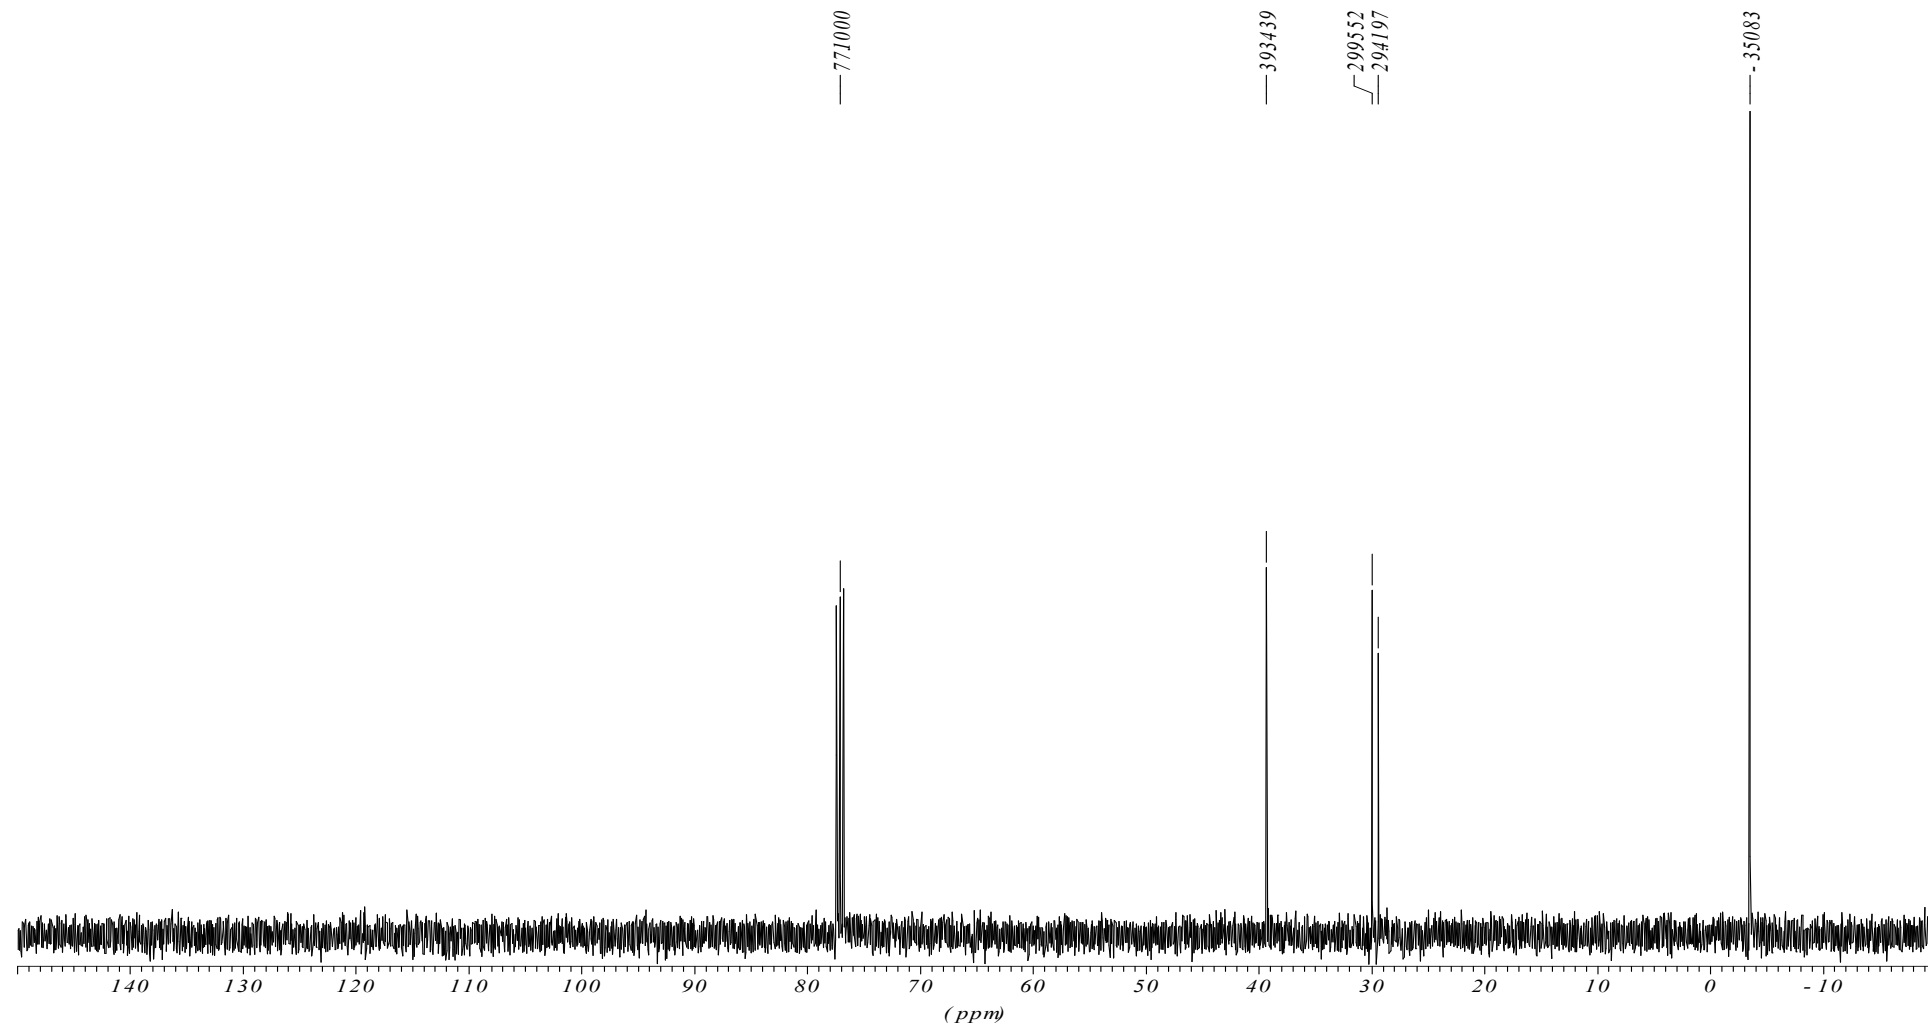

<sup>1</sup>H NMR spectrum of compound **10c**

*1-(Phenylsulfonyl)-2-(trimethylsilyl)aziridine, 10c*

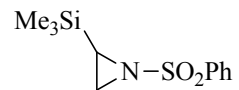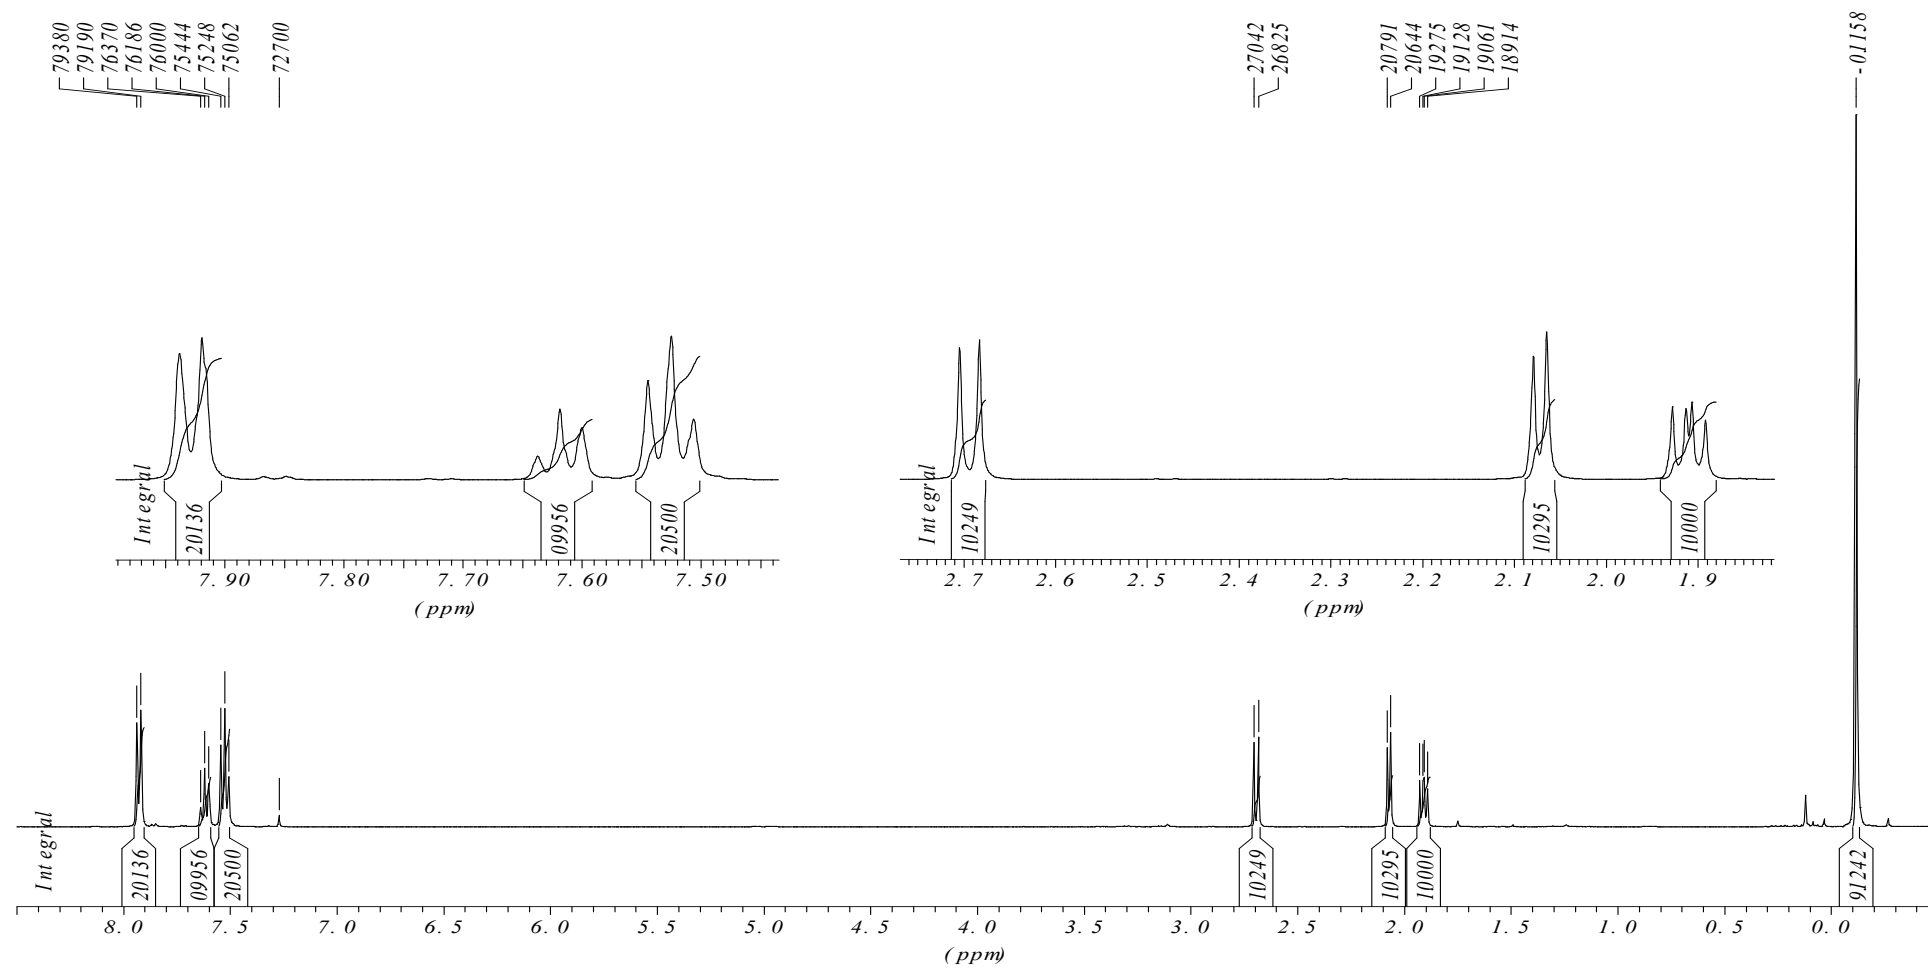



<sup>13</sup>C NMR spectrum of compound **10c**

*1-(Phenylsulfonyl)-2-(trimethylsilyl)aziridine, 10c*

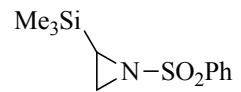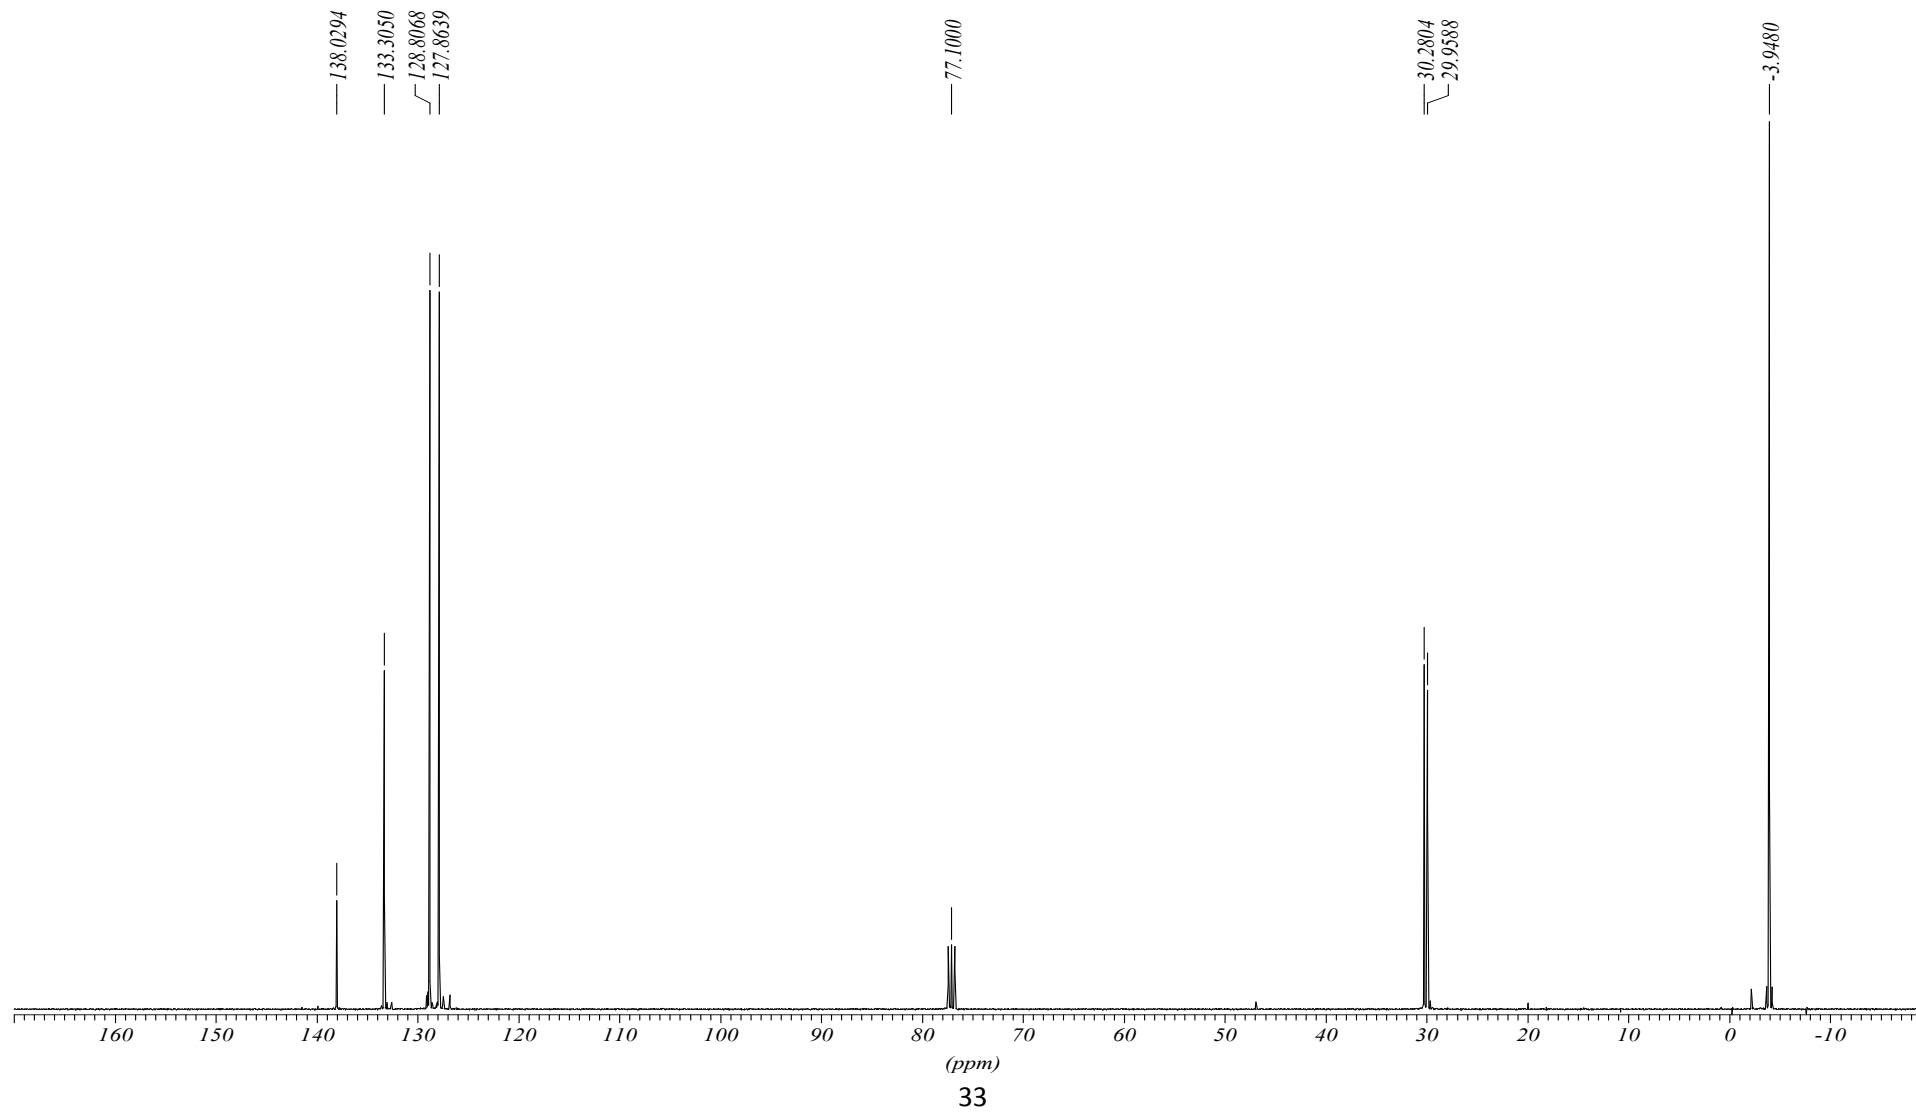

<sup>1</sup>H NMR spectrum of compound **10d**

*1-Tosyl-2-(trimethylsilyl)aziridine, 10d*

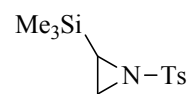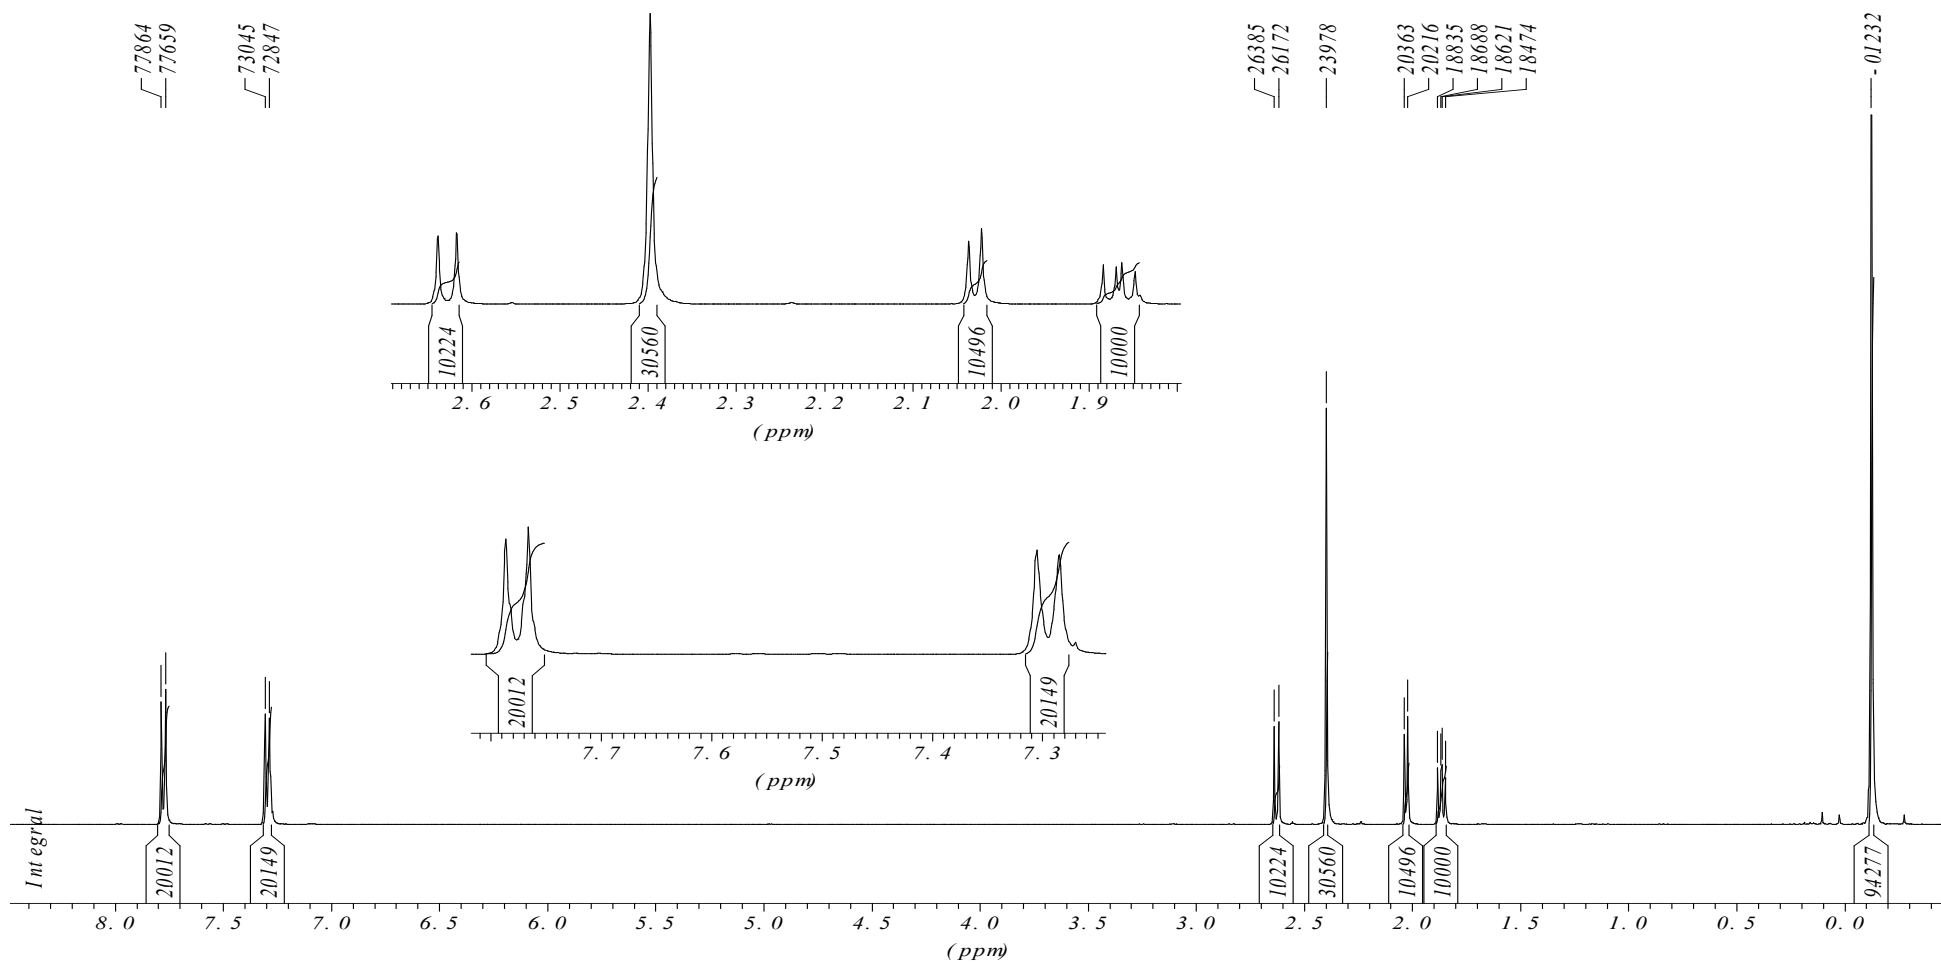

$^{13}\text{C}$  NMR spectrum of compound **10d**

*1-Tosyl-2-(trimethylsilyl)aziridine, 10d*

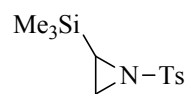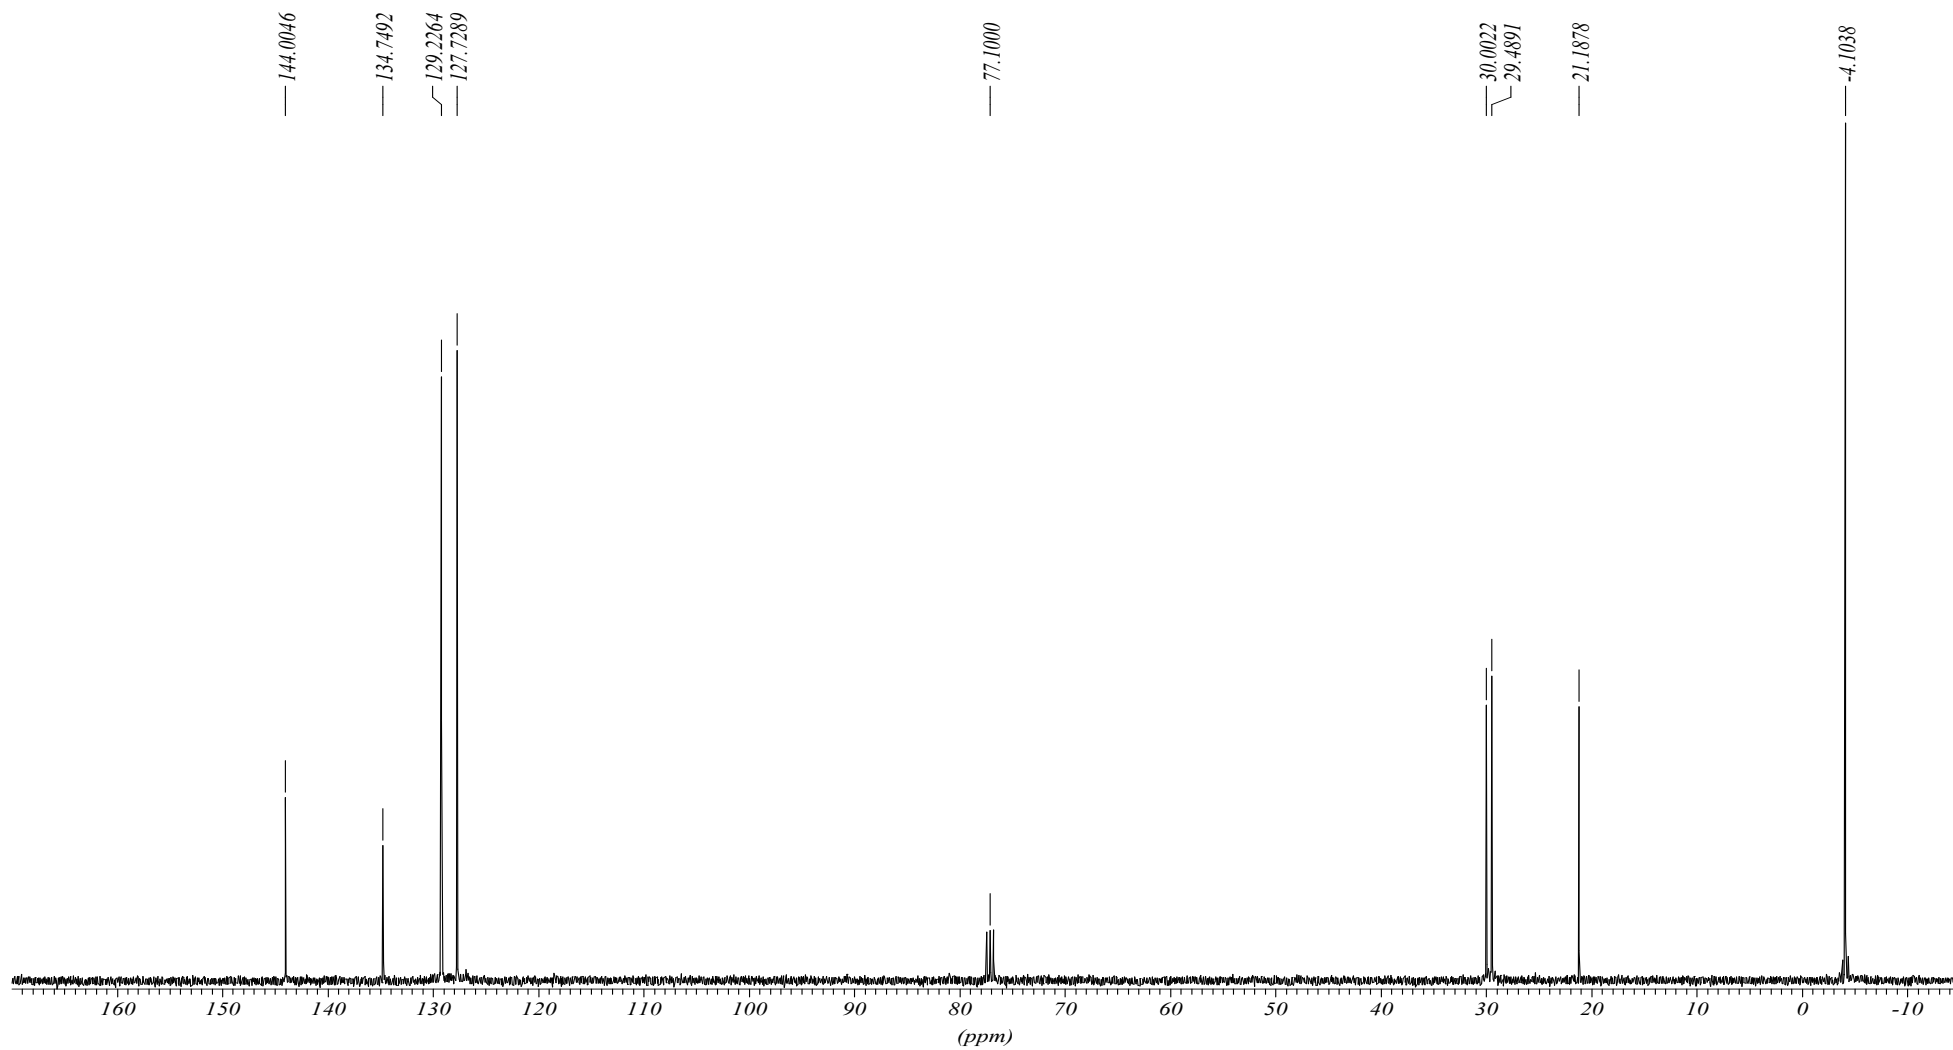

<sup>1</sup>H NMR spectrum of compound **10e**

*1-((4-Methoxyphenyl)sulfonyl)-2-(trimethylsilyl)aziridine, 10e*

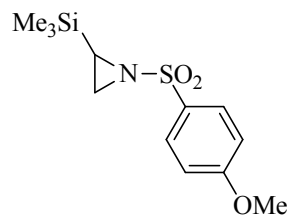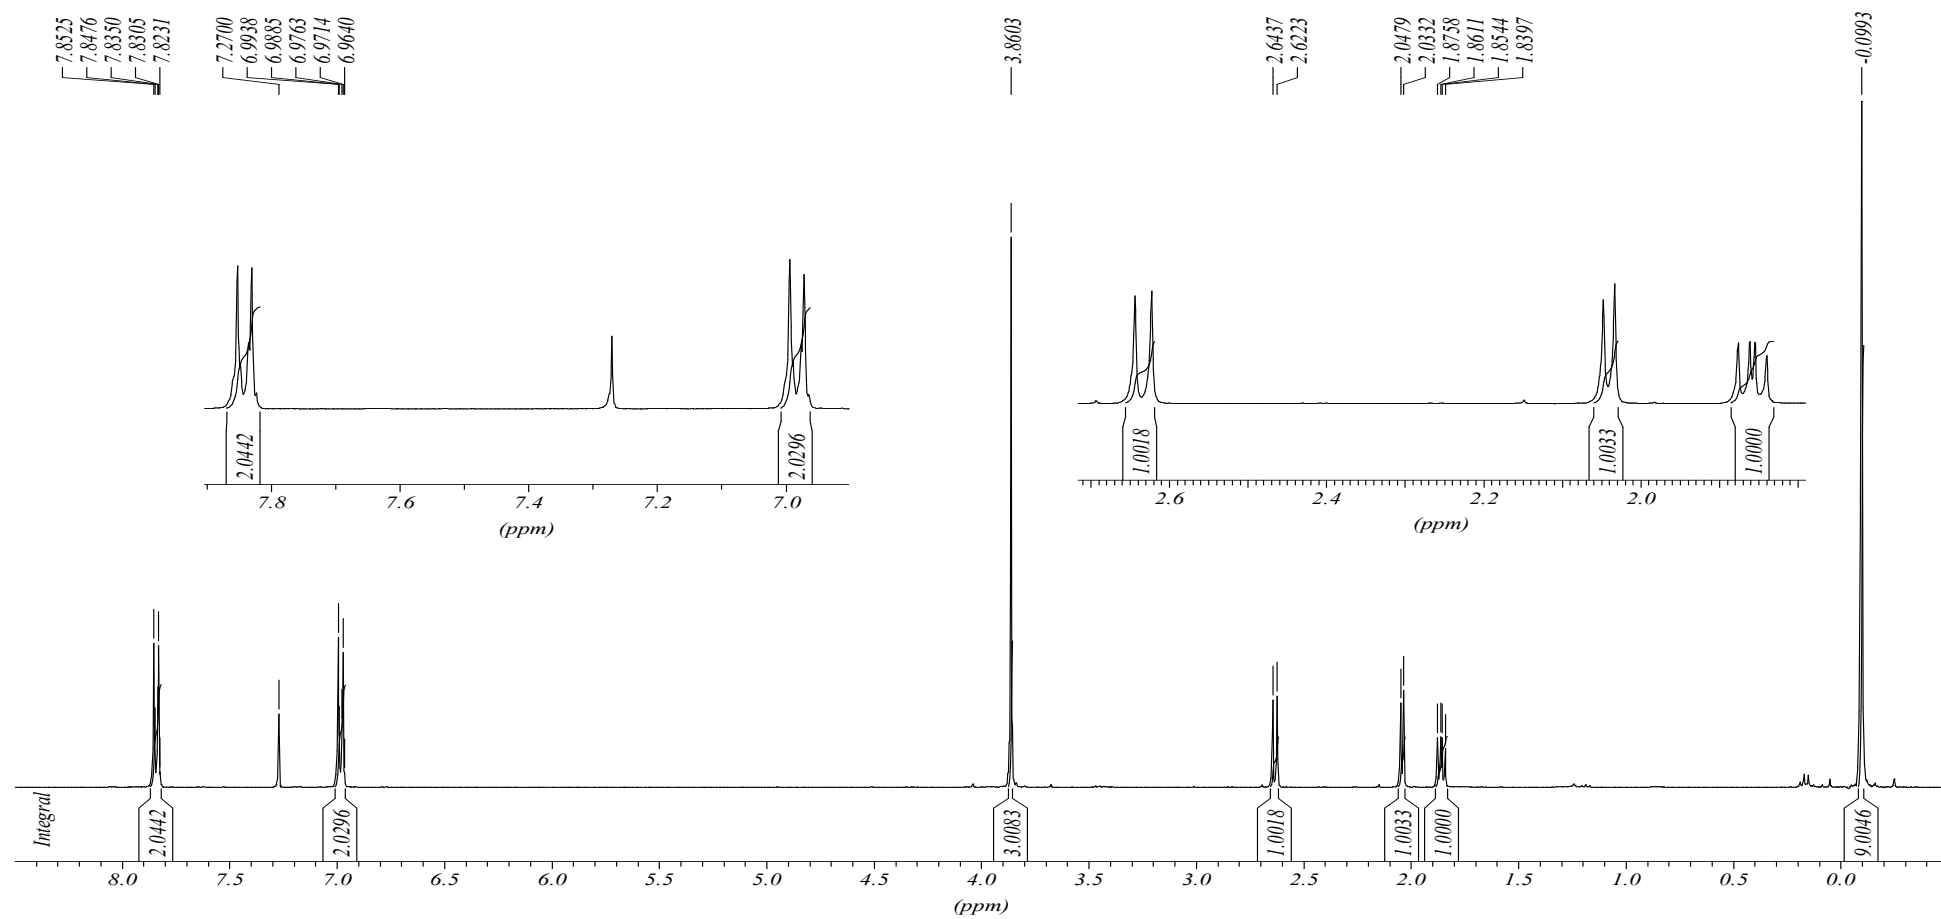

<sup>13</sup>C NMR spectrum of compound **10e**

*1-((4-Methoxyphenyl)sulfonyl)-2-(trimethylsilyl)aziridine, 10e*

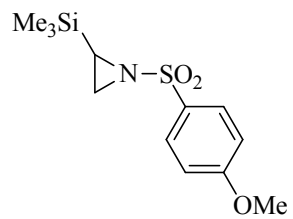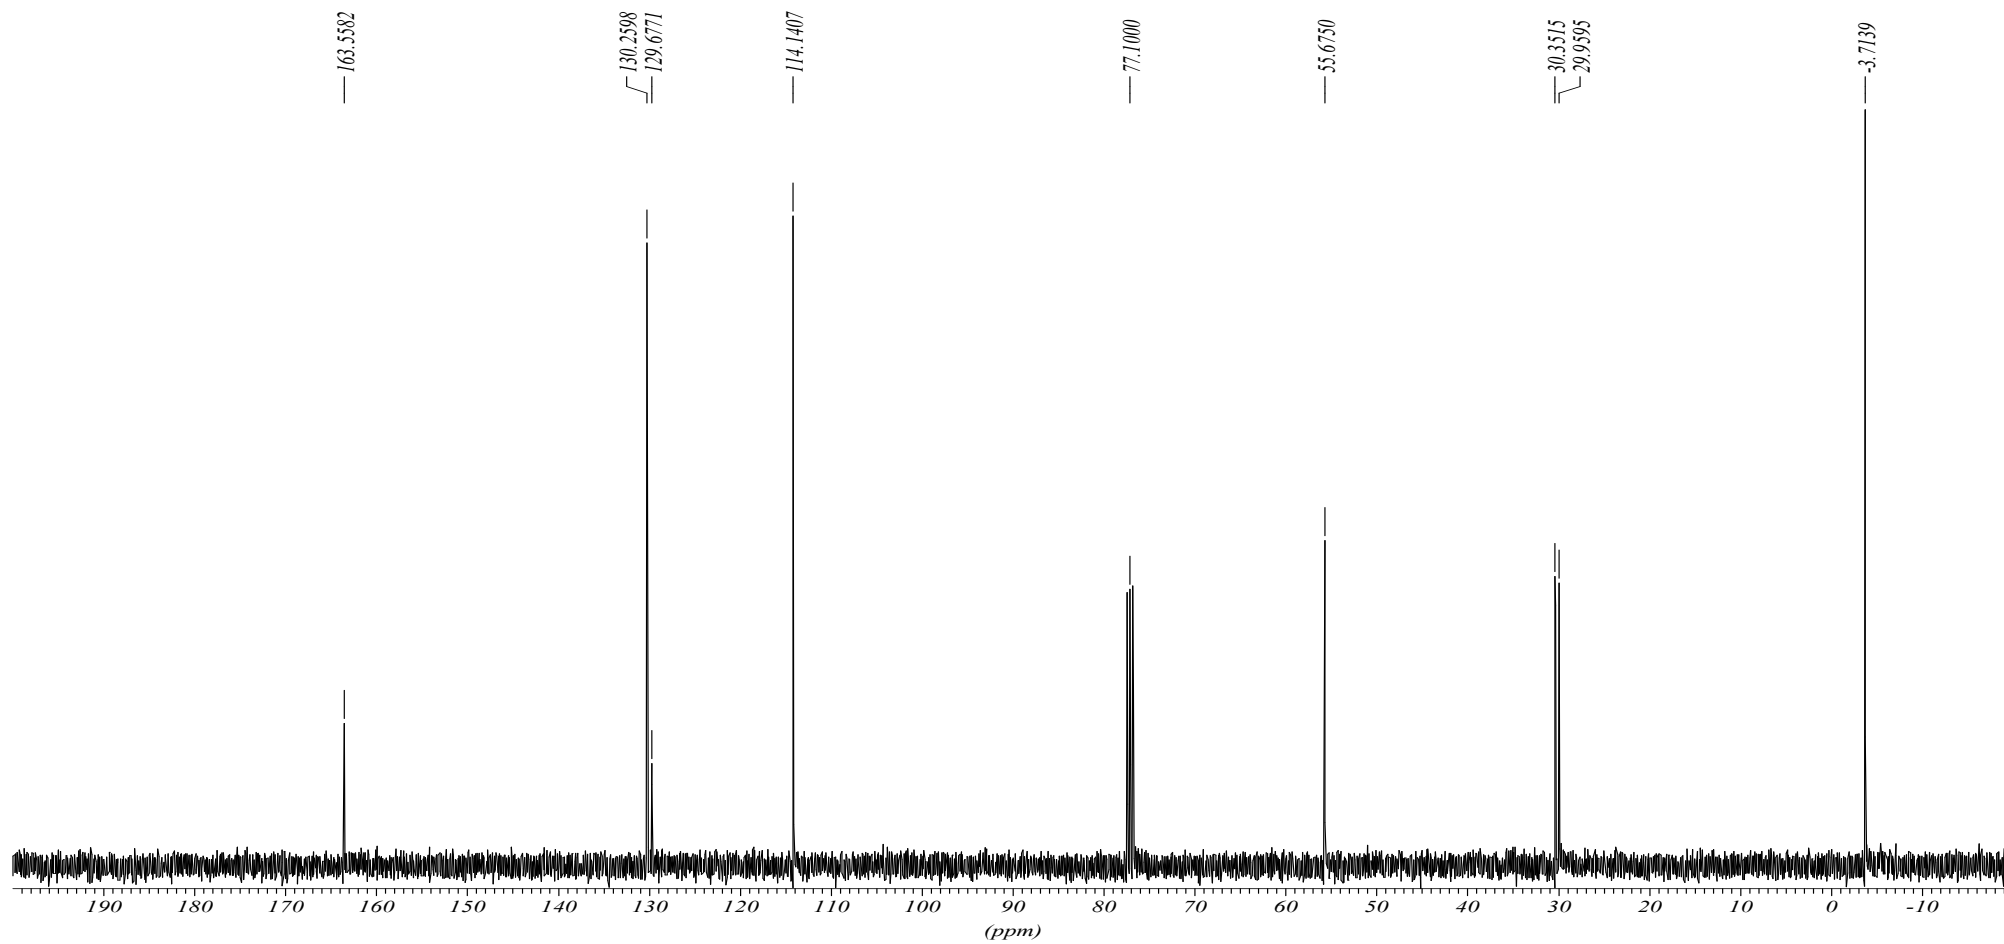

# <sup>1</sup>H NMR spectrum of compound **10f**

*1-((4-chlorophenyl)sulfonyl)-2-(trimethylsilyl)aziridine, 10f*

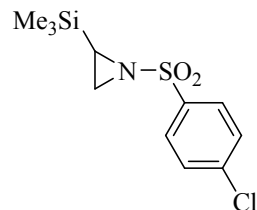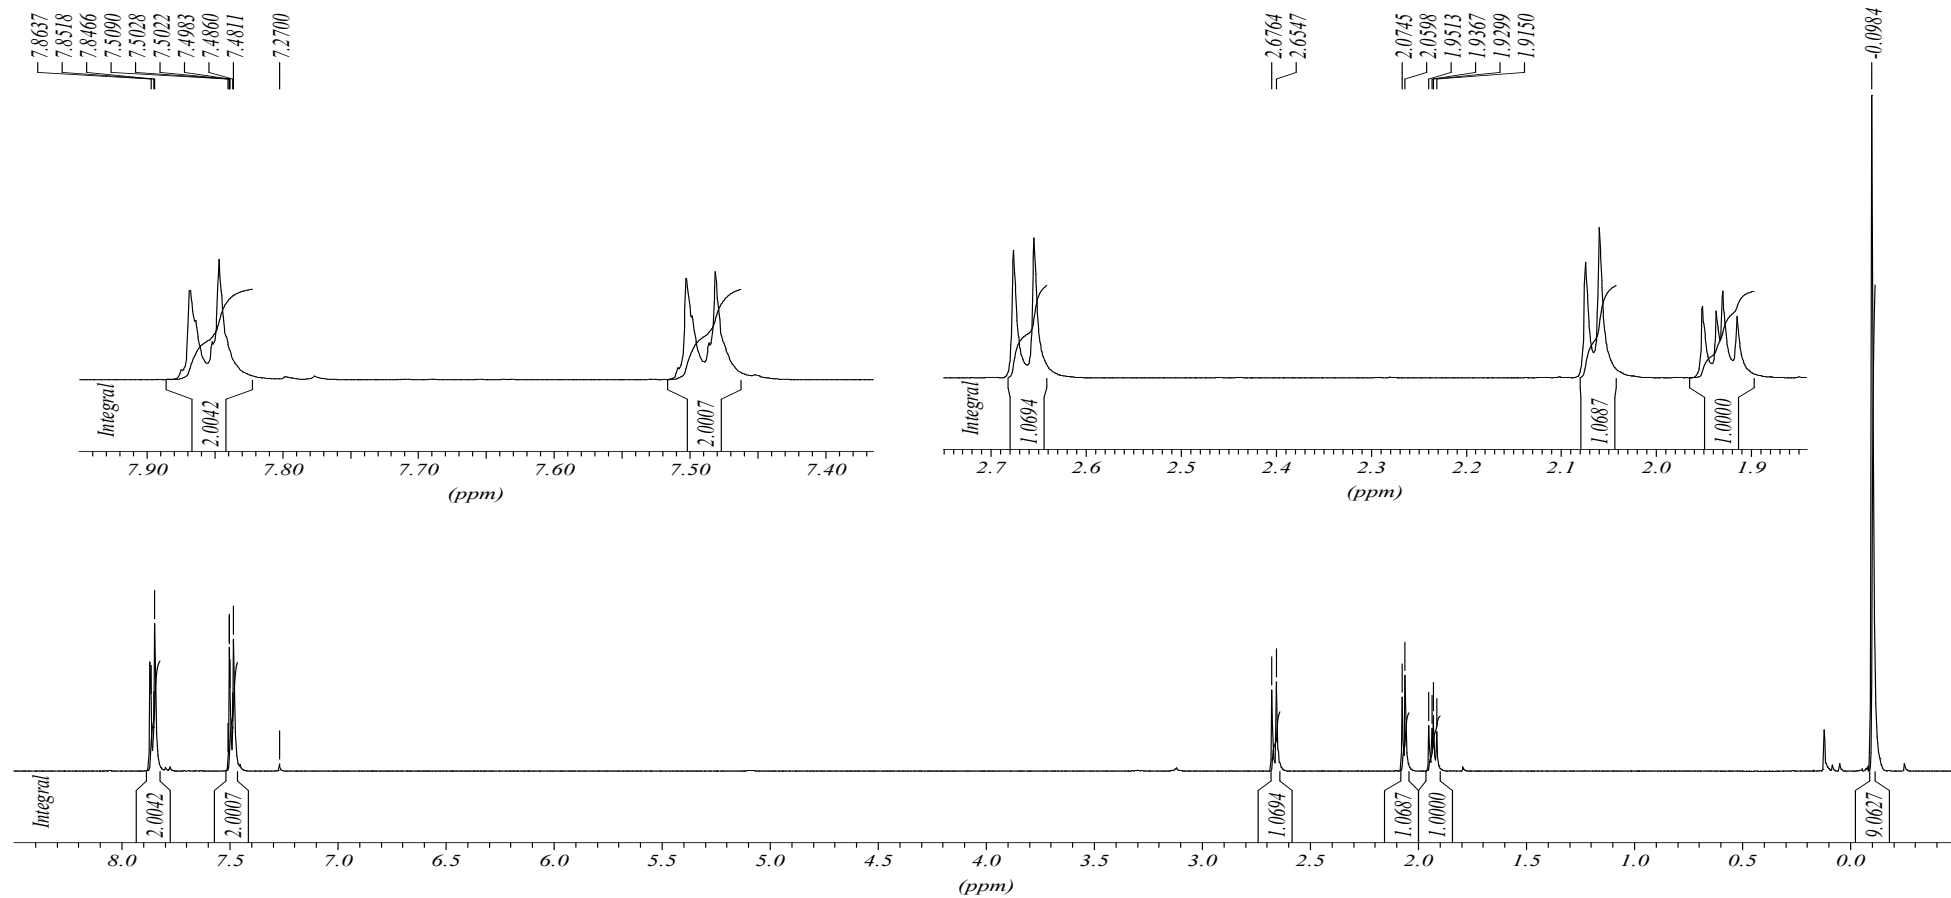

<sup>13</sup>C NMR spectrum of compound **10f**

*1-((4-chlorophenyl)sulfonyl)-2-(trimethylsilyl)aziridine, 10f*

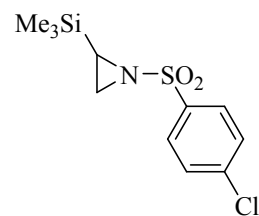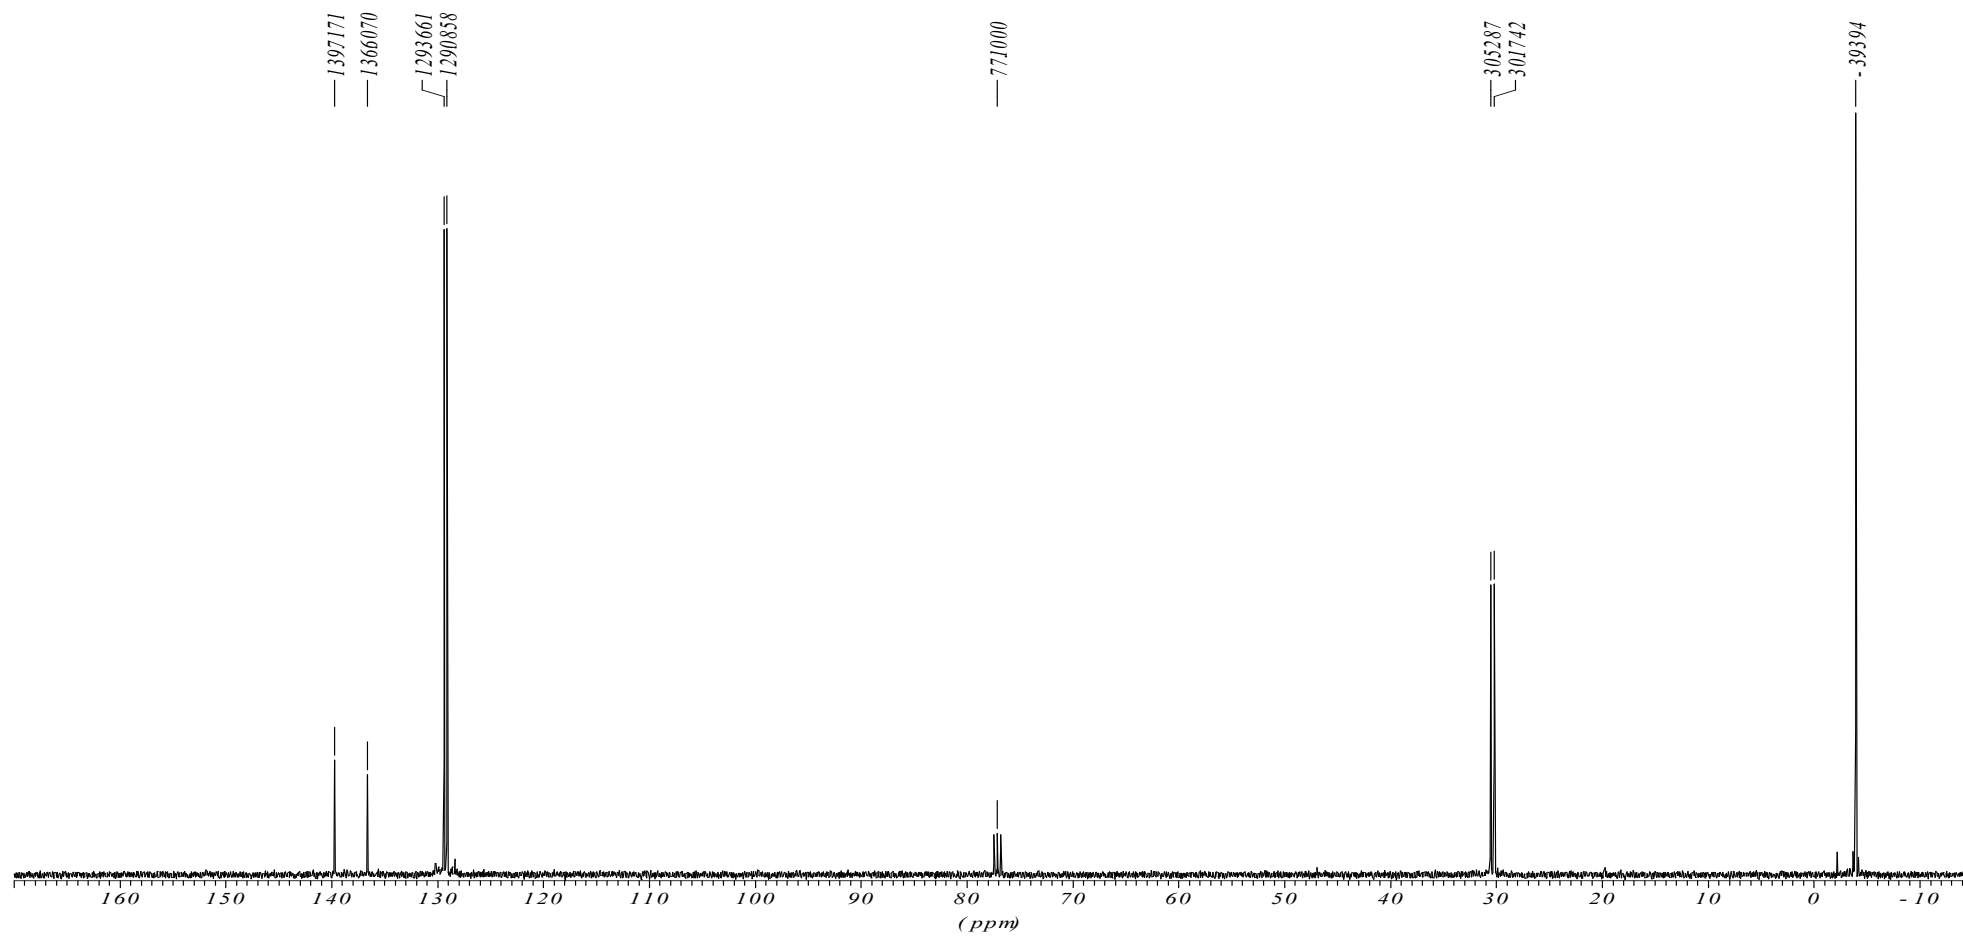

# <sup>1</sup>H NMR spectrum of compound **10g**

*1-((4-Chlorophenyl)sulfonyl)-2-(trimethylsilyl)aziridine, 10g*

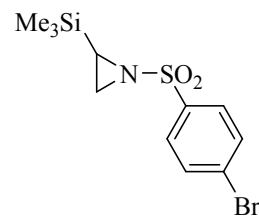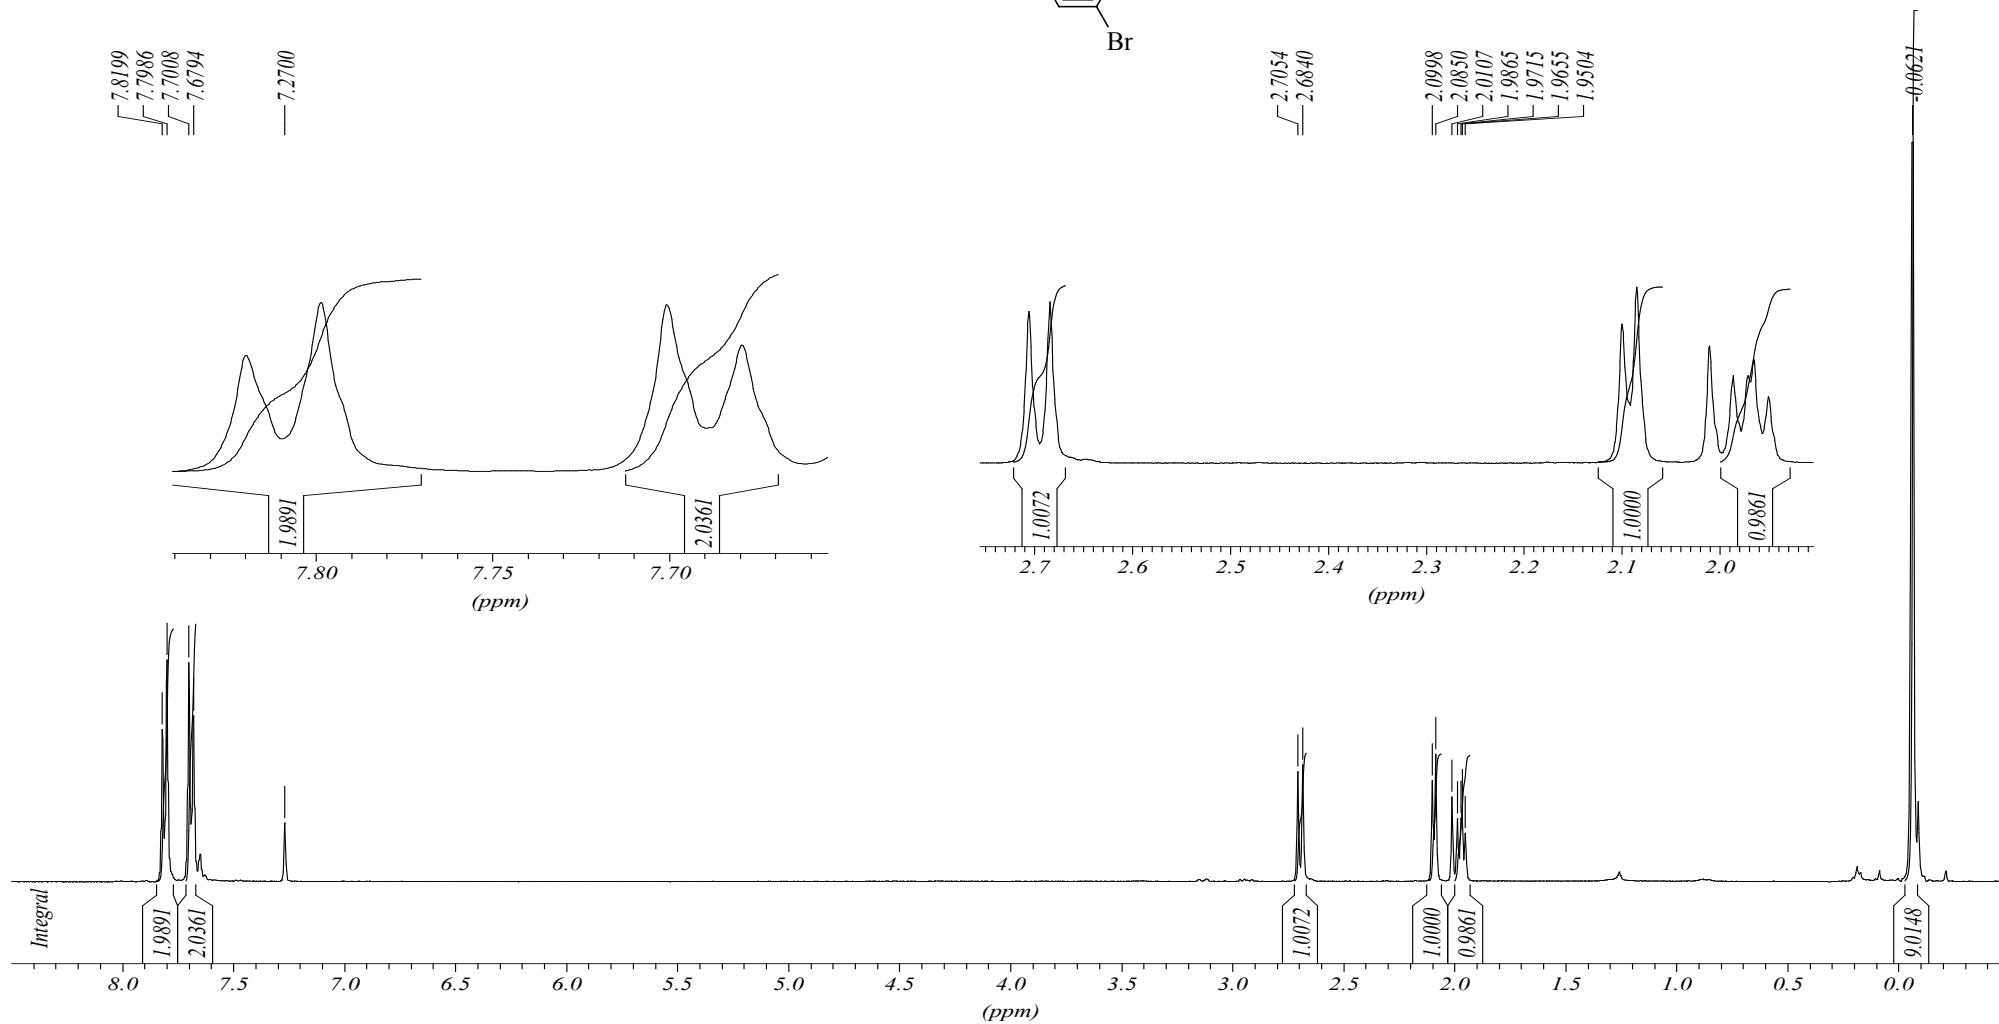



<sup>13</sup>C NMR spectrum of compound **10g**

*1-((4-Chlorophenyl)sulfonyl)-2-(trimethylsilyl)aziridine, 10g*

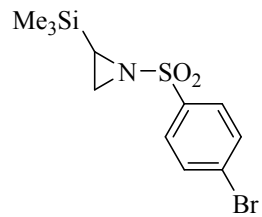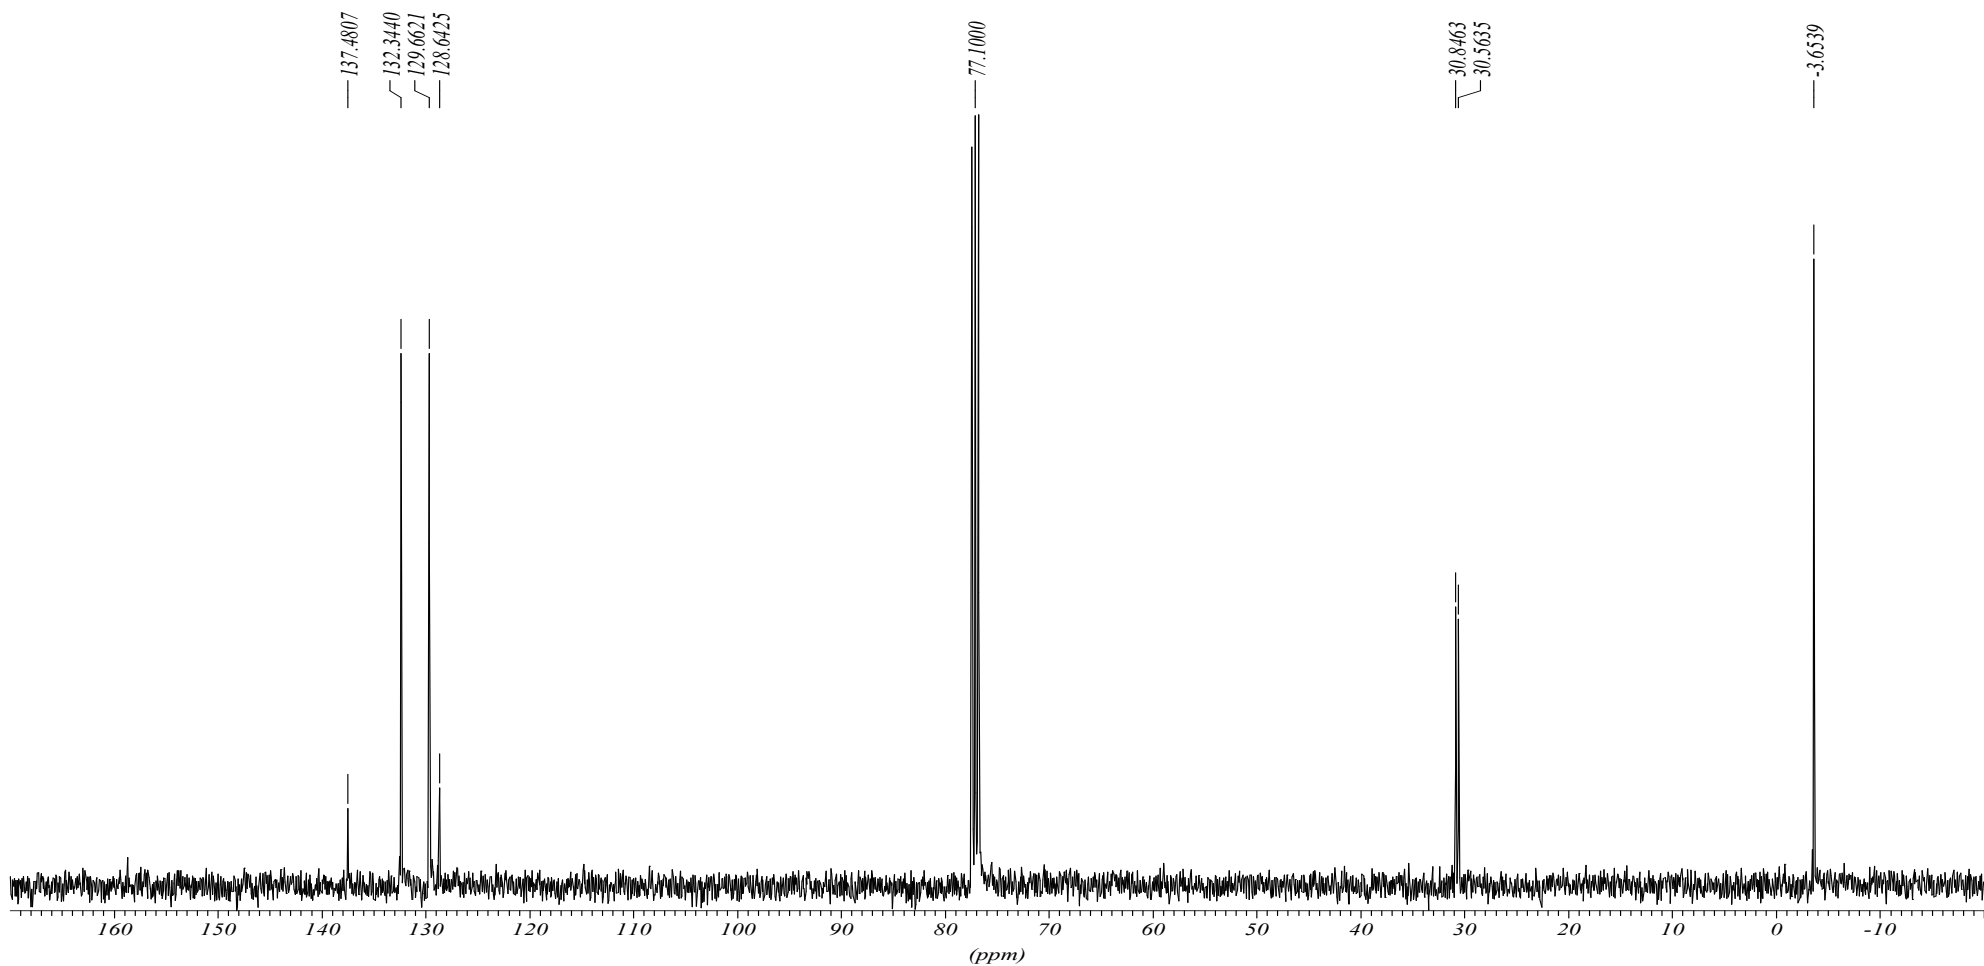

# <sup>1</sup>H NMR spectrum of compound **10h**

*1-((4-Nitrophenyl)sulfonyl)-2-(trimethylsilyl)aziridine, 10h*

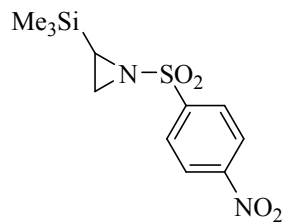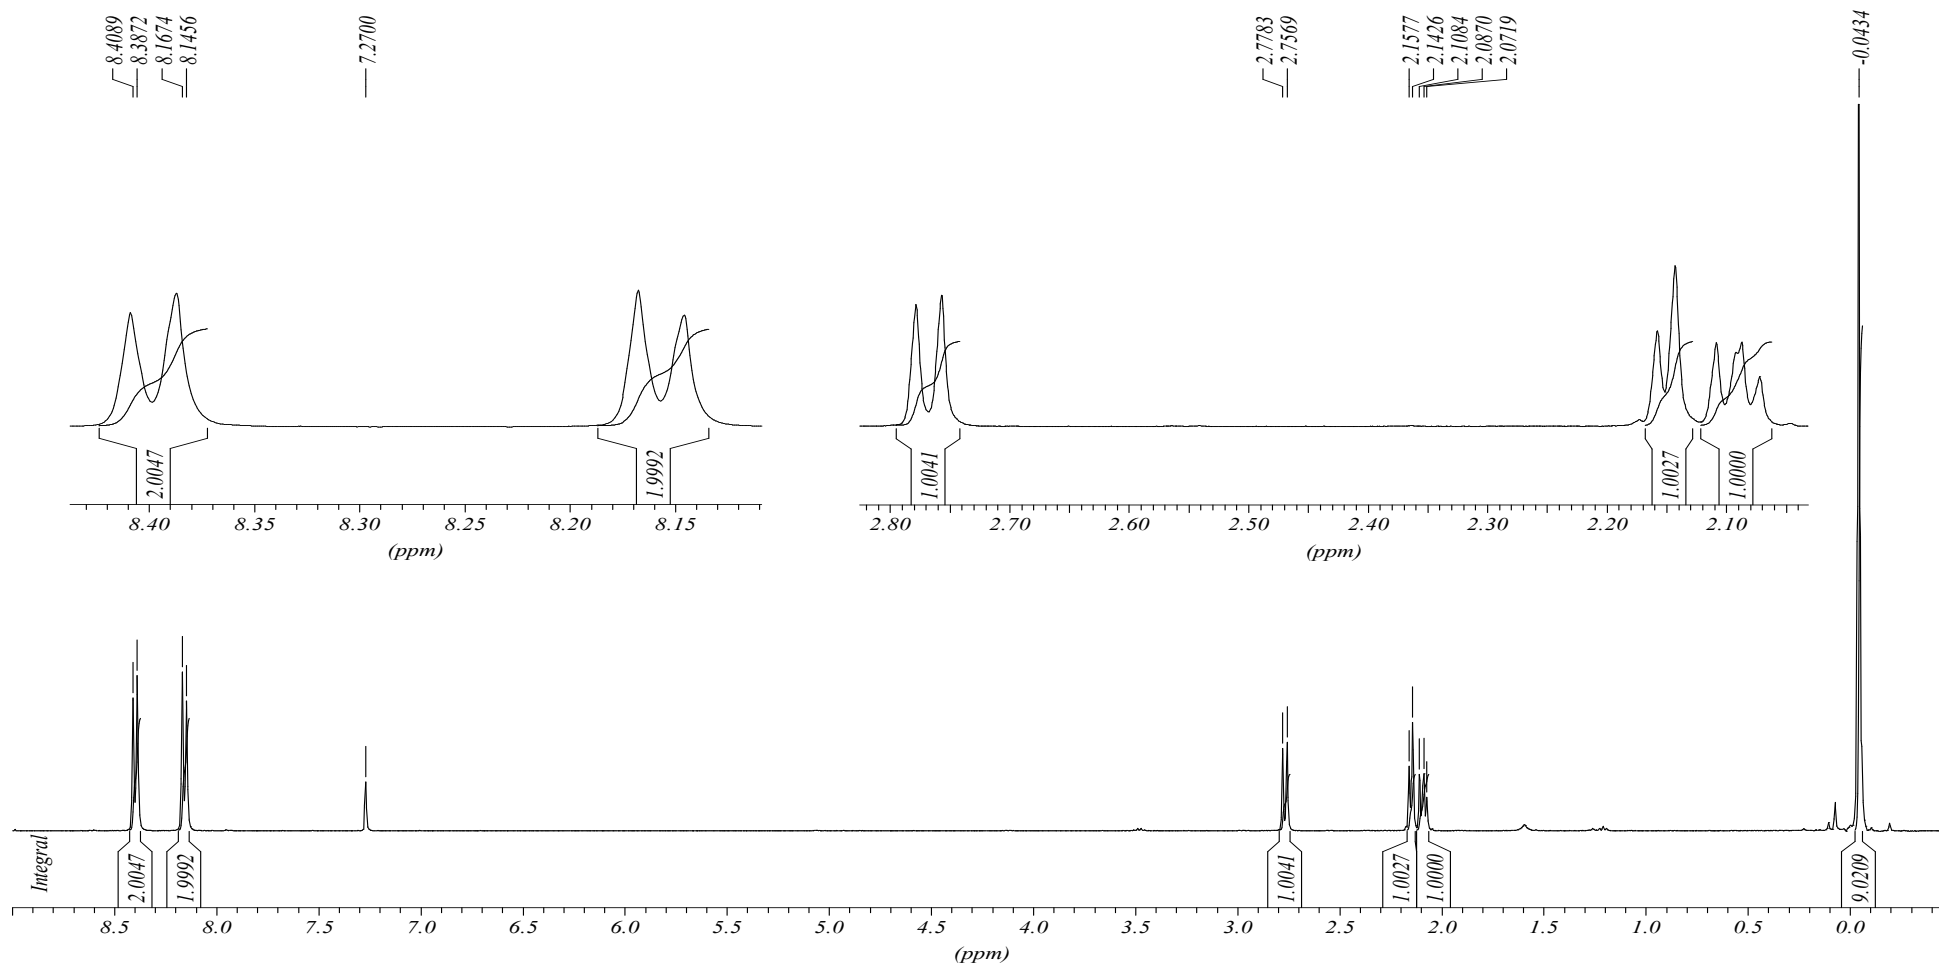

<sup>13</sup>C NMR spectrum of compound **10h**  
*1-((4-Nitrophenyl)sulfonyl)-2-(trimethylsilyl)aziridine, 10h*

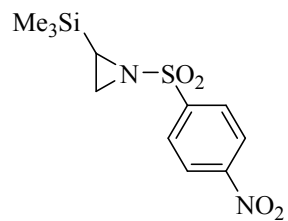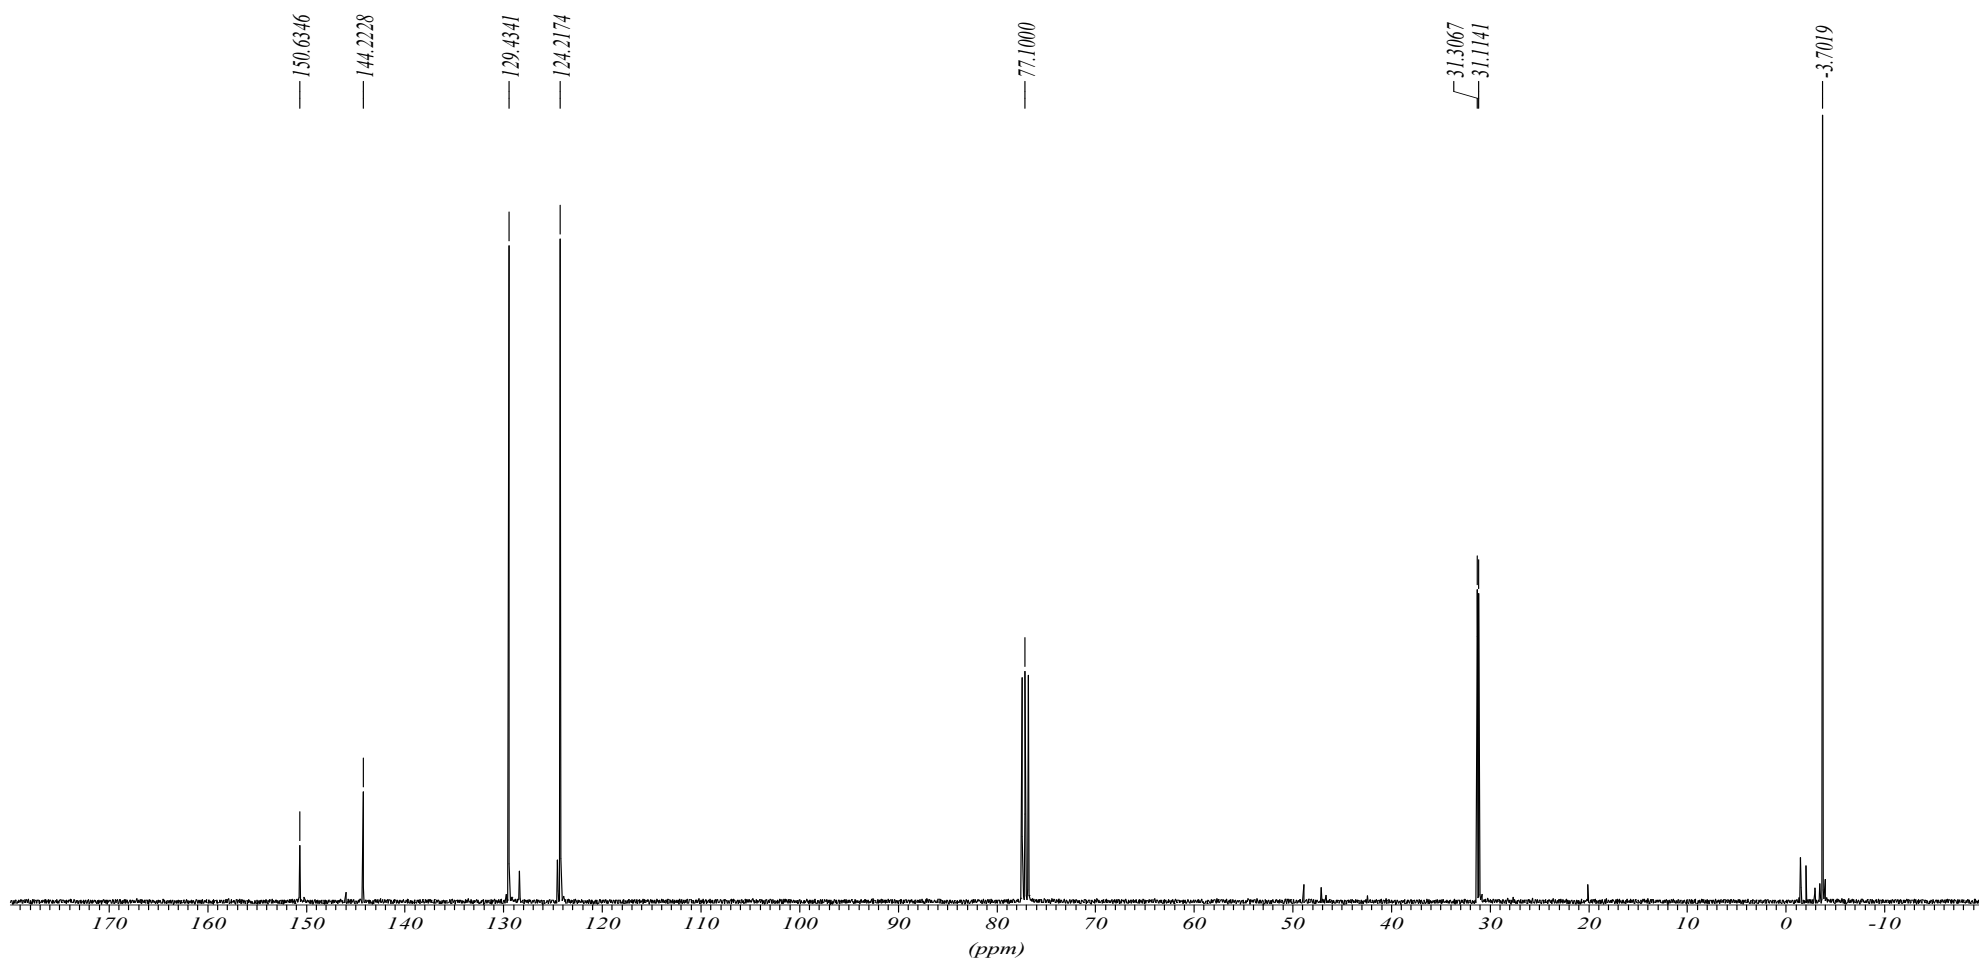

# <sup>1</sup>H NMR spectrum of compound **13**

2-Methyl-1-((trifluoromethyl)sulfonyl)-5-(trimethylsilyl)-4,5-dihydro-1H-imidazole, **13**

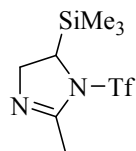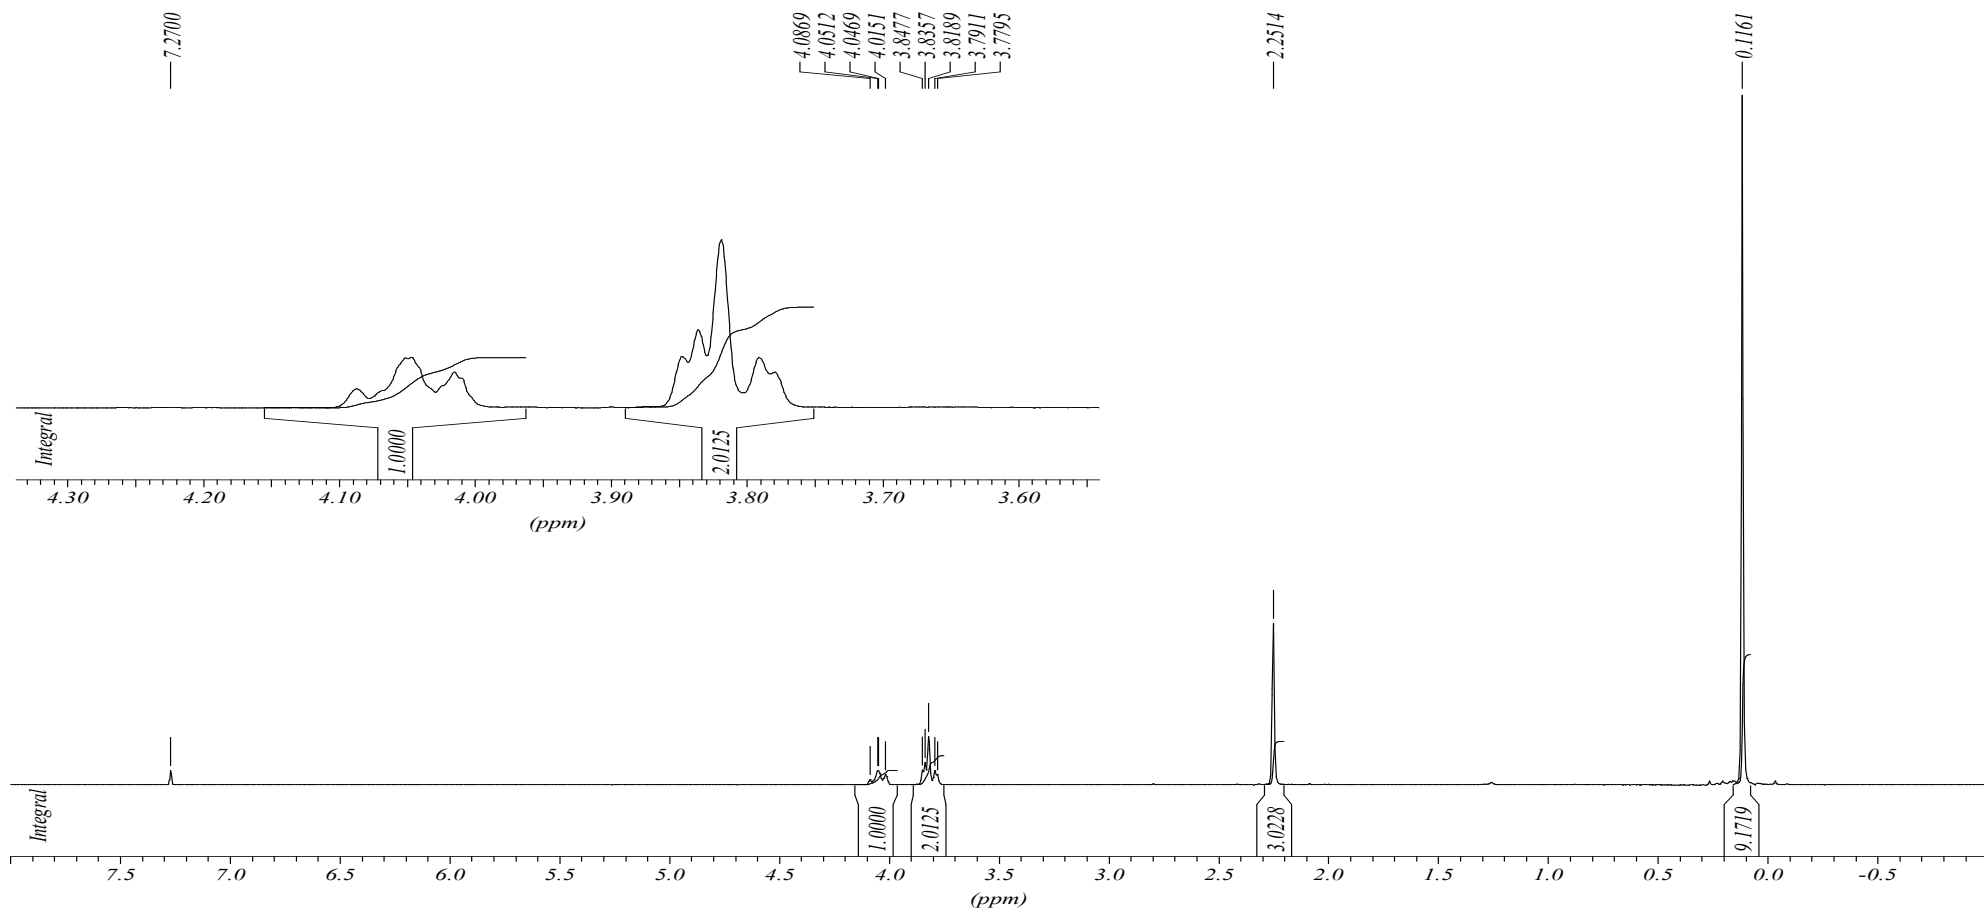

$^{13}\text{C}$  NMR spectrum of compound **13**

2-Methyl-1-((trifluoromethyl)sulfonyl)-5-(trimethylsilyl)-4,5-dihydro-1H-imidazole, **13**

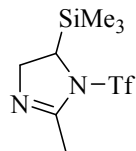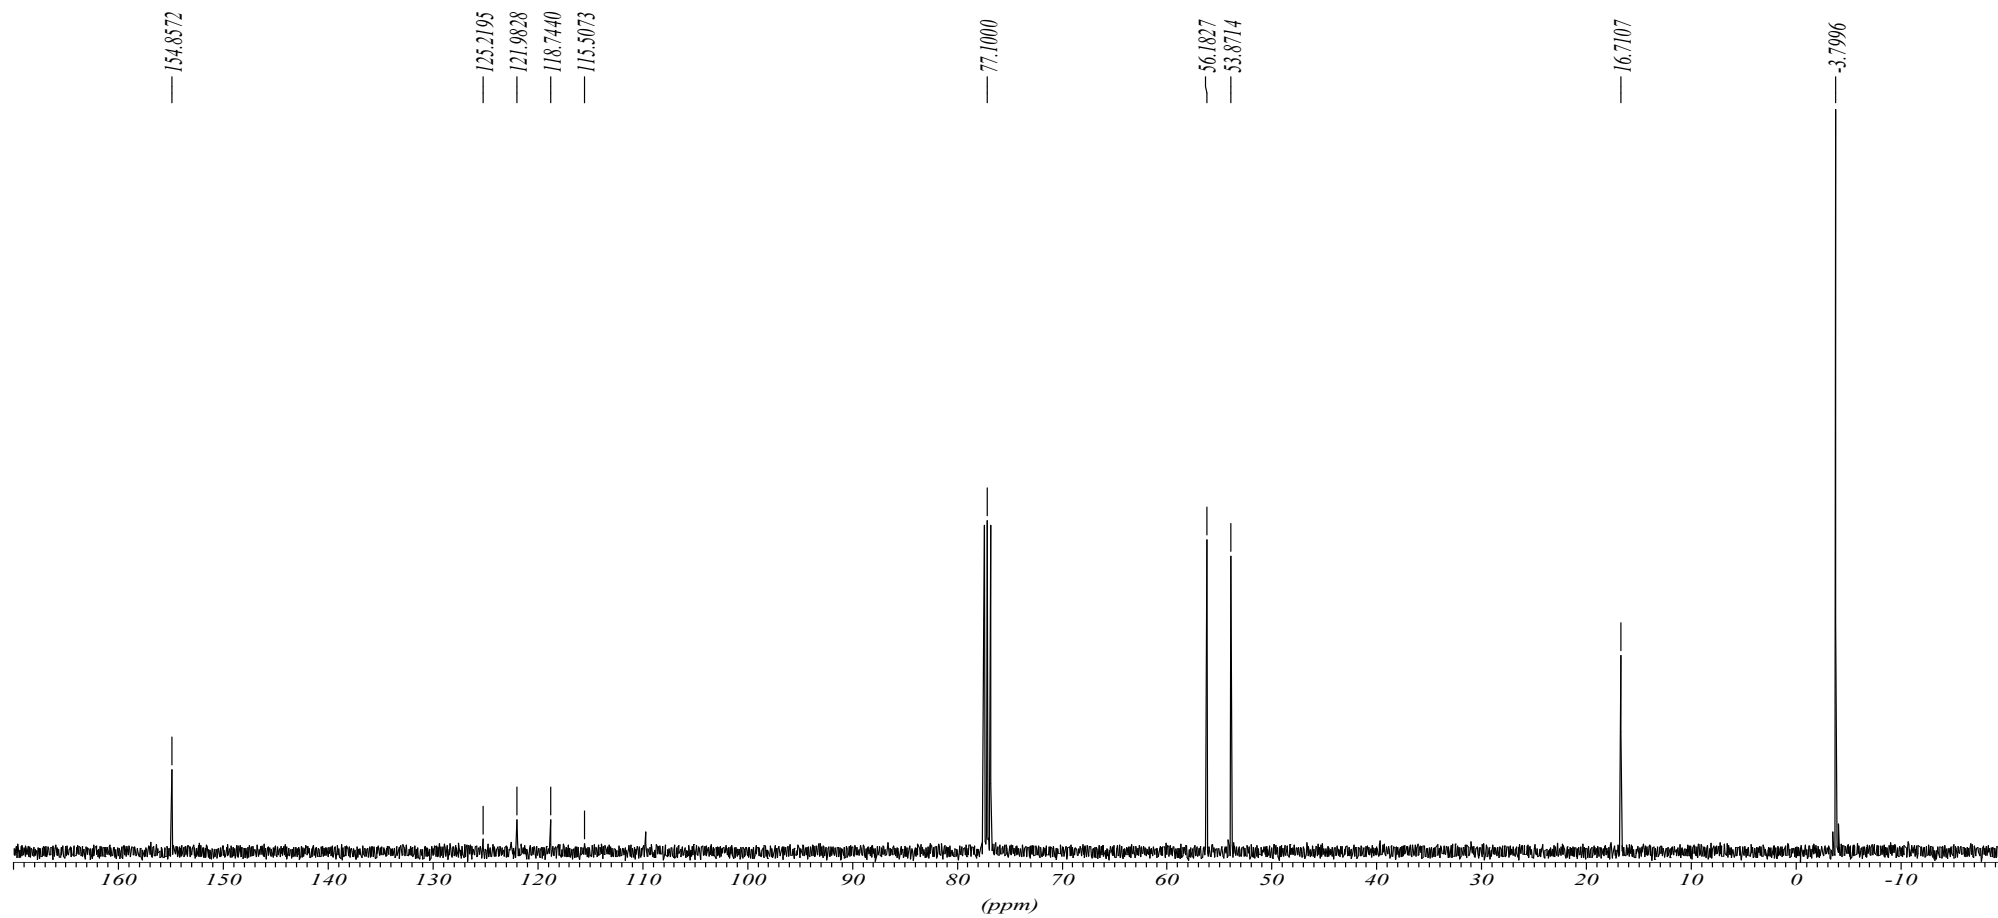

<sup>1</sup>H NMR spectrum of compound **14**

4-((Trifluoromethyl)sulfonyl)-3-(trimethylsilyl)-1,4-oxazocane, **14**

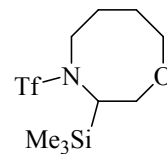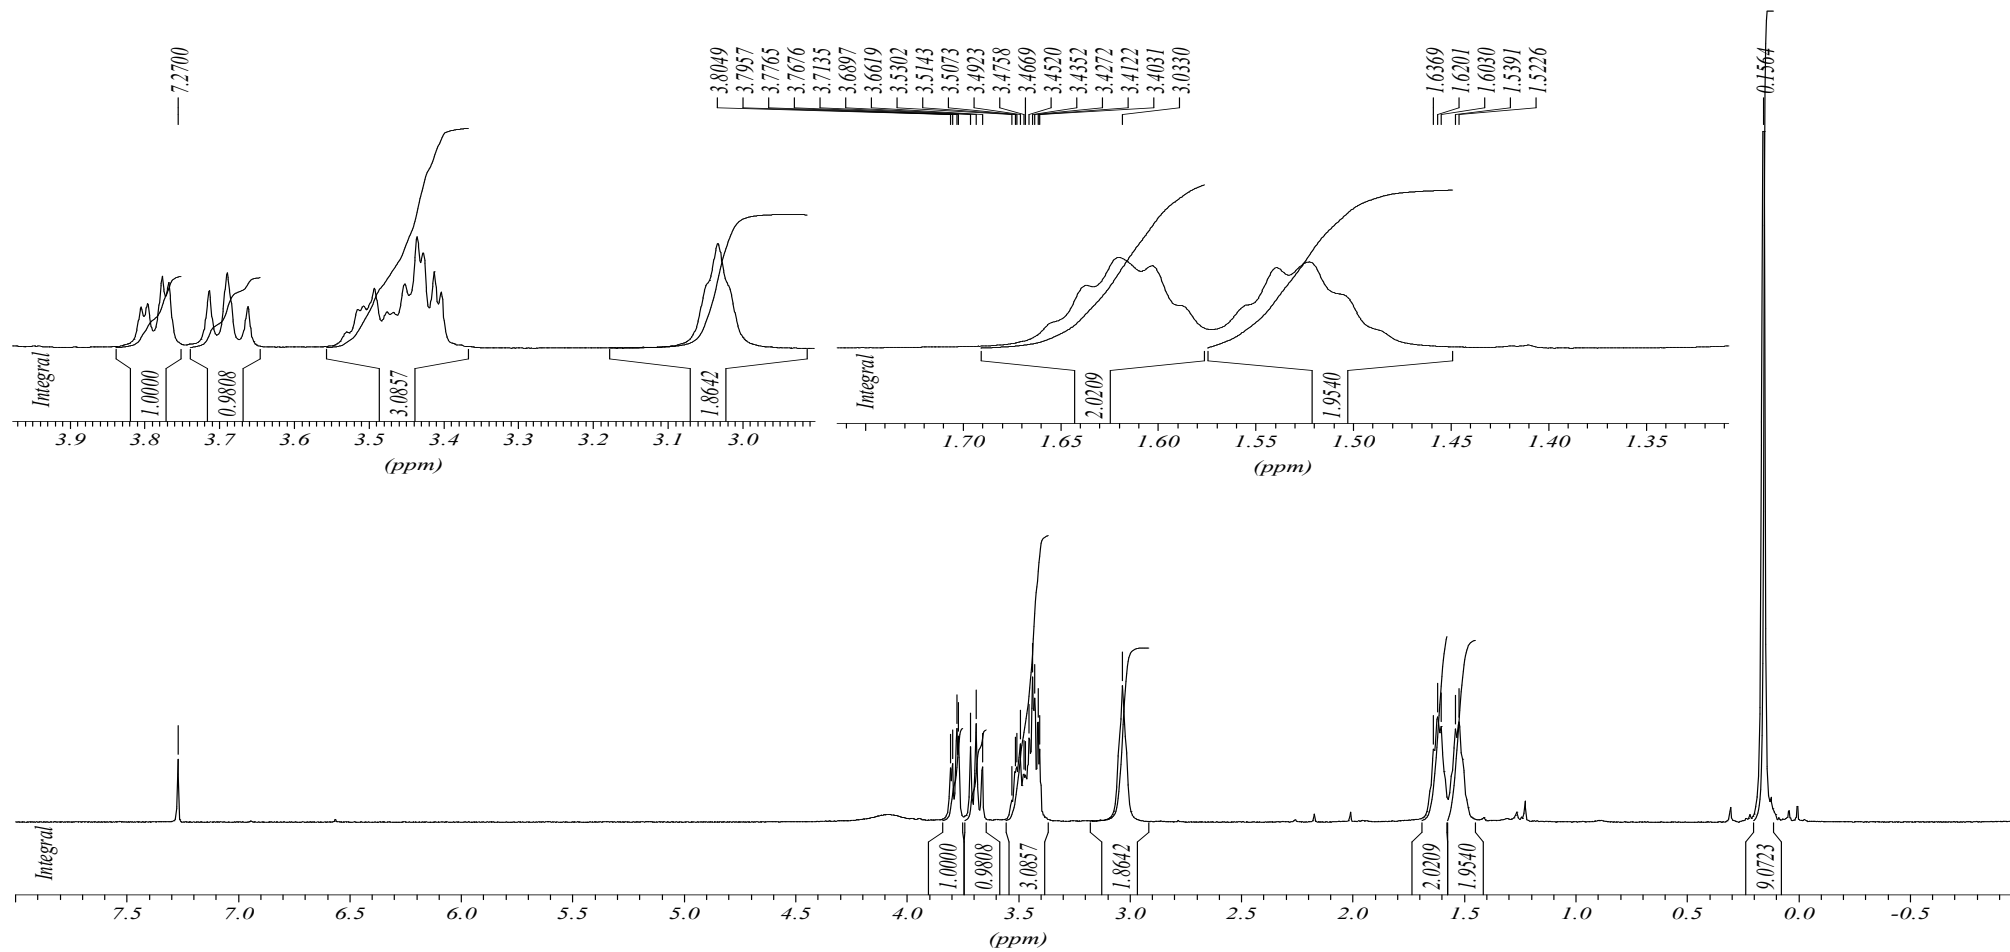

$^{13}\text{C}$  NMR spectrum of compound **14**

4-((Trifluoromethyl)sulfonyl)-3-(trimethylsilyl)-1,4-oxazocane, **14**

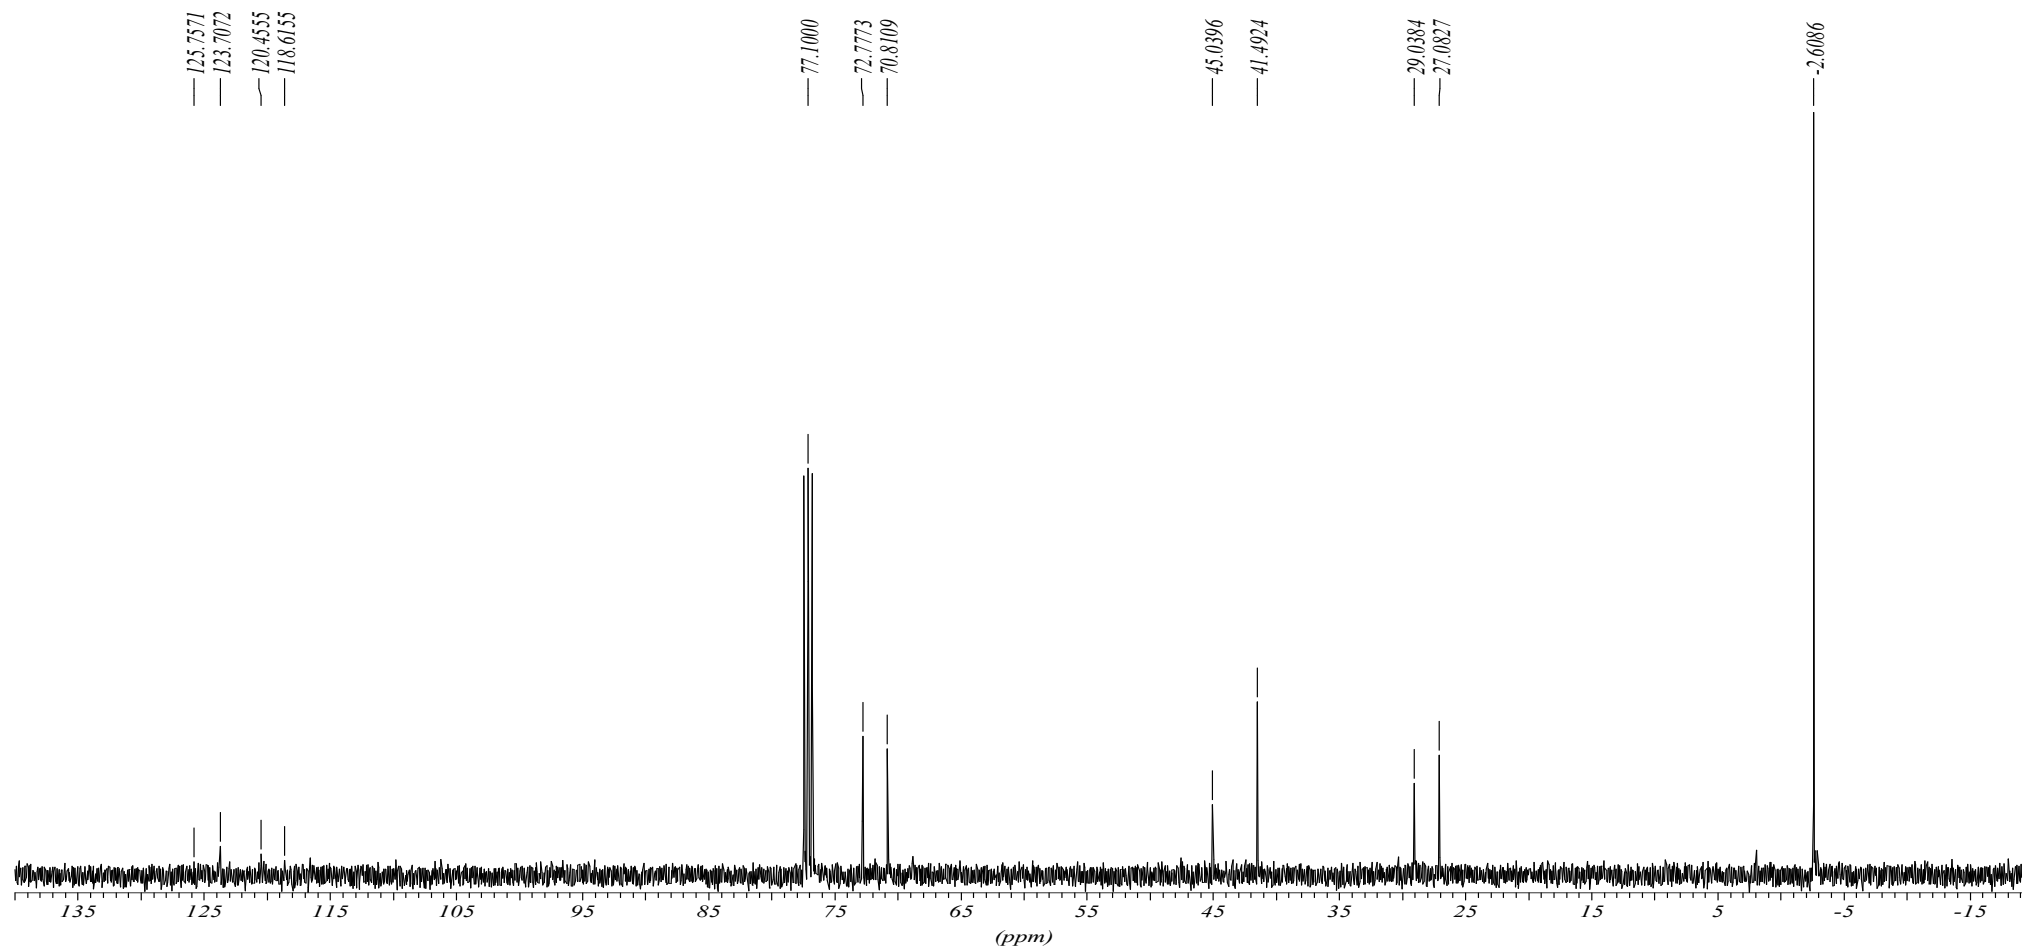

Supplement: c9ob01689a1.pdf [file c9ob01689a1.pdf]
